# Supplementary material for: New Biocides Based on N4-Alkylcytidines: Effects on Microorganisms and Application for the Protection of Cultural Heritage Objects of Painting
Source: MDPI journal article supplement (doi:10.3390/ijms25053053), 2024-03-06

# New Biocides Based on *N*<sup>4</sup>-alkylcytidines: Effects on Microorganisms and Application for the Protection of Cultural Heritage Objects of Painting

Liudmila A. Alexandrova<sup>1\*</sup>, Ivan A. Oskolsky<sup>1</sup>, Dmitry A. Makarov<sup>1</sup>, Maxim V. Jasko<sup>1</sup>, Inna L. Karpenko<sup>1</sup>, Olga V. Efremenkova<sup>2</sup>, Byazilya F. Vasilyeva<sup>2</sup>, Darya A. Avdanina<sup>3</sup>, Anna A. Ermolyuk<sup>3</sup>, Elizaveta E. Benko<sup>3</sup>, Stanislav G. Kalinin<sup>3</sup>, Tat'yana V. Kolganova<sup>3</sup>, Maria Ya. Berzina<sup>4</sup>, Irina D. Konstantinova<sup>4</sup>, Alexander O. Chizhov<sup>5</sup>, Sergey N. Kochetkov<sup>1</sup>, Alexander A. Zhgun<sup>3\*</sup>

<sup>1</sup> Engelhardt Institute of Molecular Biology RAS, 32 Vavilov str., Moscow 119991, Russia; ala2004\_07@mail.ru (L.A.A.); oskosky@yandex.ru (I.A.O.); dmitmakarov\_97@mail.ru (D.A.M.); 2003\_maxim@mail.ru (M.V.J.); ikarikki@gmail.com (I.L.K.); snk1952@gmail.com (S.N.K.)

<sup>2</sup> Gause Institute of New Antibiotics RAMS, 11 Bol'shaya Pirogovskaya, Moscow 119021, Russia; bivas@yandex.ru (B.F.V.); ovefr@yandex.ru (O.V.E.)

<sup>3</sup> Research Center of Biotechnology RAS, 33 Leninsky Ave, 119071, Moscow, Russia; d.avdanina@gmail.com (D.A.A.); anya\_ermolyuk@mail.ru (A.A.E.); stanislav-kalinin-1990@mail.ru (S.G.K.); elizavetabenko8@gmail.com (E.E.B.); moldiag@biengi.ac.ru (T.V.K.); zzhgun@mail.ru (A.A.Z.)

<sup>4</sup> Shemyakin-Ovchinnikov Institute of Bioorganic Chemistry, 16/10 Miklukho-Maklaya str., Moscow, 117997, Russia; kid1968@yandex.ru (I.D.K.); berzina\_maria@mail.ru (M. Ya. B.)

<sup>5</sup> Zelinsky Institute of Organic Chemistry RAS 47 Leninsky Ave, Moscow, 119991, Russia; chizhov@ioc.ac.ru (A.O.C.)

\* Correspondence: ala2004\_07@mail.ru (L.A.A.), tel. +7(926)547 1421; zzhgun@mail.ru (A.A.Z.), tel. +7 (916)9749769

## Table of contents

|                                                                                                       |          |
|-------------------------------------------------------------------------------------------------------|----------|
| Table S1 - Antibacterial activity                                                                     | Page S2  |
| Figure S1 - Enzymatic glycosylation of <i>N</i> <sup>4</sup> -dodecyl-6-methylcytosine ( <b>12b</b> ) | Page S3  |
| Figure S2 - NMR spectra of new compounds                                                              | Page S4  |
| Figure S3 - Mass spectra of new compounds                                                             | Page S30 |

Table S1. Minimal bacterial growth inhibitory concentration ( $\mu\text{g/ml}$ ) of  $N^4$ -alkylcytidine derivatives

| Bacteria<br>Compounds        |                                    |                                       |                                        |                                     |                                              |                                             |                                                    |
|------------------------------|------------------------------------|---------------------------------------|----------------------------------------|-------------------------------------|----------------------------------------------|---------------------------------------------|----------------------------------------------------|
|                              | <i>Bacillus subtilis</i> ATCC 6633 | <i>Staphylococcus aureus</i> FDA 209P | <i>Staphylococcus aureus</i> INA 00761 | <i>Micrococcus luteus</i> NCTC 8340 | <i>Leuconostoc mesenteroides</i> VKPM B-4177 | <i>Mycobacterium smegmatis</i> VKPM Ac 1339 | <i>Mycobacterium smegmatis</i> mc <sup>2</sup> 155 |
| <b>1b</b>                    | 16                                 | 16                                    | 16                                     | 16                                  | 16                                           | 16                                          | 16                                                 |
| <b>2a</b>                    | 64                                 | 32                                    | 32                                     | 32                                  | 32                                           | 32                                          | 32                                                 |
| <b>2b</b>                    | 8                                  | 8                                     | 8                                      | 8                                   | 8                                            | 16                                          | 16                                                 |
| <b>2c</b>                    | 16                                 | 16                                    | 8                                      | 8                                   | 16                                           | 8                                           | 16                                                 |
| <b>2d</b>                    | 32                                 | 8                                     | 8                                      | 16                                  | 16                                           | 32                                          | 32                                                 |
| <b>2e</b>                    | 4                                  | 4                                     | 8                                      | 16                                  | 16                                           | 16                                          | 16                                                 |
| <b>3a</b>                    | >6<br>4                            | >64                                   | >64                                    | >64                                 | >64                                          | >64                                         | >64                                                |
| <b>3b</b>                    | 8                                  | 8                                     | 8                                      | 32                                  | 8                                            | 32                                          | 32                                                 |
| <b>3c</b>                    | >6<br>4                            | >64                                   | >64                                    | >64                                 | >64                                          | >64                                         | >64                                                |
| <b>12a,12b</b>               | n/a                                | n/a                                   | n/a                                    | n/a                                 | n/a                                          | n/a                                         | n/a                                                |
| Antibiotics used in clinics* | AN 4                               | AN 2, CIP 4, OX 1                     | AN 30, CIP 4, OX 32                    | AN 1.7                              | VA>400                                       | AN 30 CIP 4, RFP 8, INZ 0.25                | AN 85 RFP 4, INZ 4                                 |

\*Amikacin (AN), Ciprofloxacin (CIP), Isoniazid (INZ), Rifampicin (RFP), Oxacillin (OX), Vancomycin (VA).

Figure S1. Enzymatic glycosylation of *N*<sup>4</sup>-dodecyl-6-methylcytosine (**12b**)

BT

Project Name: TESTLast\_1  
Reported by User: System

Breeze

| SAMPLE INFORMATION |                    |                  |                     |  |  |
|--------------------|--------------------|------------------|---------------------|--|--|
| Sample Name:       | MBf-67 19h + Osk-5 | Acquired By:     | System              |  |  |
| Sample Type:       | Unknown            | Date Acquired:   | 27.06.2023 11:54:02 |  |  |
| Vial:              | 1                  | Acq. Method:     | 100B_dual_280       |  |  |
| Injection #:       | 1                  | Date Processed:  | 27.06.2023 12:22:49 |  |  |
| Injection Volume:  | 10,00 ul           | Channel Name:    | 2487Channel 2       |  |  |
| Run Time:          | 25,00 Minutes      | Sample Set Name: |                     |  |  |
| Column Type:       |                    |                  |                     |  |  |

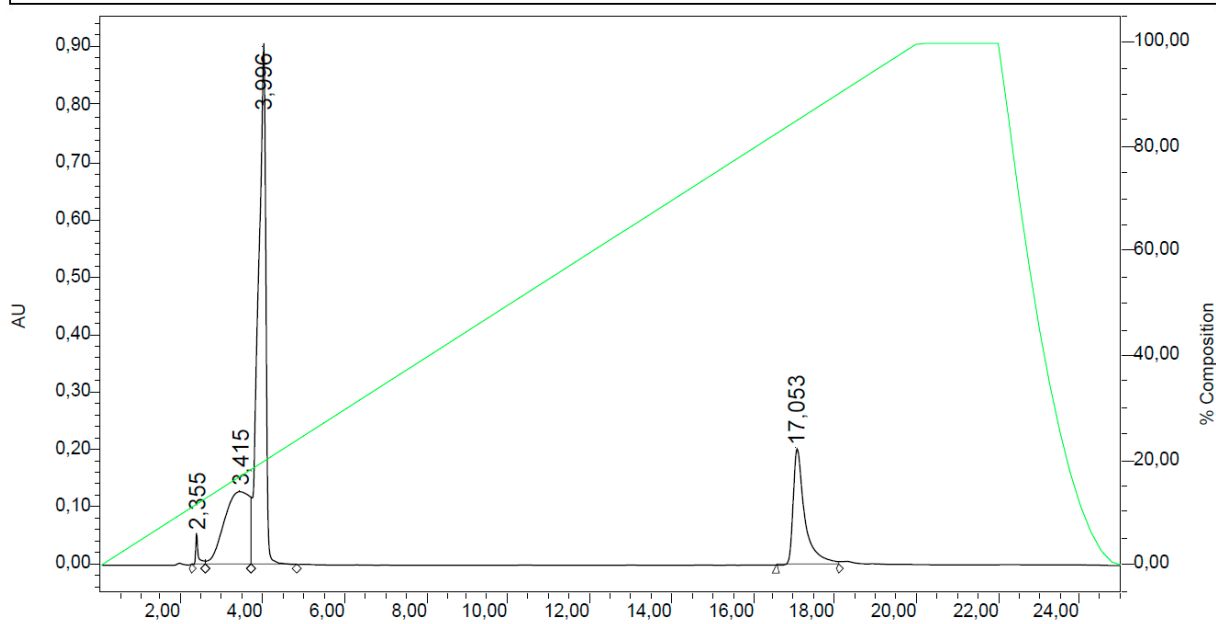

|   | RT<br>(min) | Area<br>(V*sec) | % Area | Height<br>(V) | % Height |
|---|-------------|-----------------|--------|---------------|----------|
| 1 | 2,355       | 271420          | 1,27   | 51987         | 4,03     |
| 2 | 3,415       | 5621924         | 26,28  | 127774        | 9,90     |
| 3 | 3,996       | 11401358        | 53,29  | 907931        | 70,38    |
| 4 | 17,053      | 4098894         | 19,16  | 202367        | 15,69    |

Figure S1. Chromatogram of reaction mixture with purine nucleoside phosphorylase (PNP). Reaction involving adenosine (peak Rt 3.9 minutes) and *N*<sup>4</sup>-dodecyl-6-methylcytosine (**12b**) (Rt 17.0 minutes). Adenine is also present in the reaction mixture (Rt 3.4 minutes), the peak is broadened due to the presence of DMF.

Figure S2. NMR spectra of new compounds

1) *N*<sup>4</sup>-decyl-5-methylcytidine (2a)

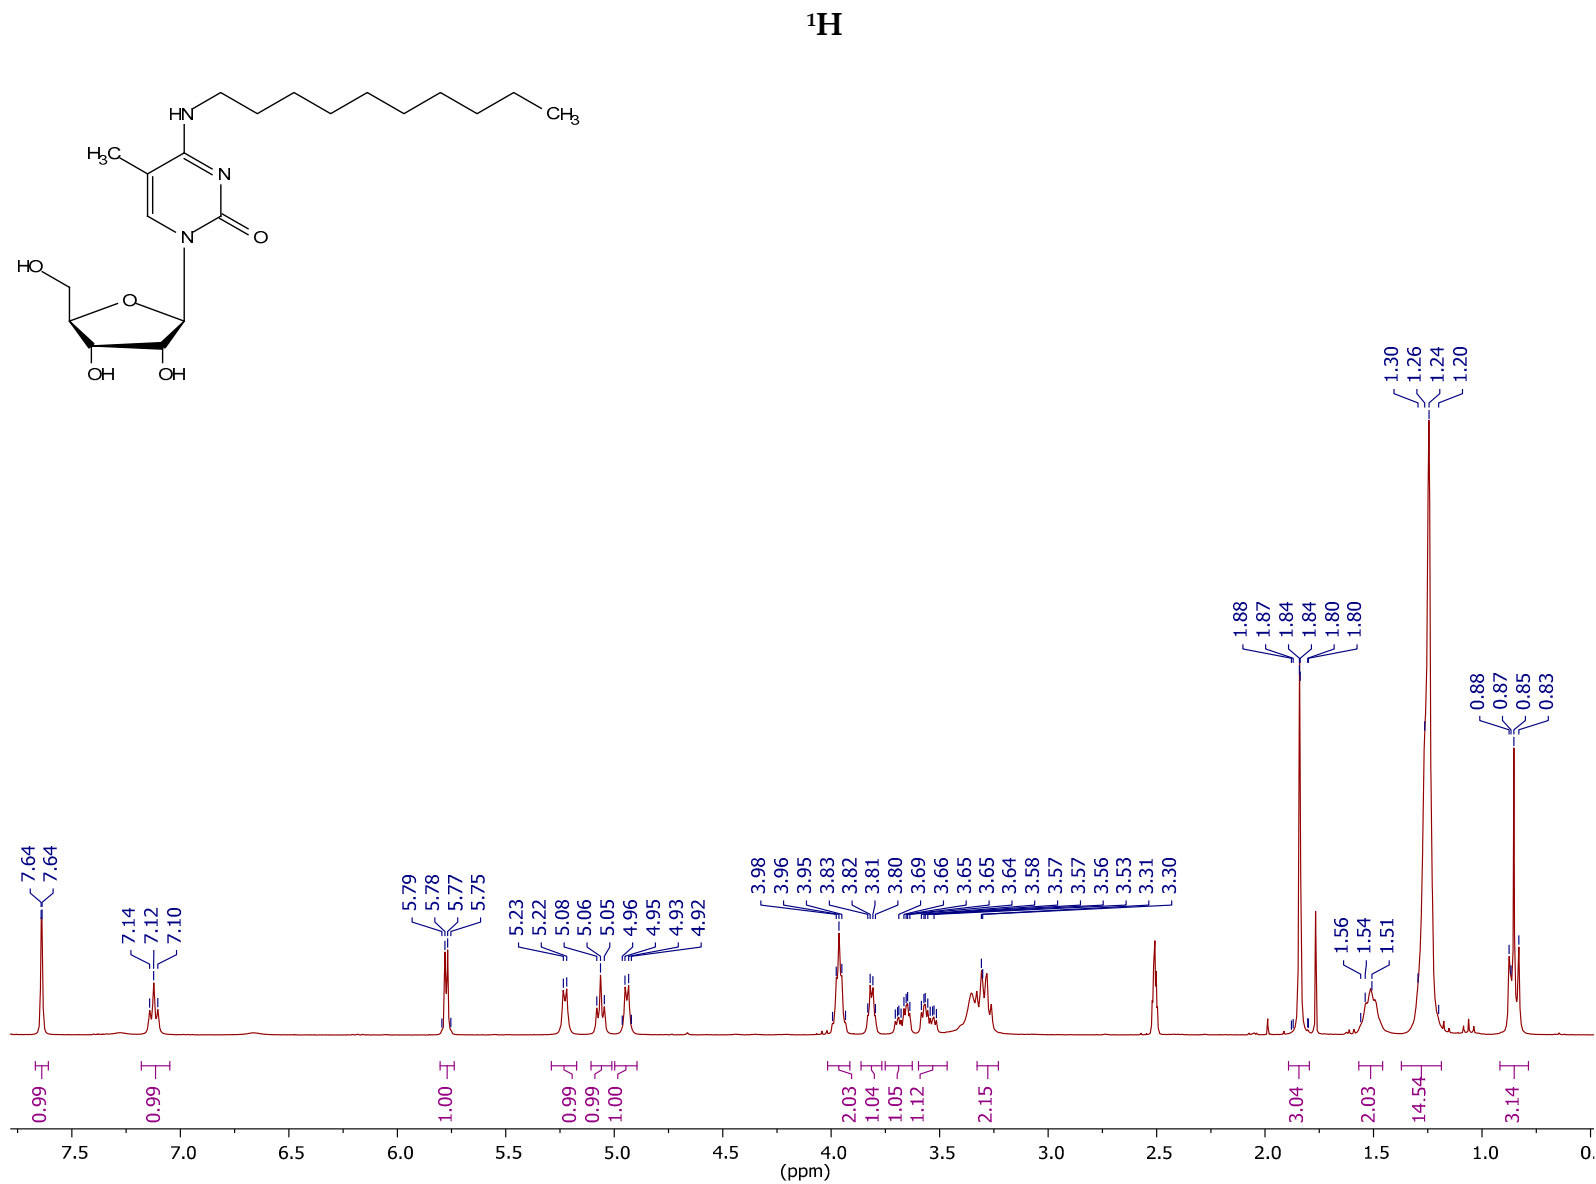



<sup>13</sup>C

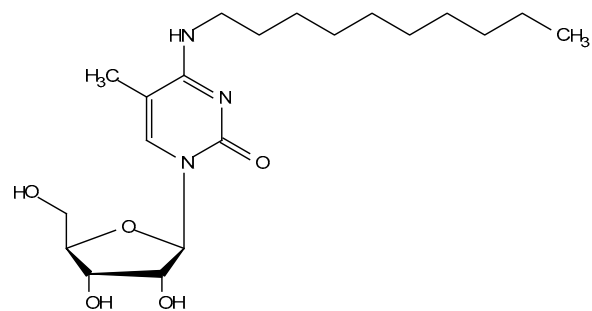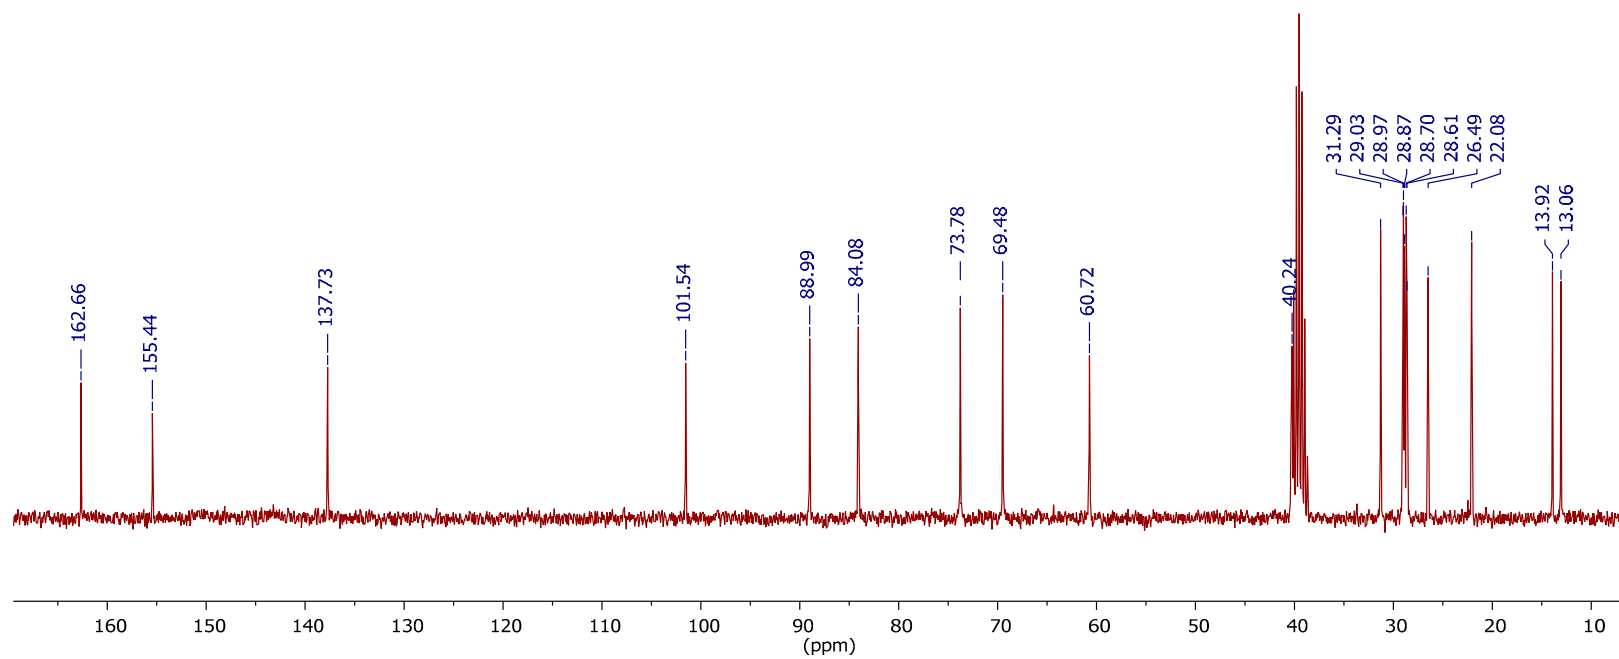

2) *N*<sup>4</sup>-dodecyl-5-methylcytidine (2b)

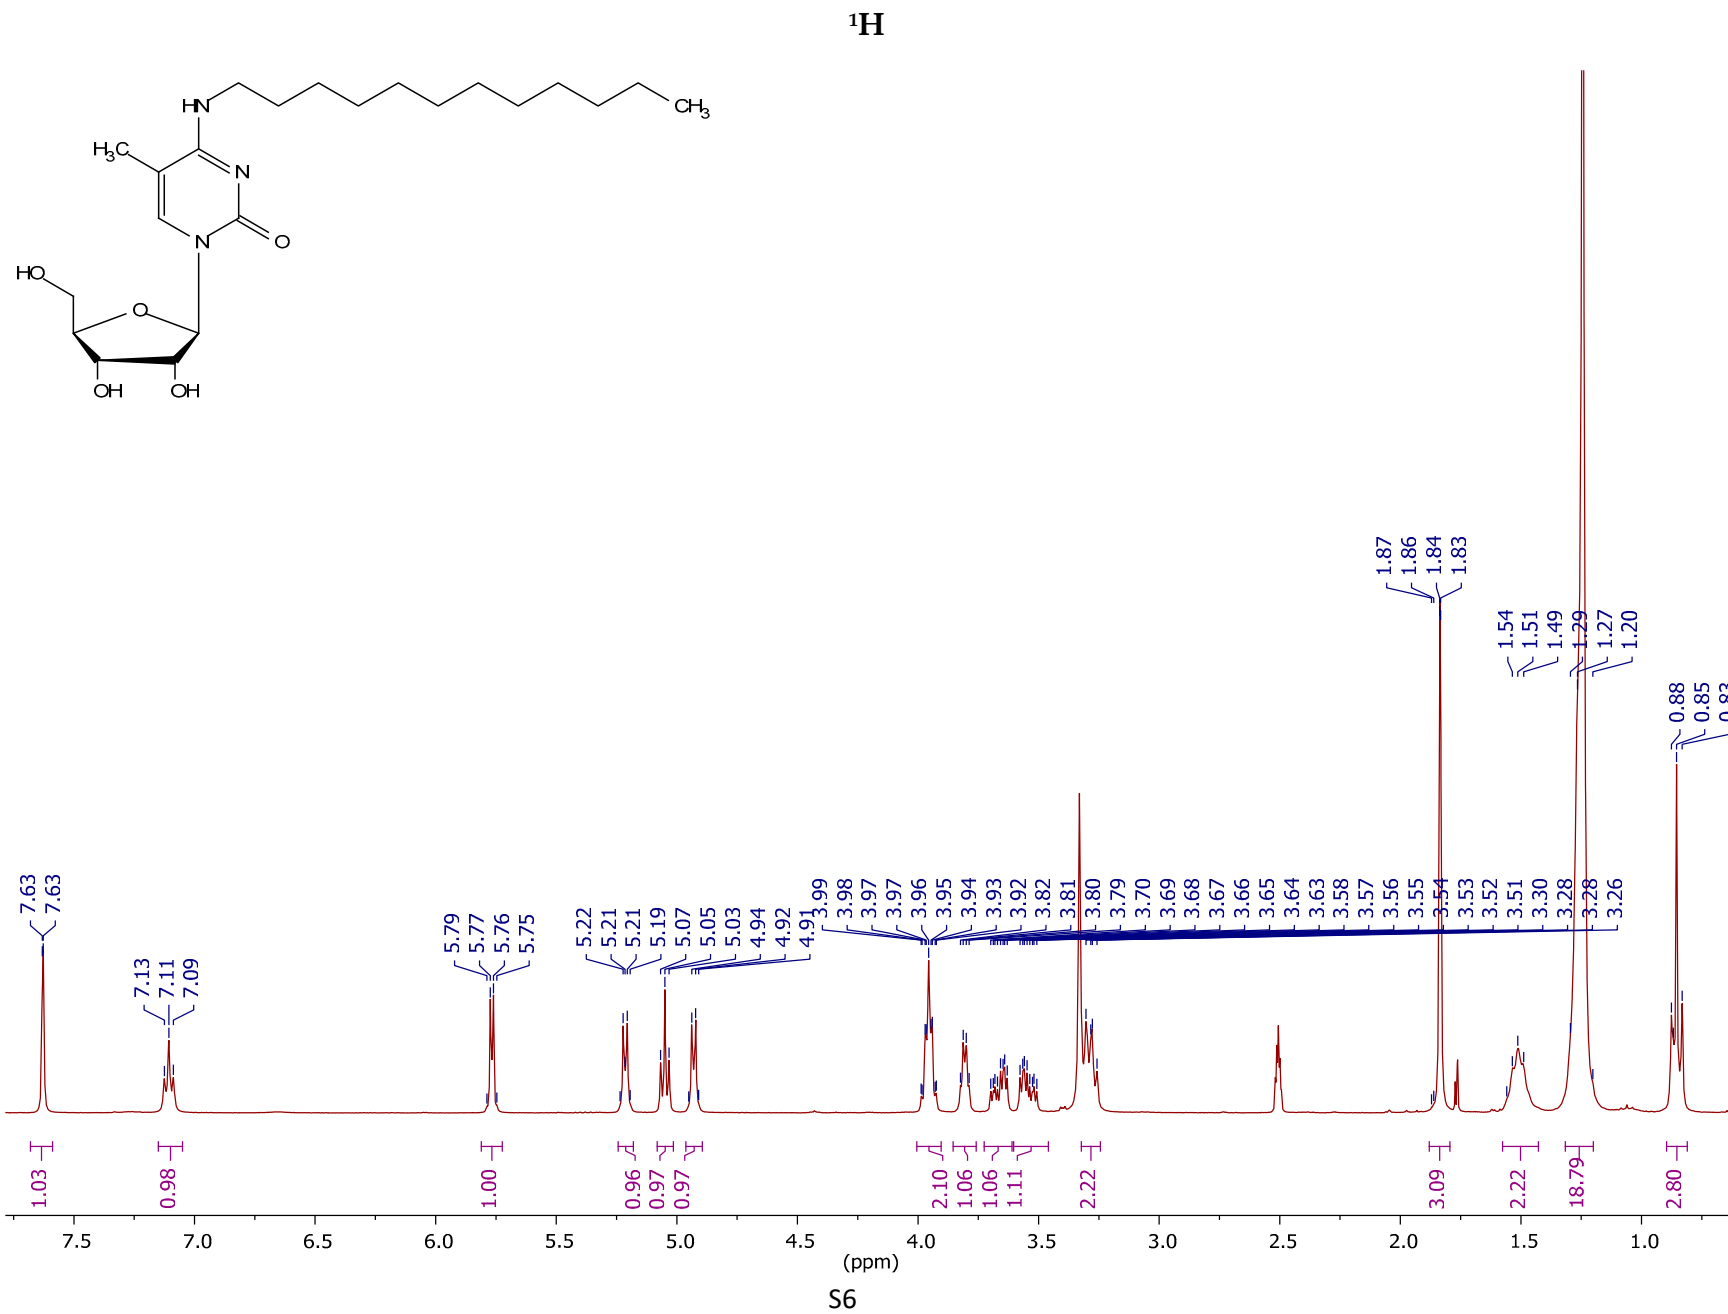

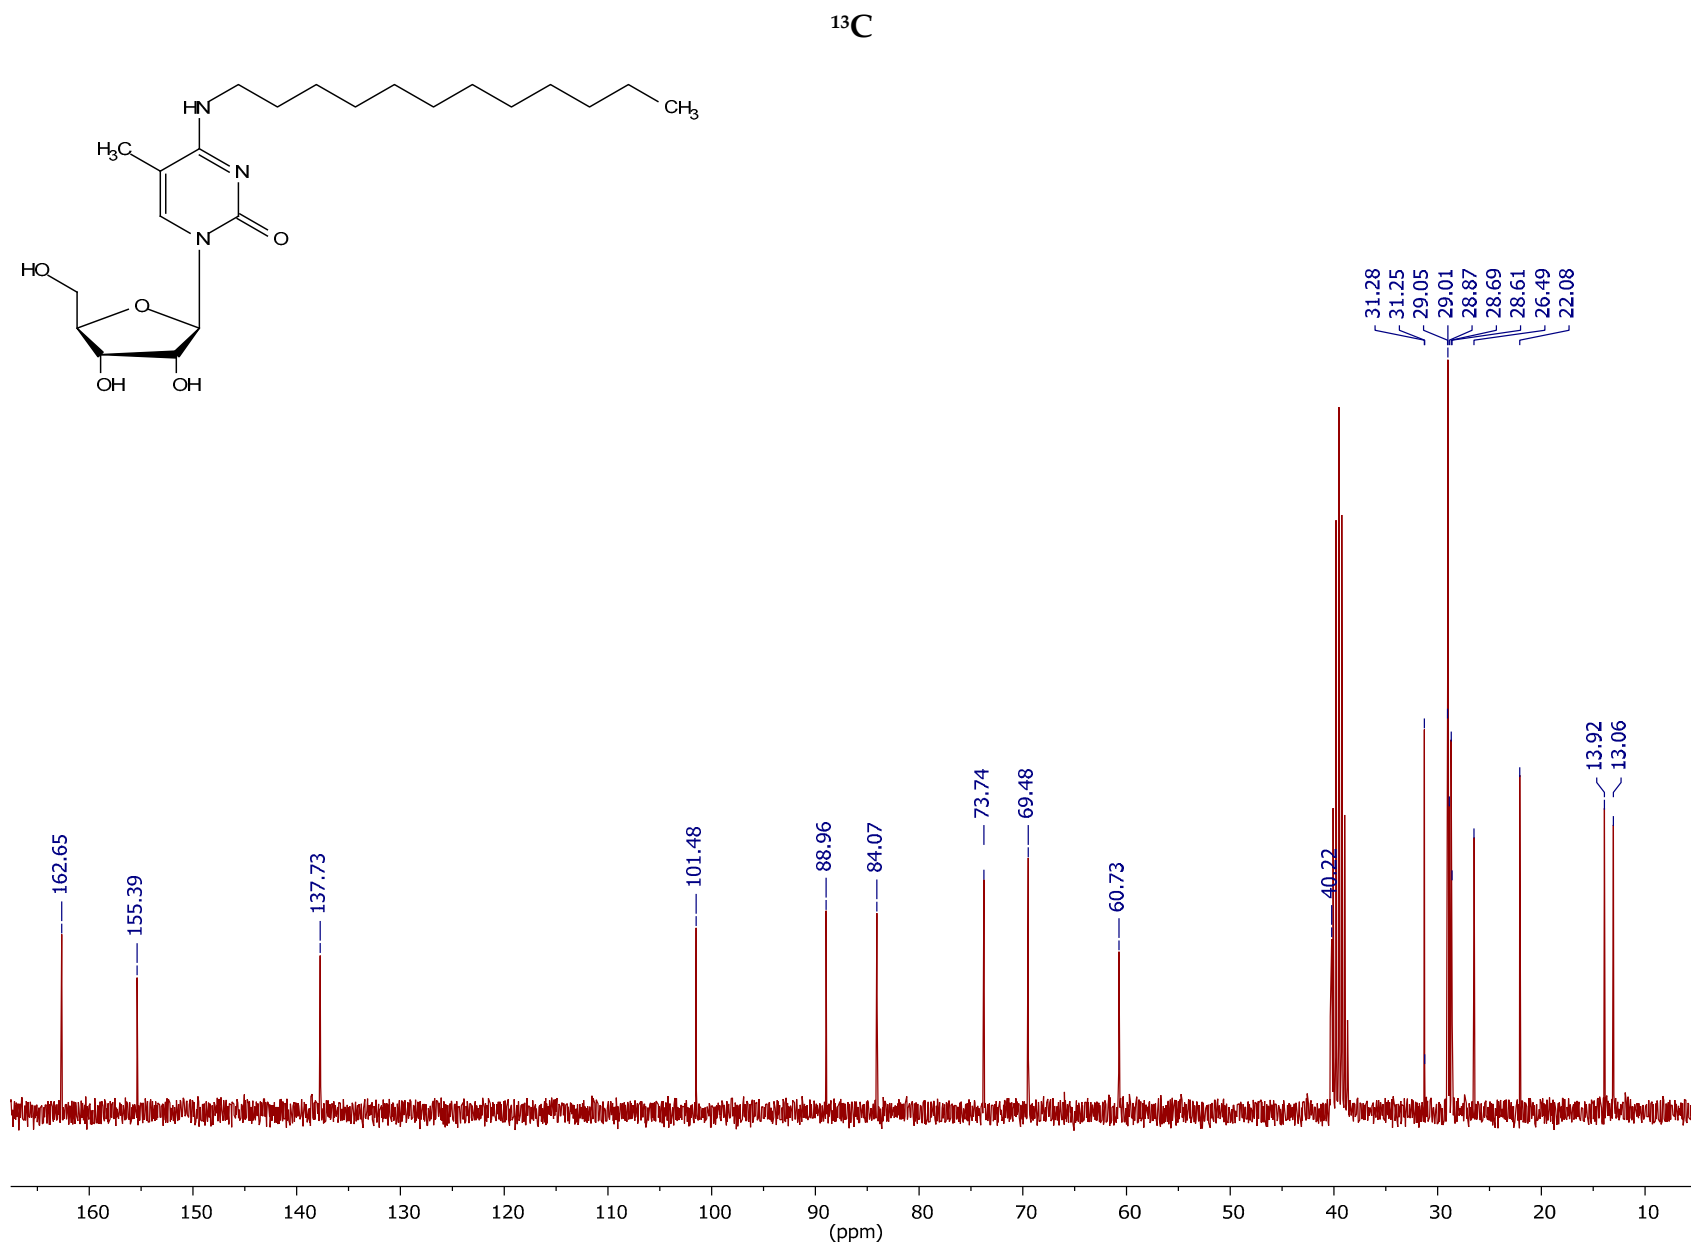

### 3) *N*<sup>4</sup>-tetradecyl-5-methylcytidine (2c)

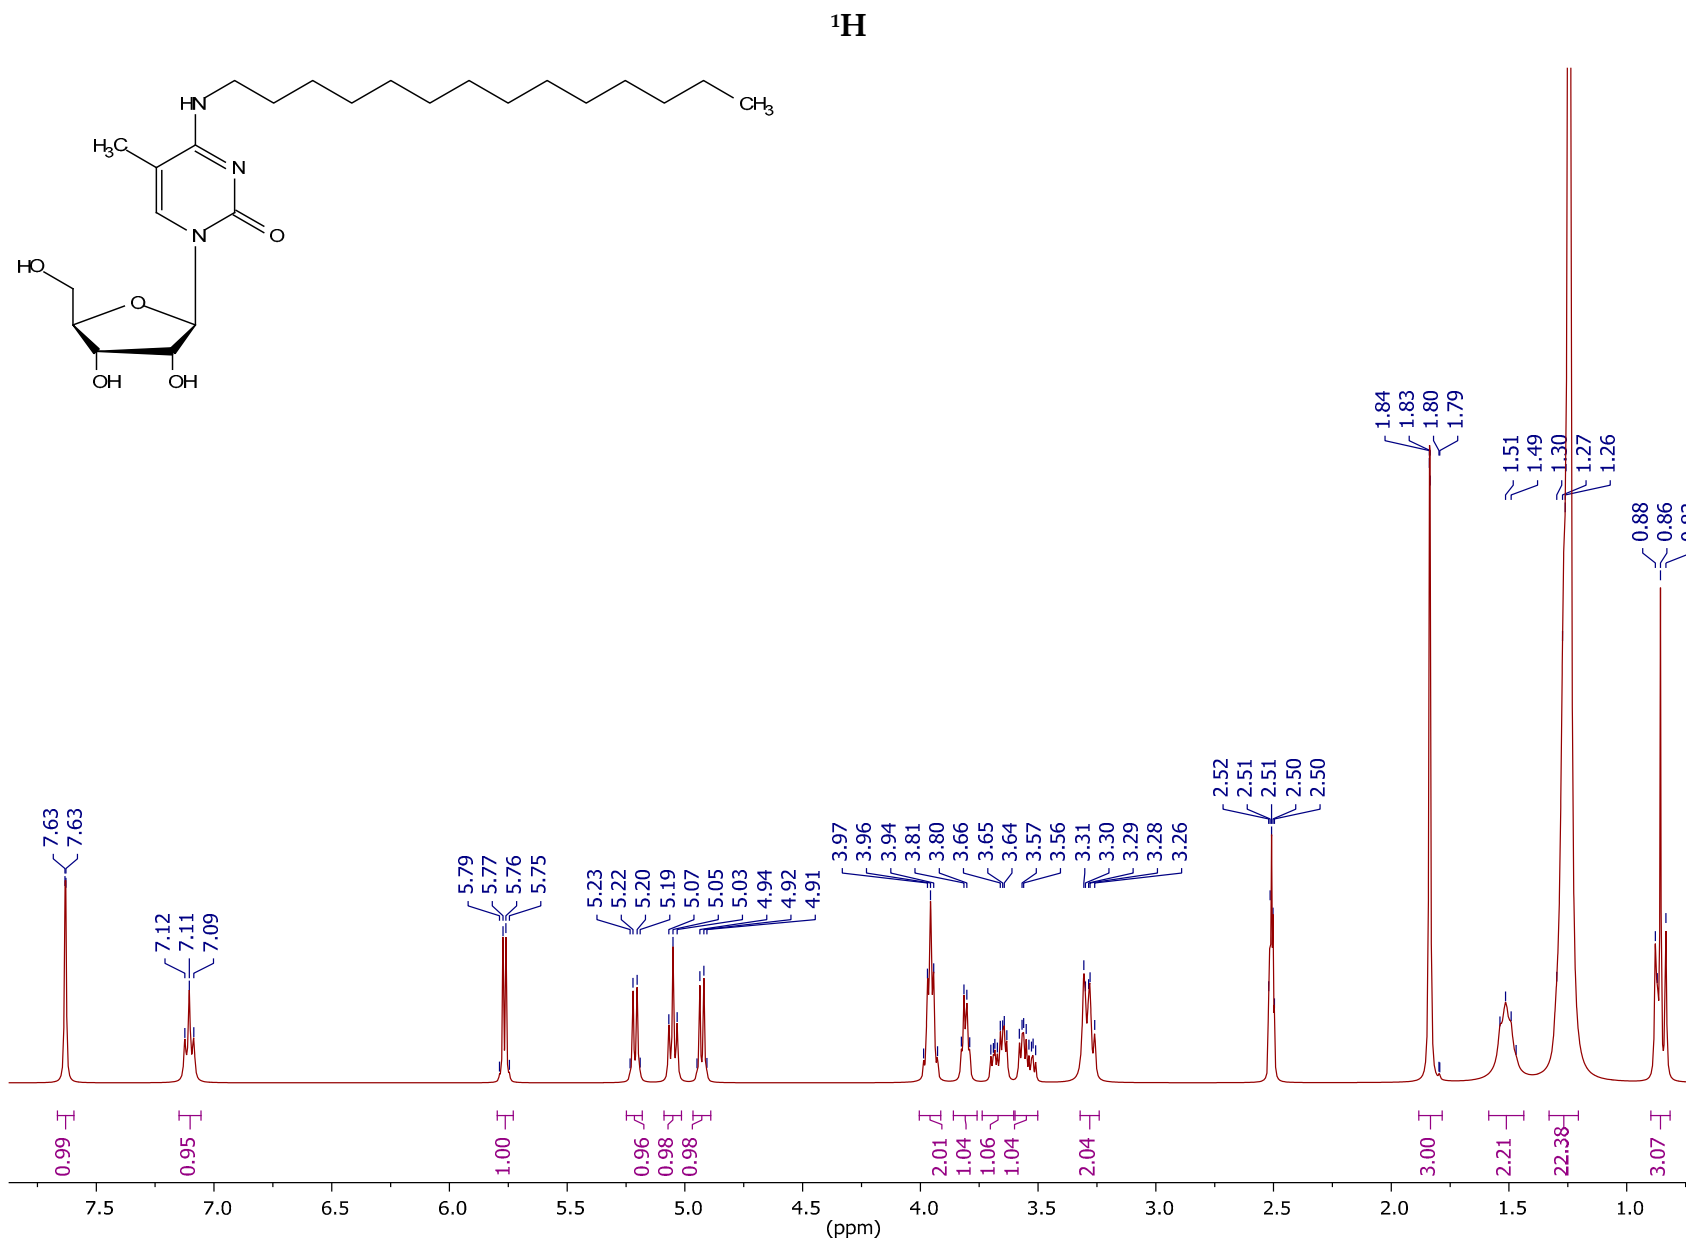

<sup>13</sup>C

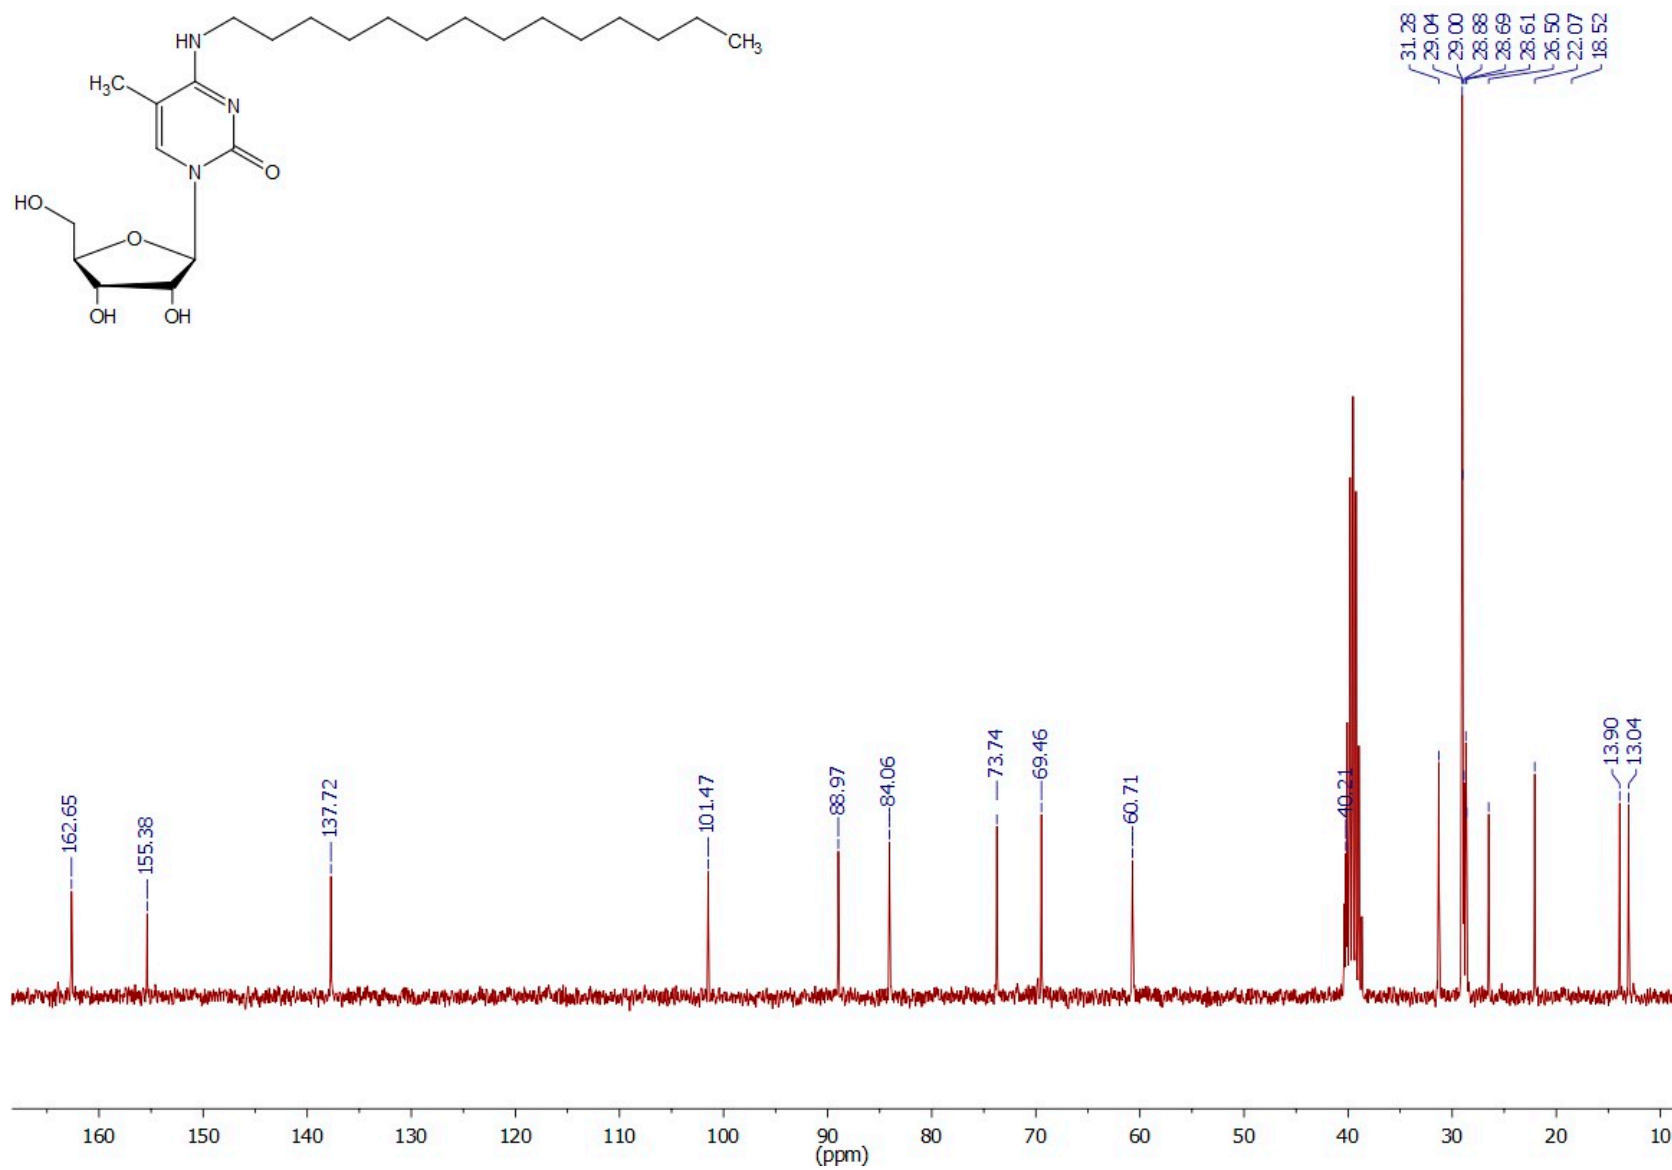

4) *N*<sup>4</sup>-dodecylcytidine (2d)

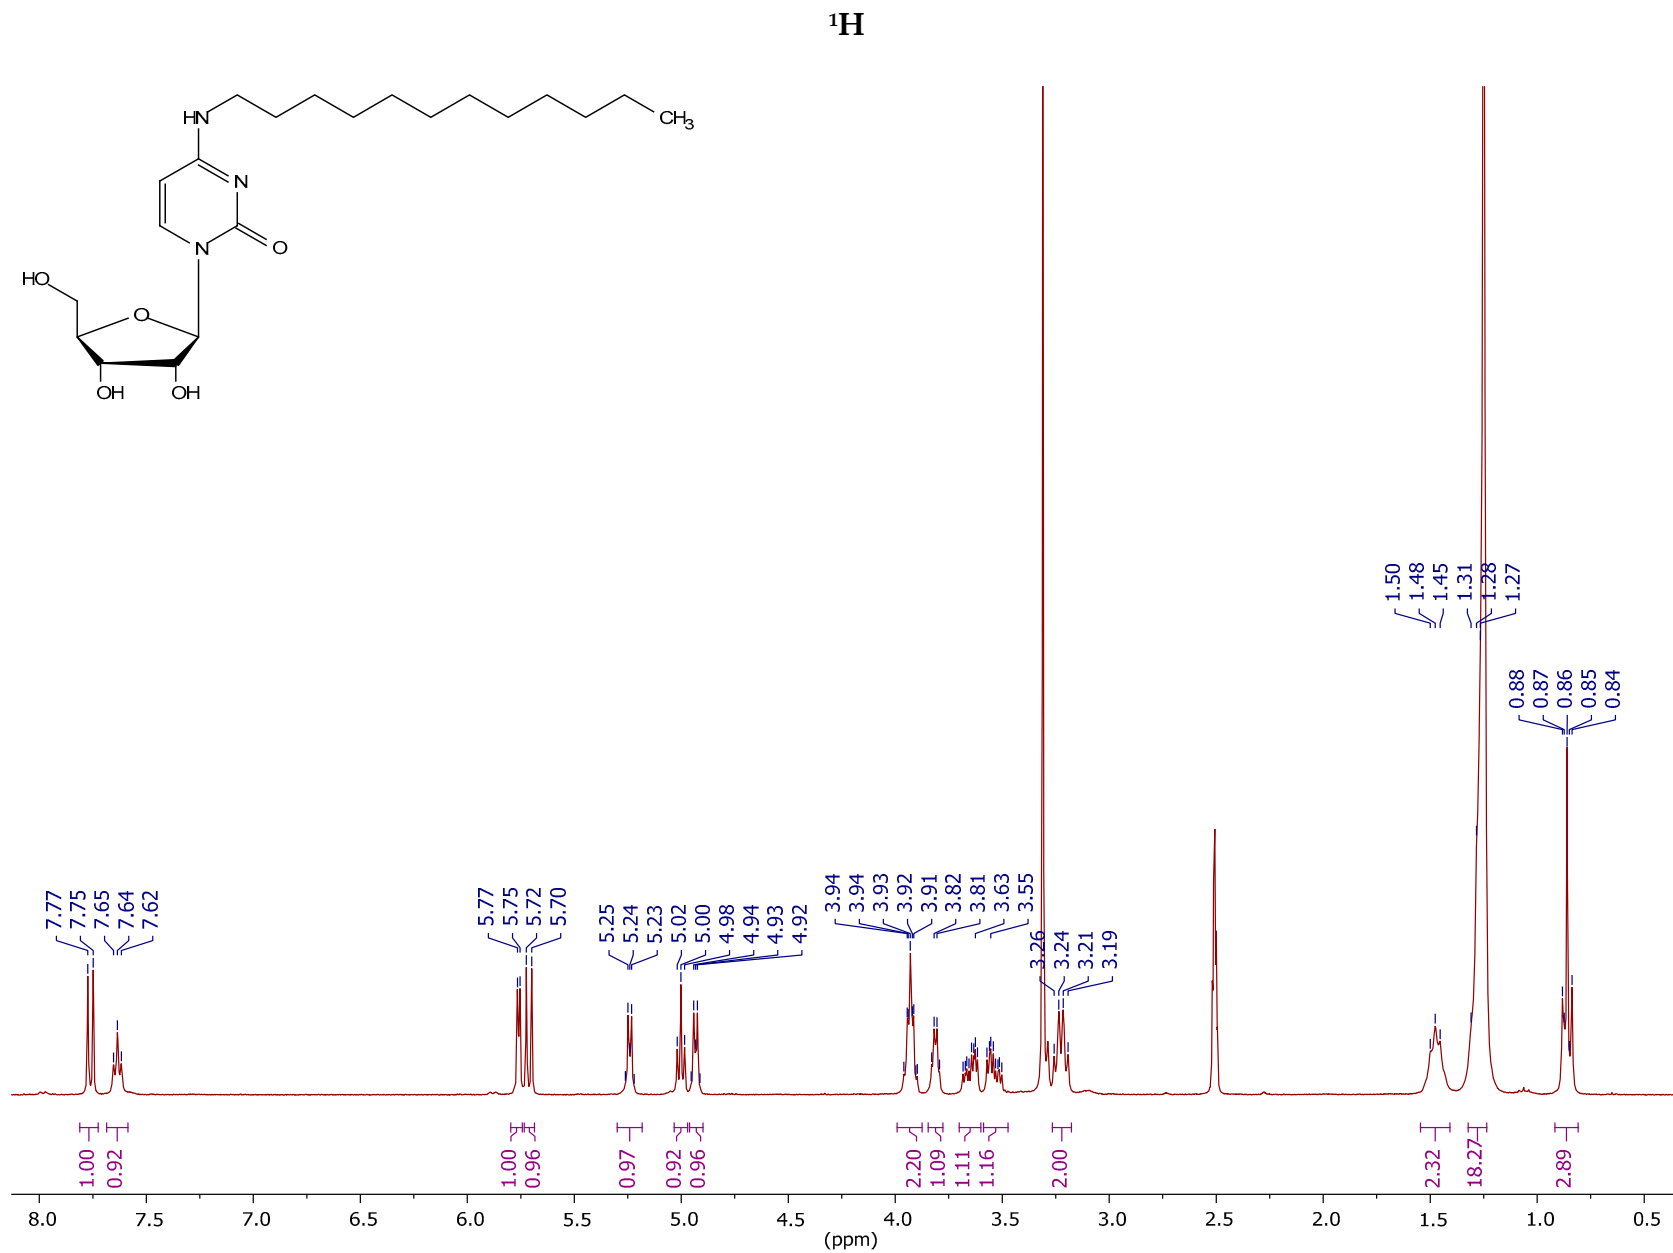

<sup>13</sup>C

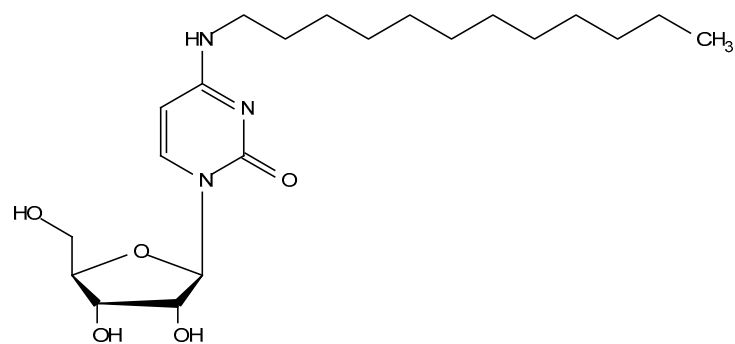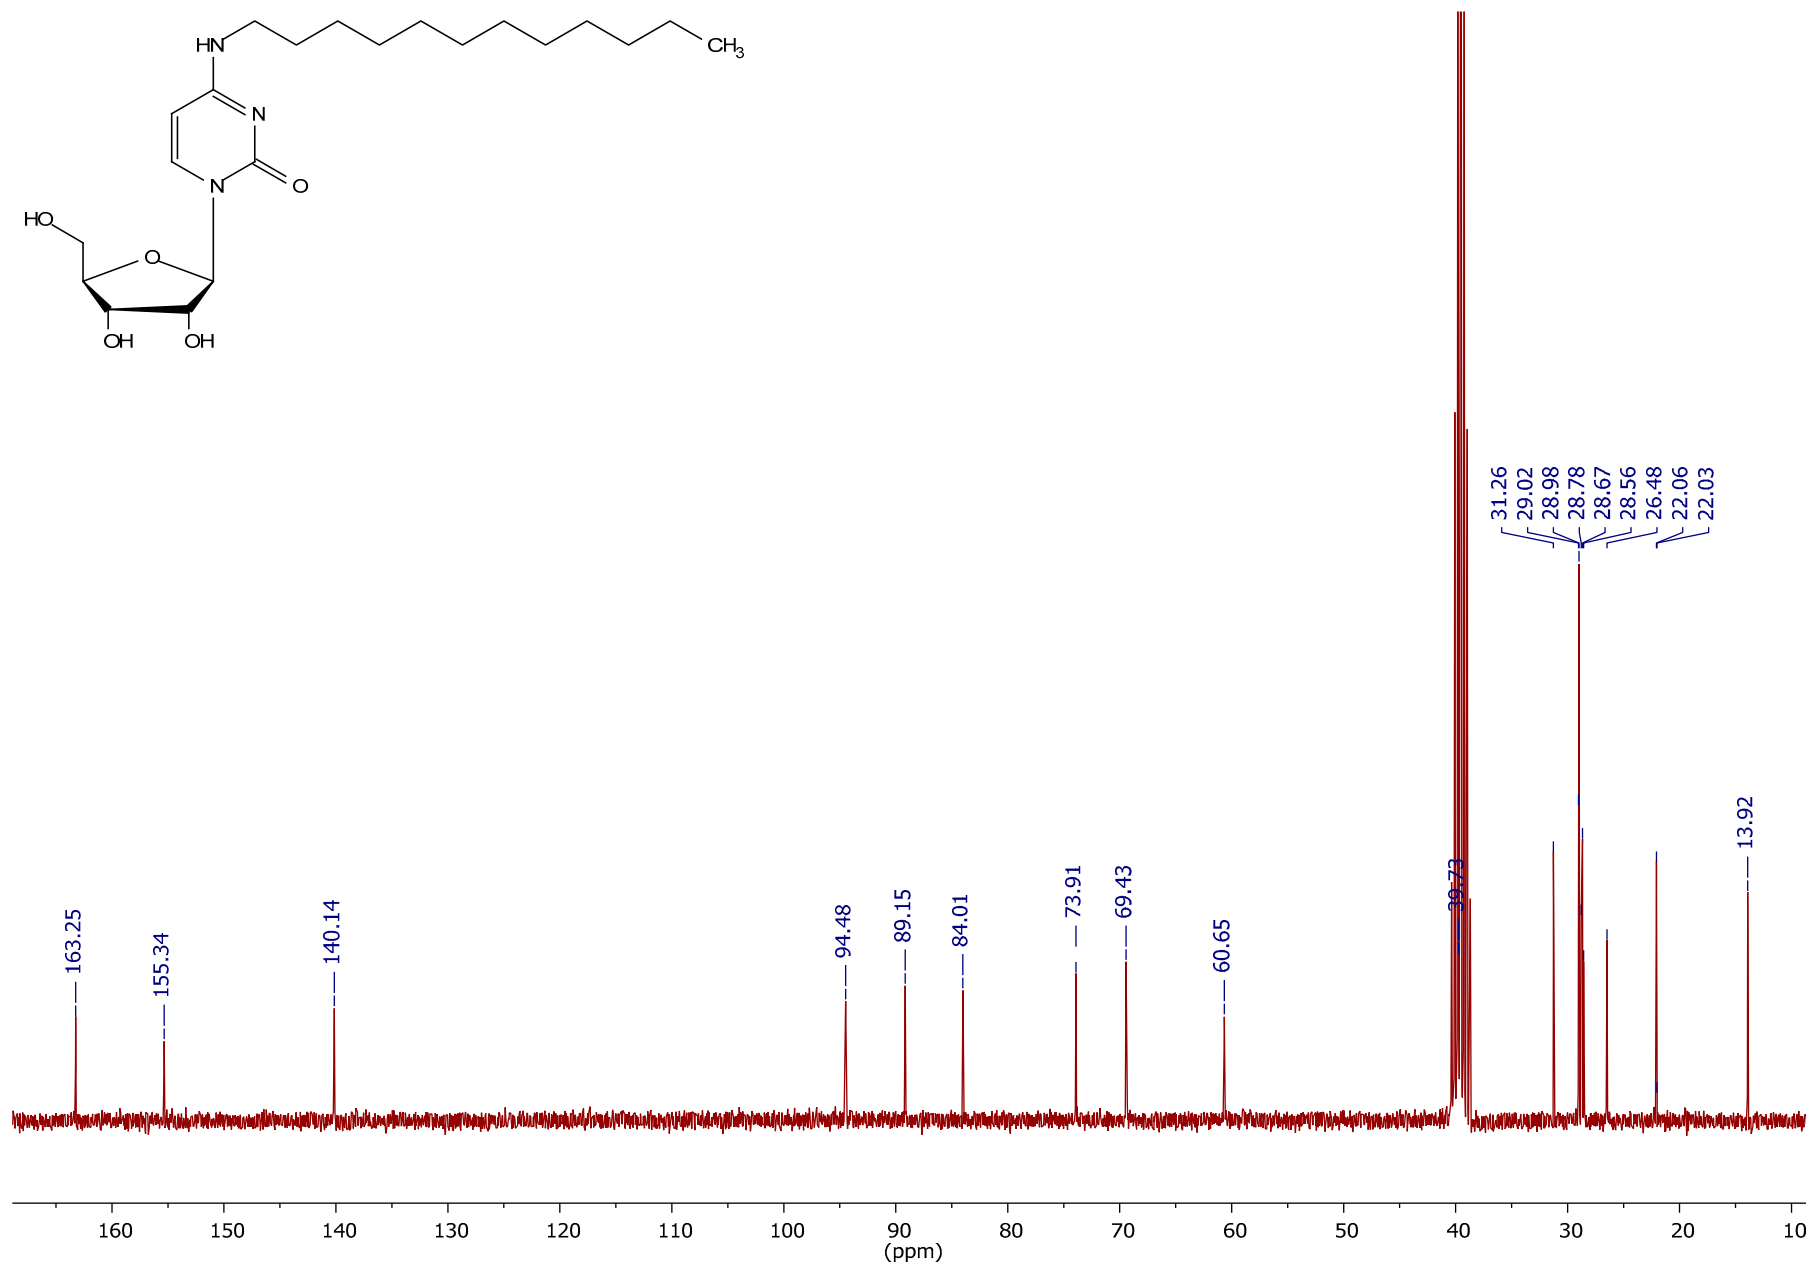

S11

5) *N*<sup>4</sup>-tetradecylcytidine (2e)

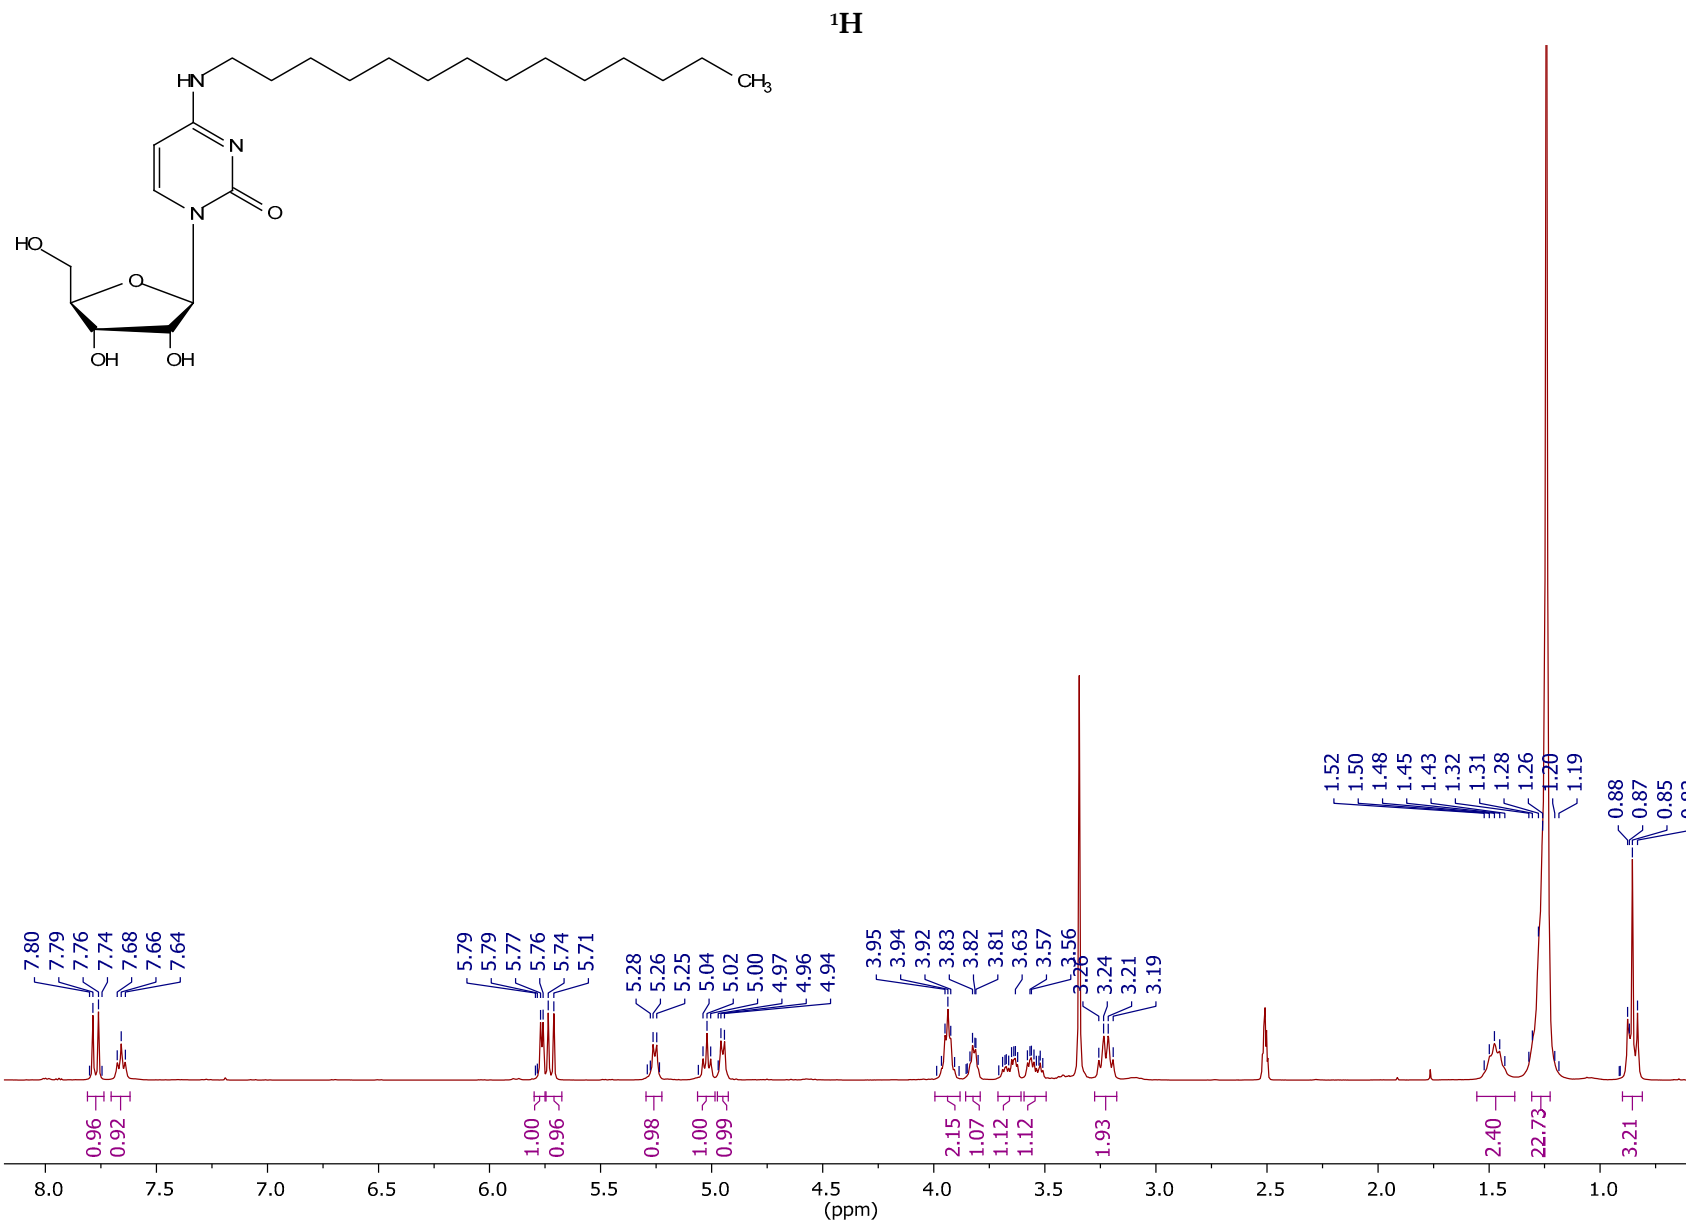



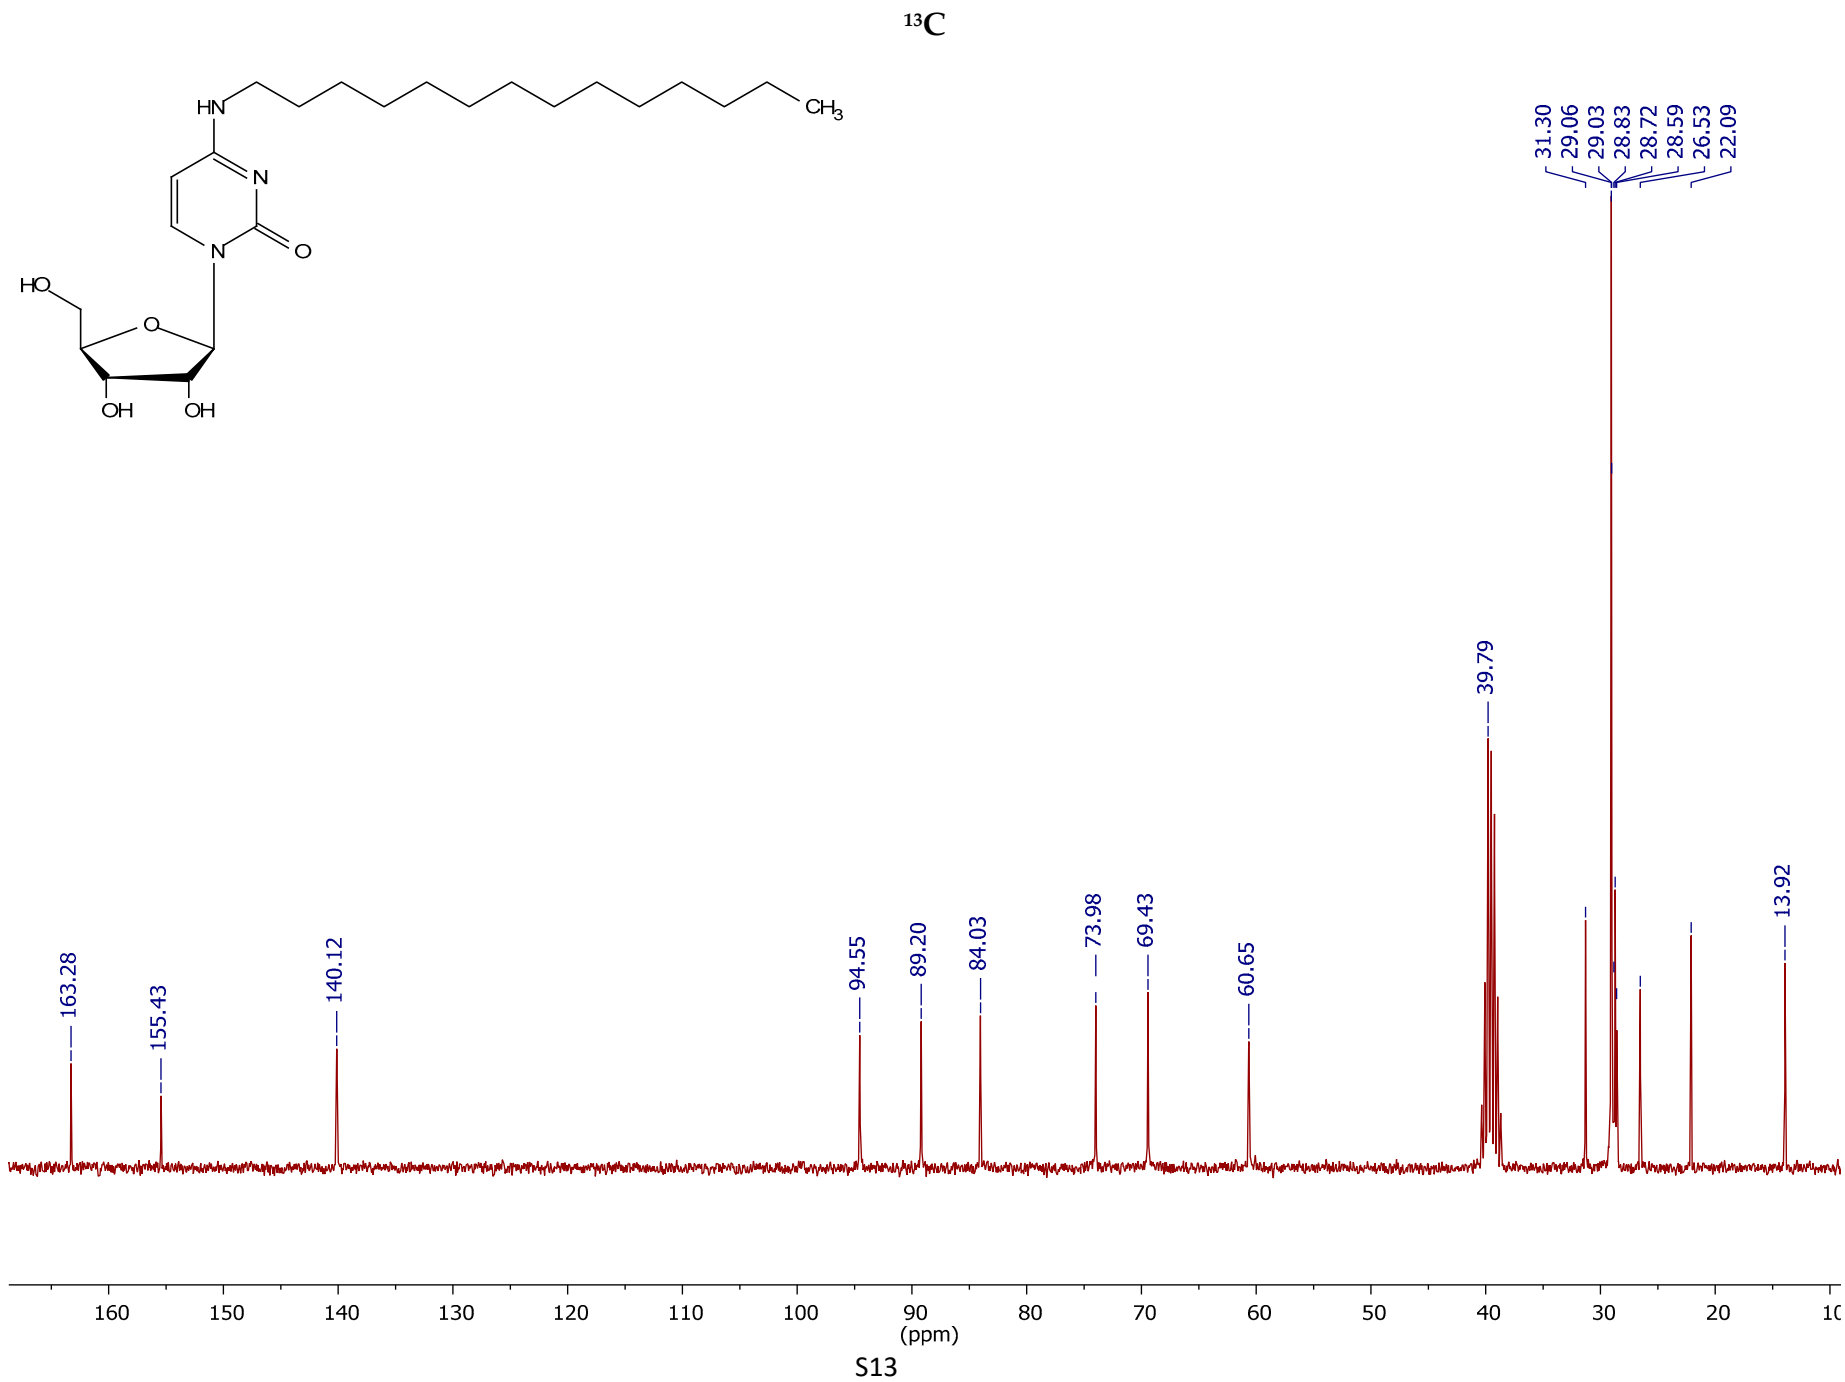

6) *N*<sup>4</sup>-Decyl-6-methylcytidine (3a)

<sup>1</sup>H

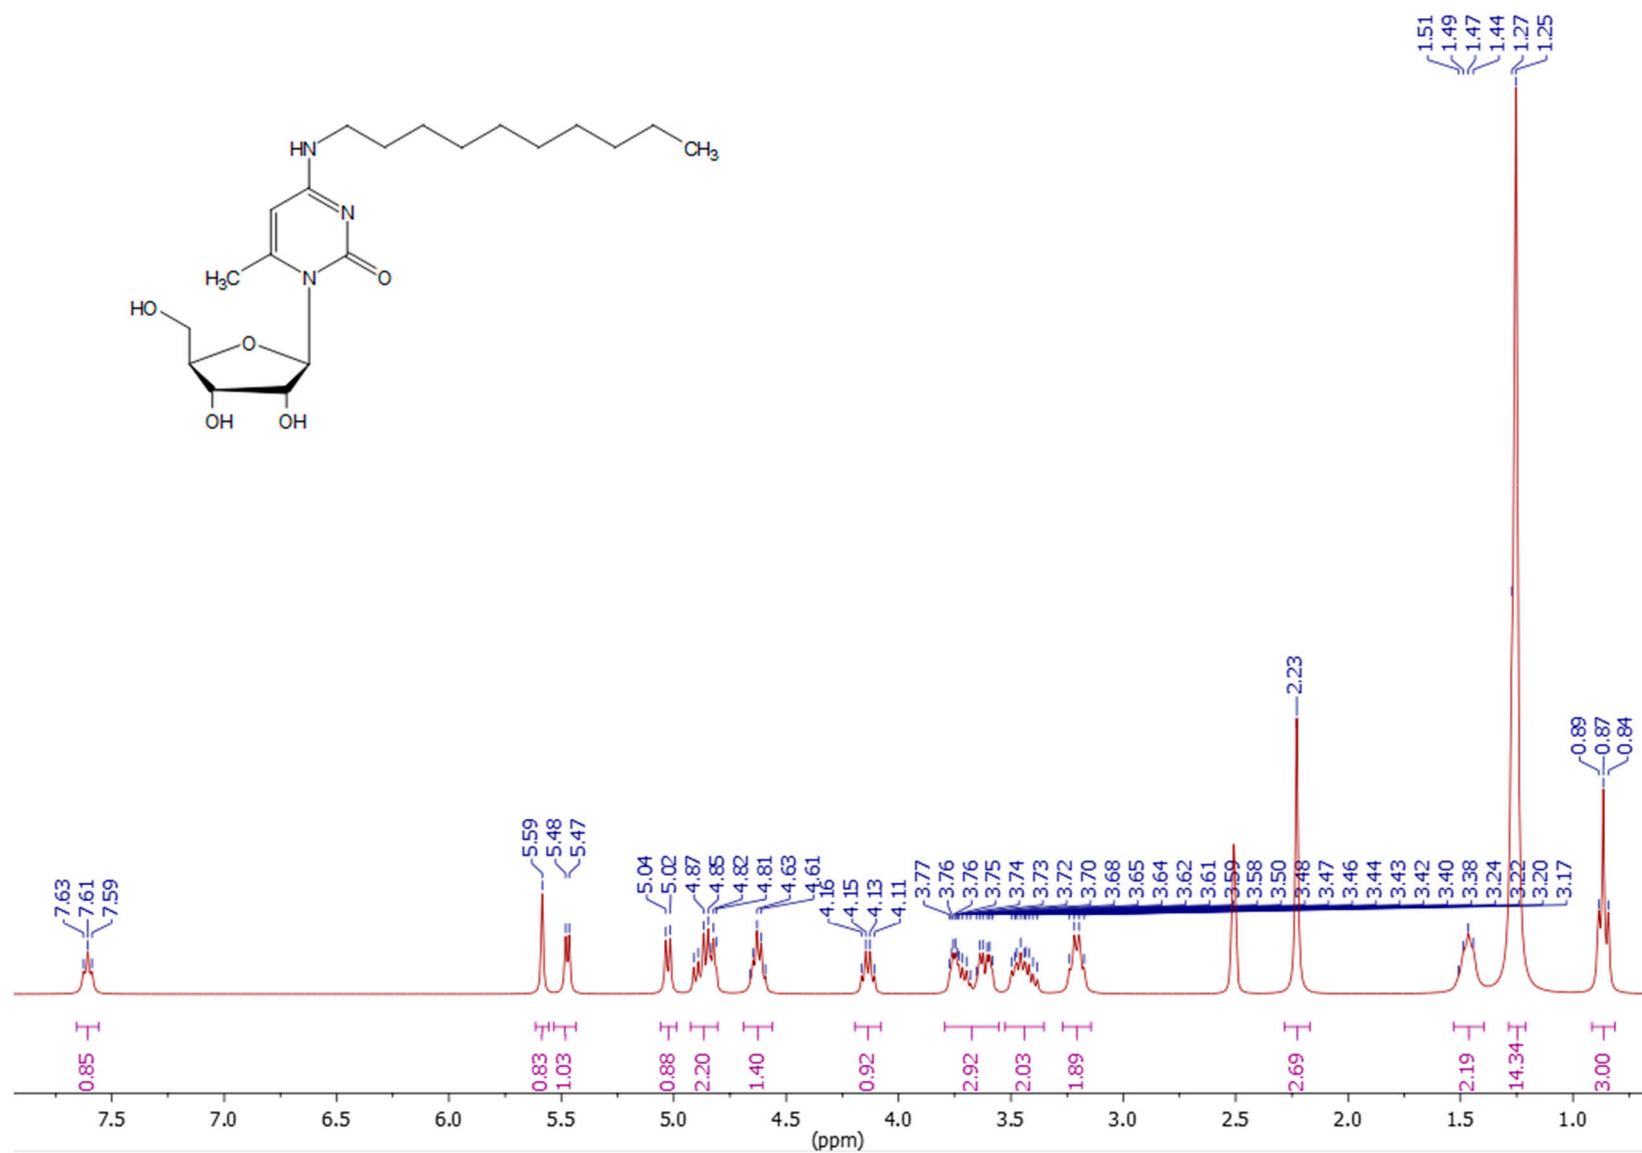

$^{13}\text{C}$

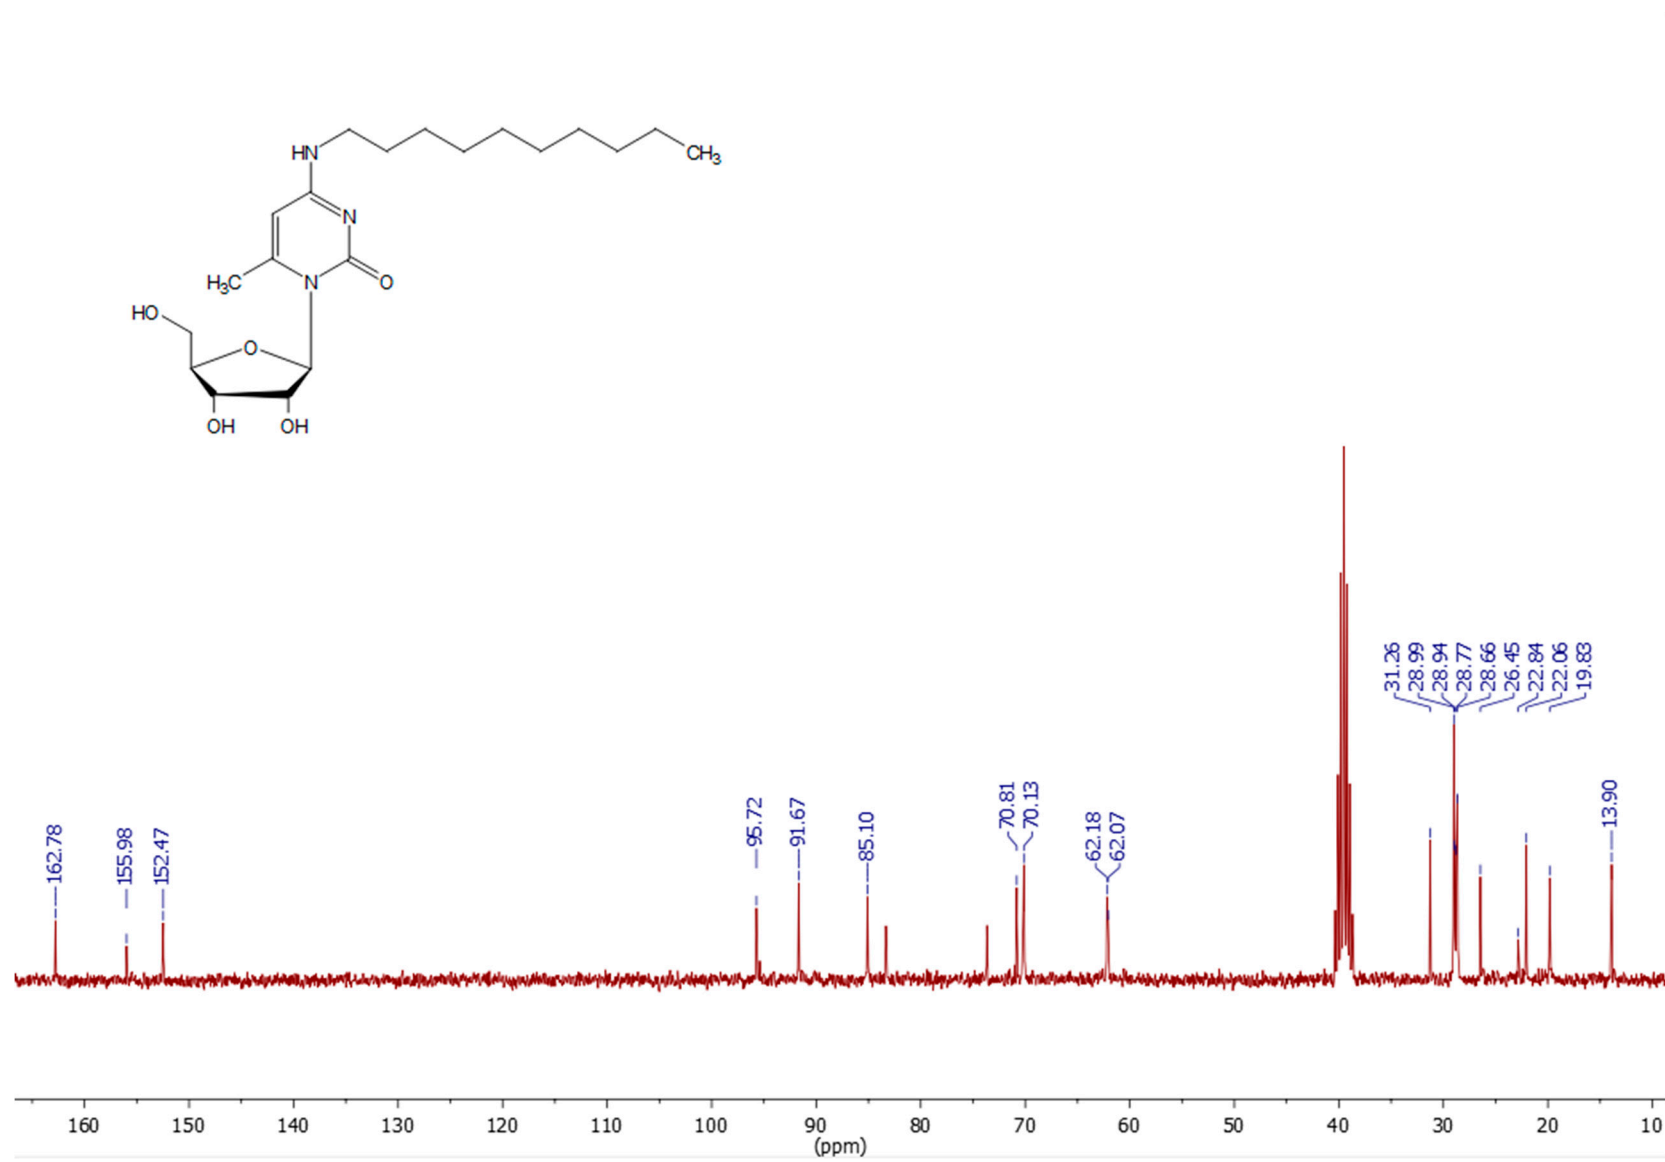

S15

7) *N*<sup>4</sup>-Dodecyl-6-methylcytidine (3b)

<sup>1</sup>H

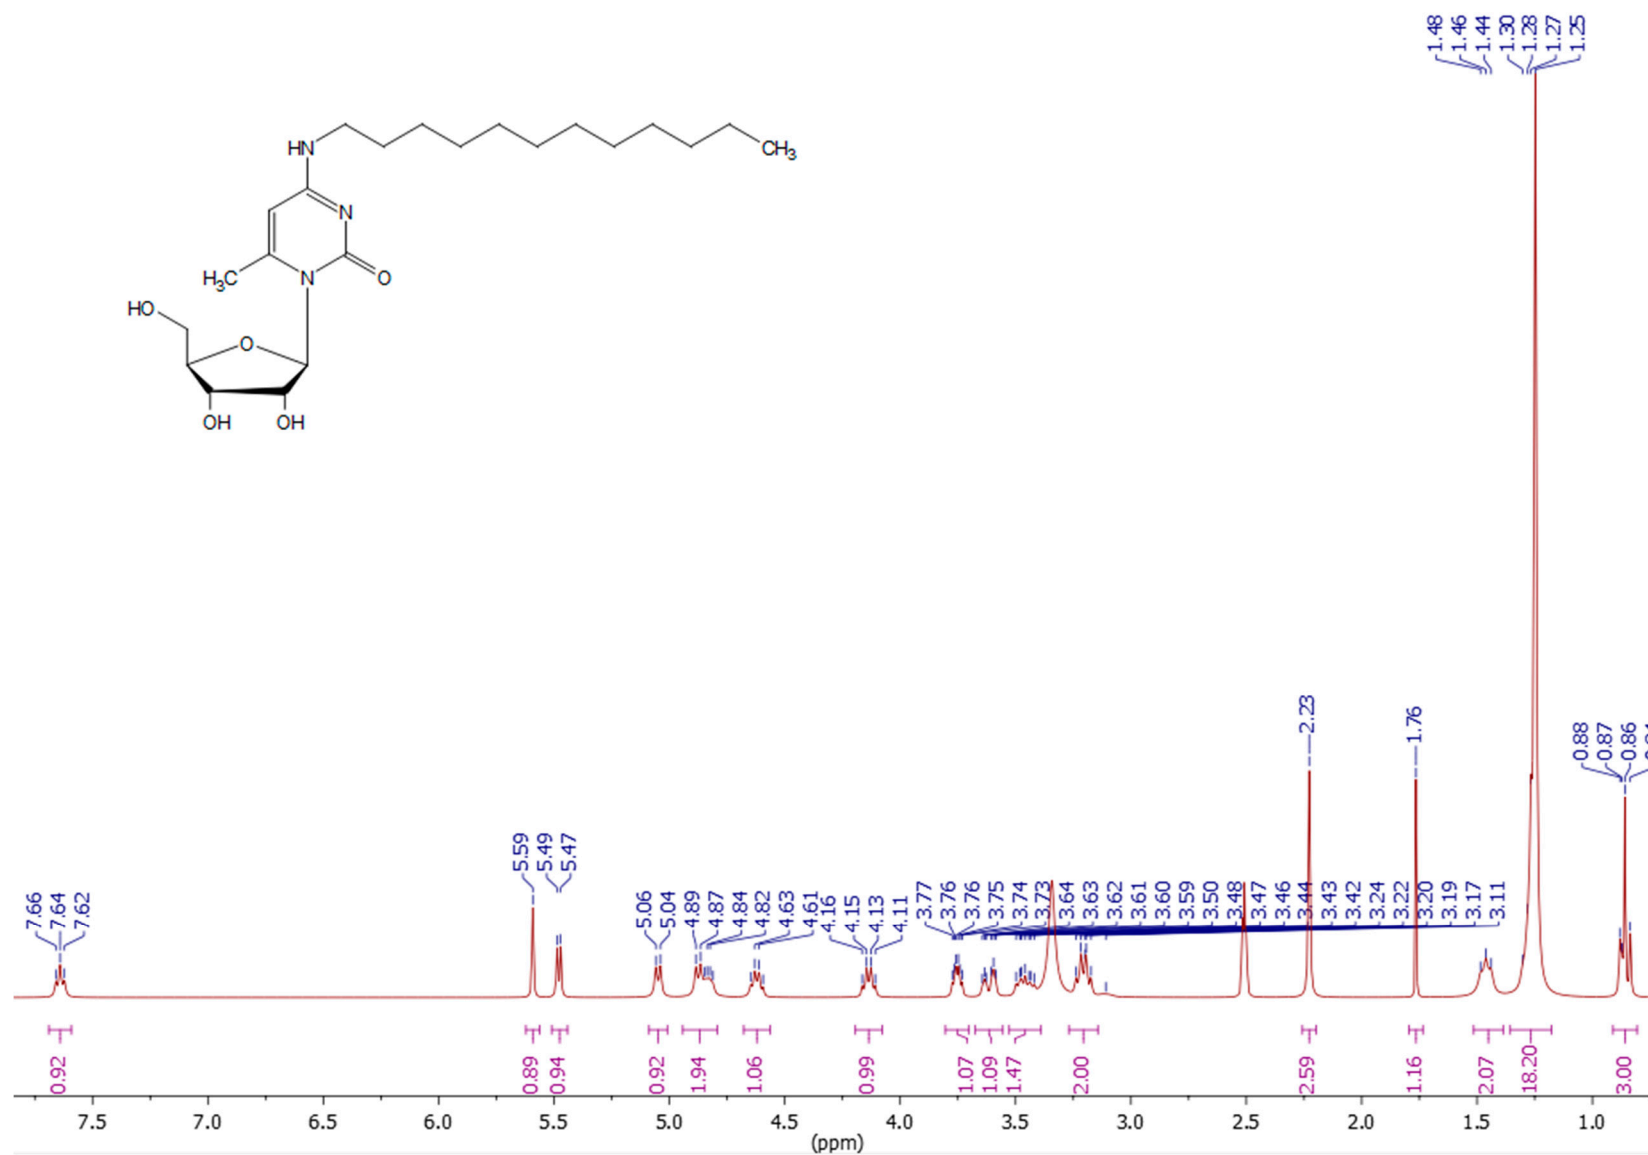

$^{13}\text{C}$

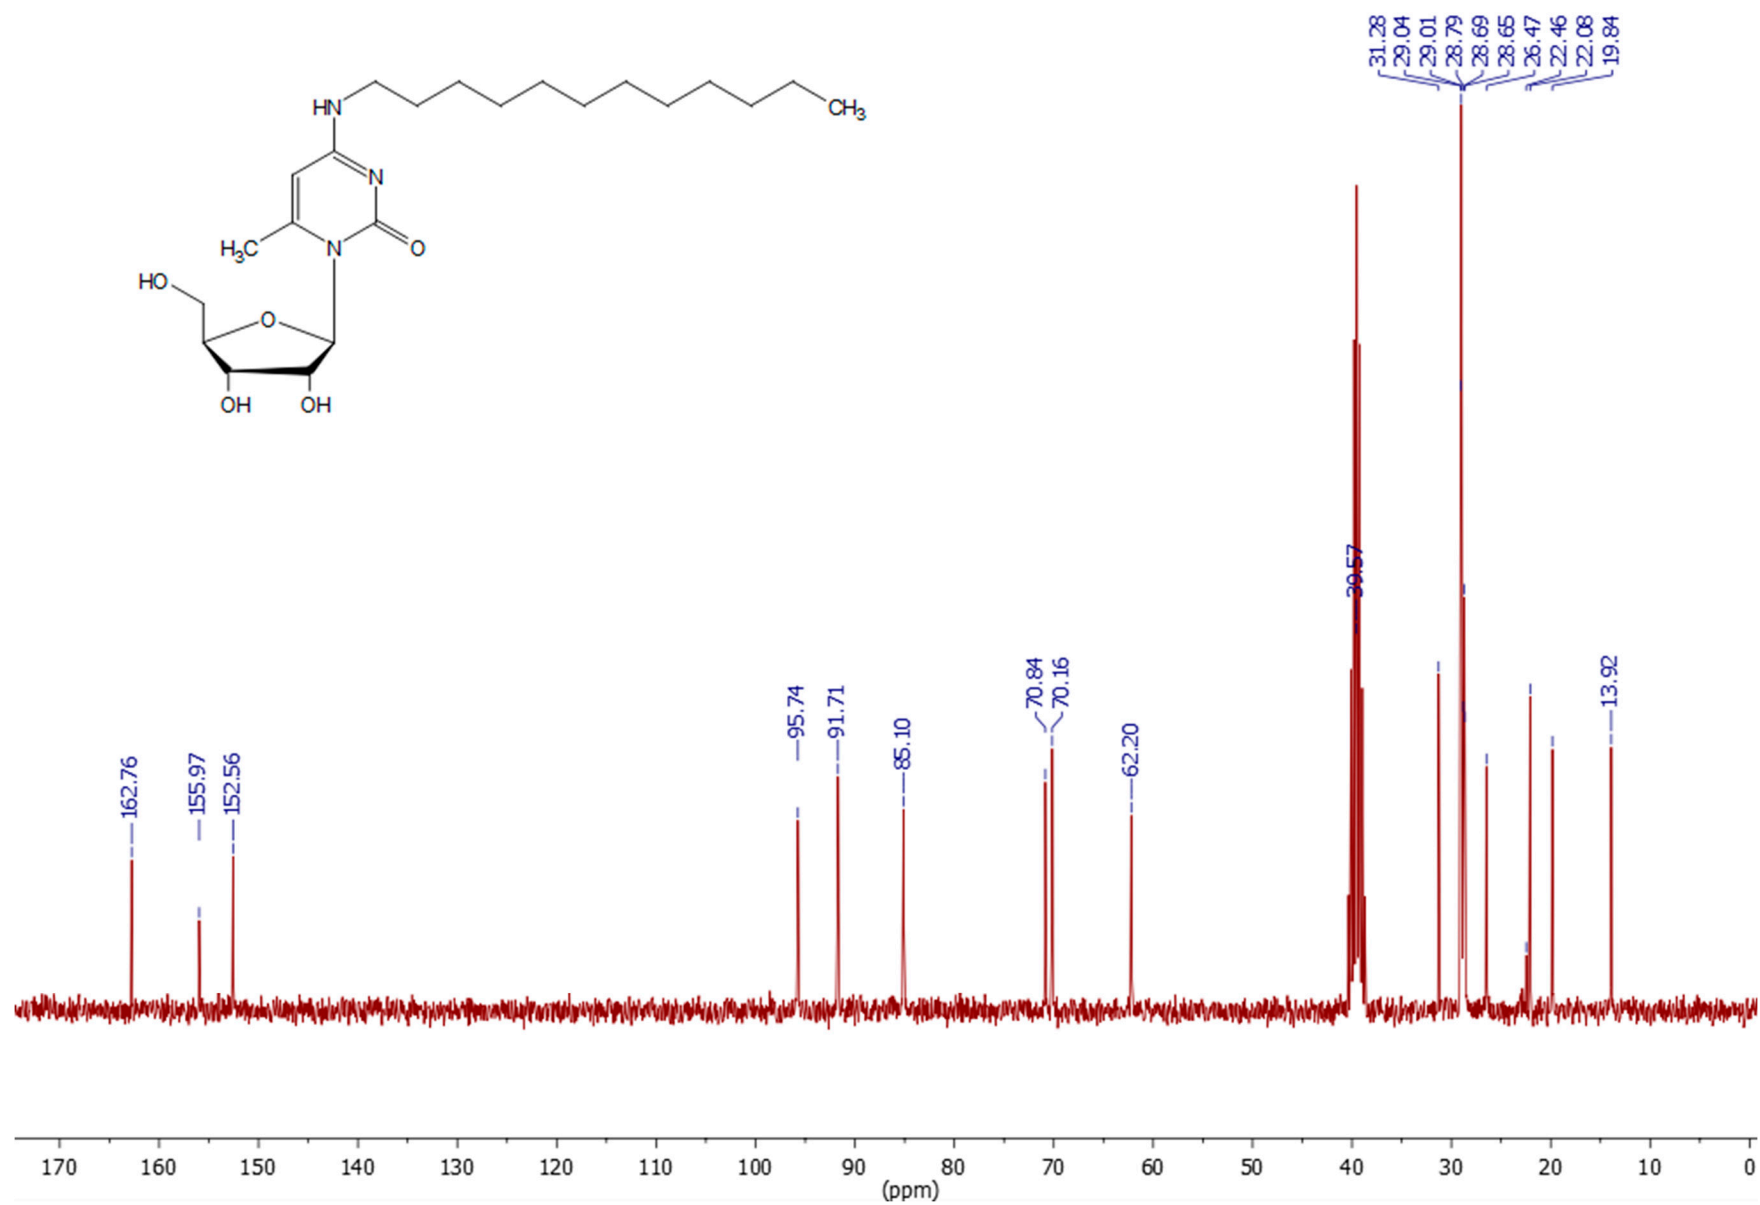

S17

8) *N*<sup>4</sup>-Tetradecyl-6-methylcytidine (3c)

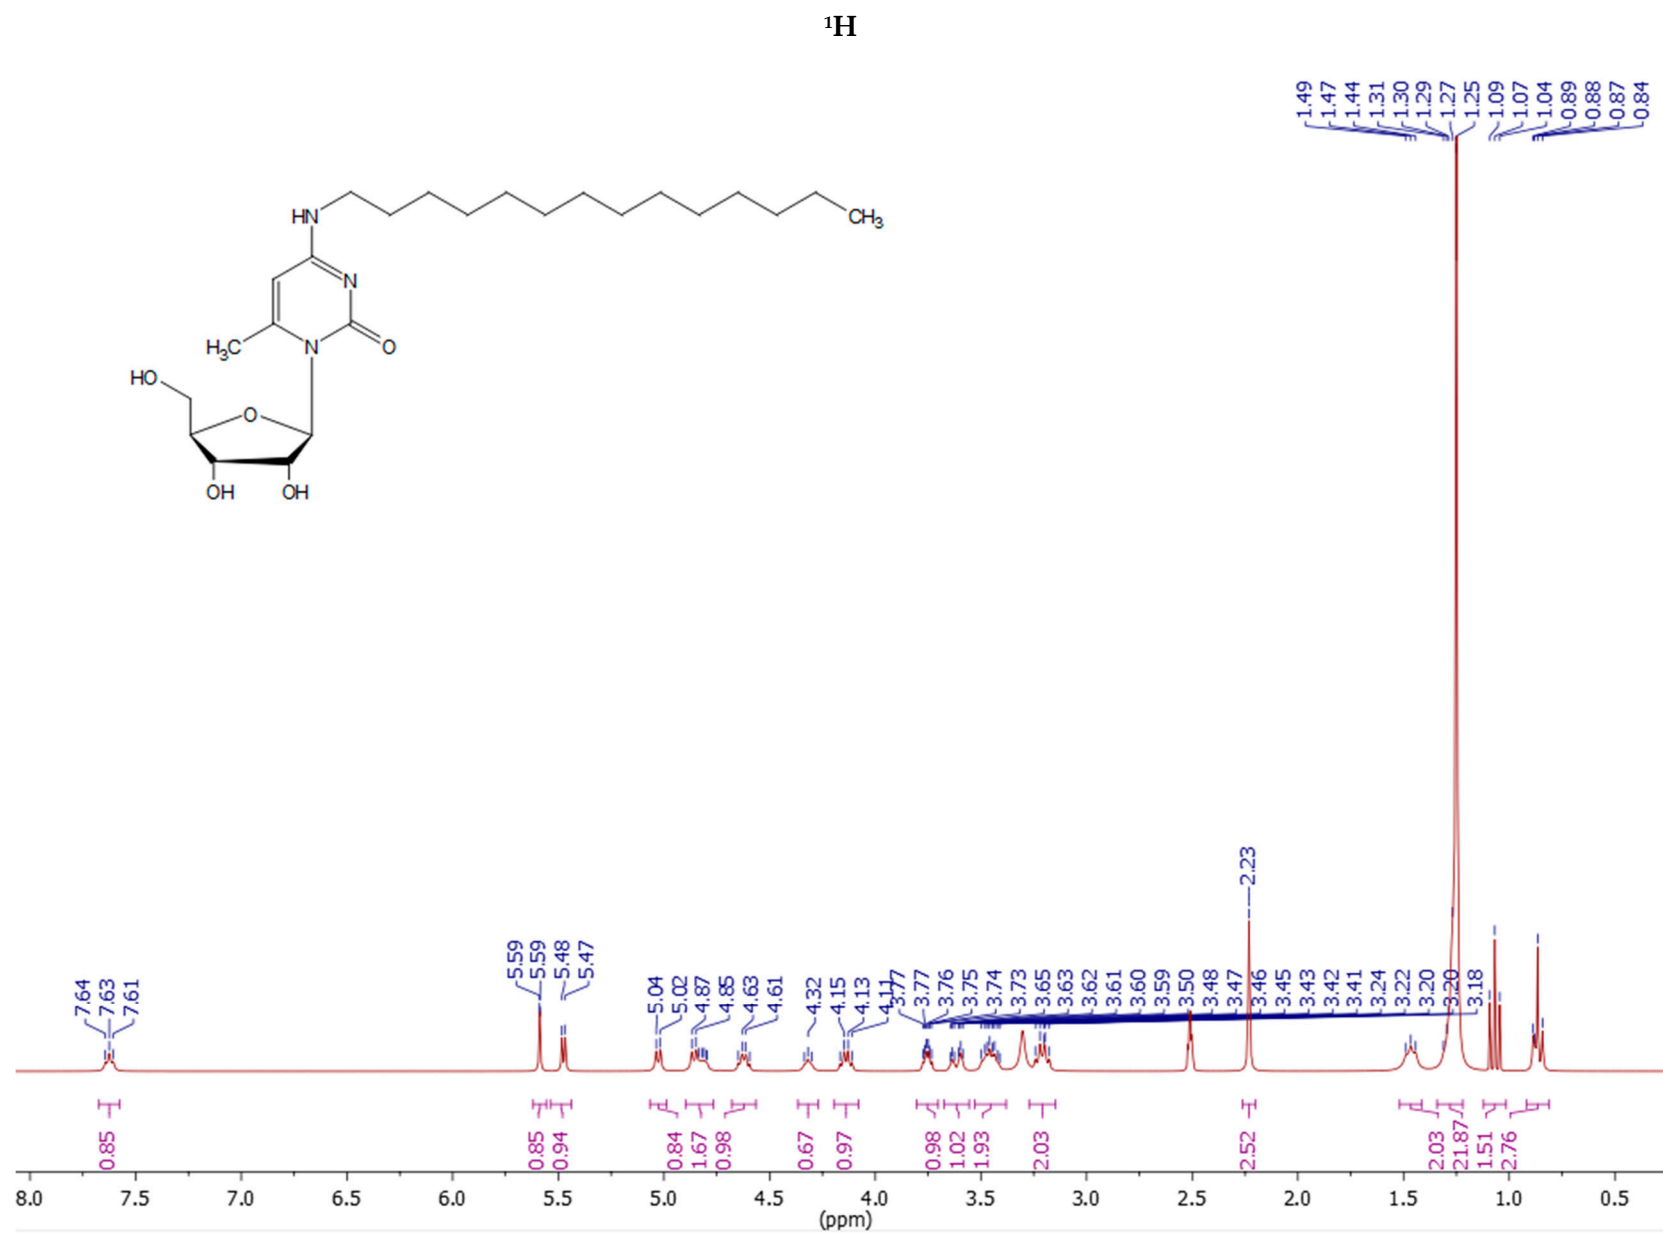

<sup>13</sup>C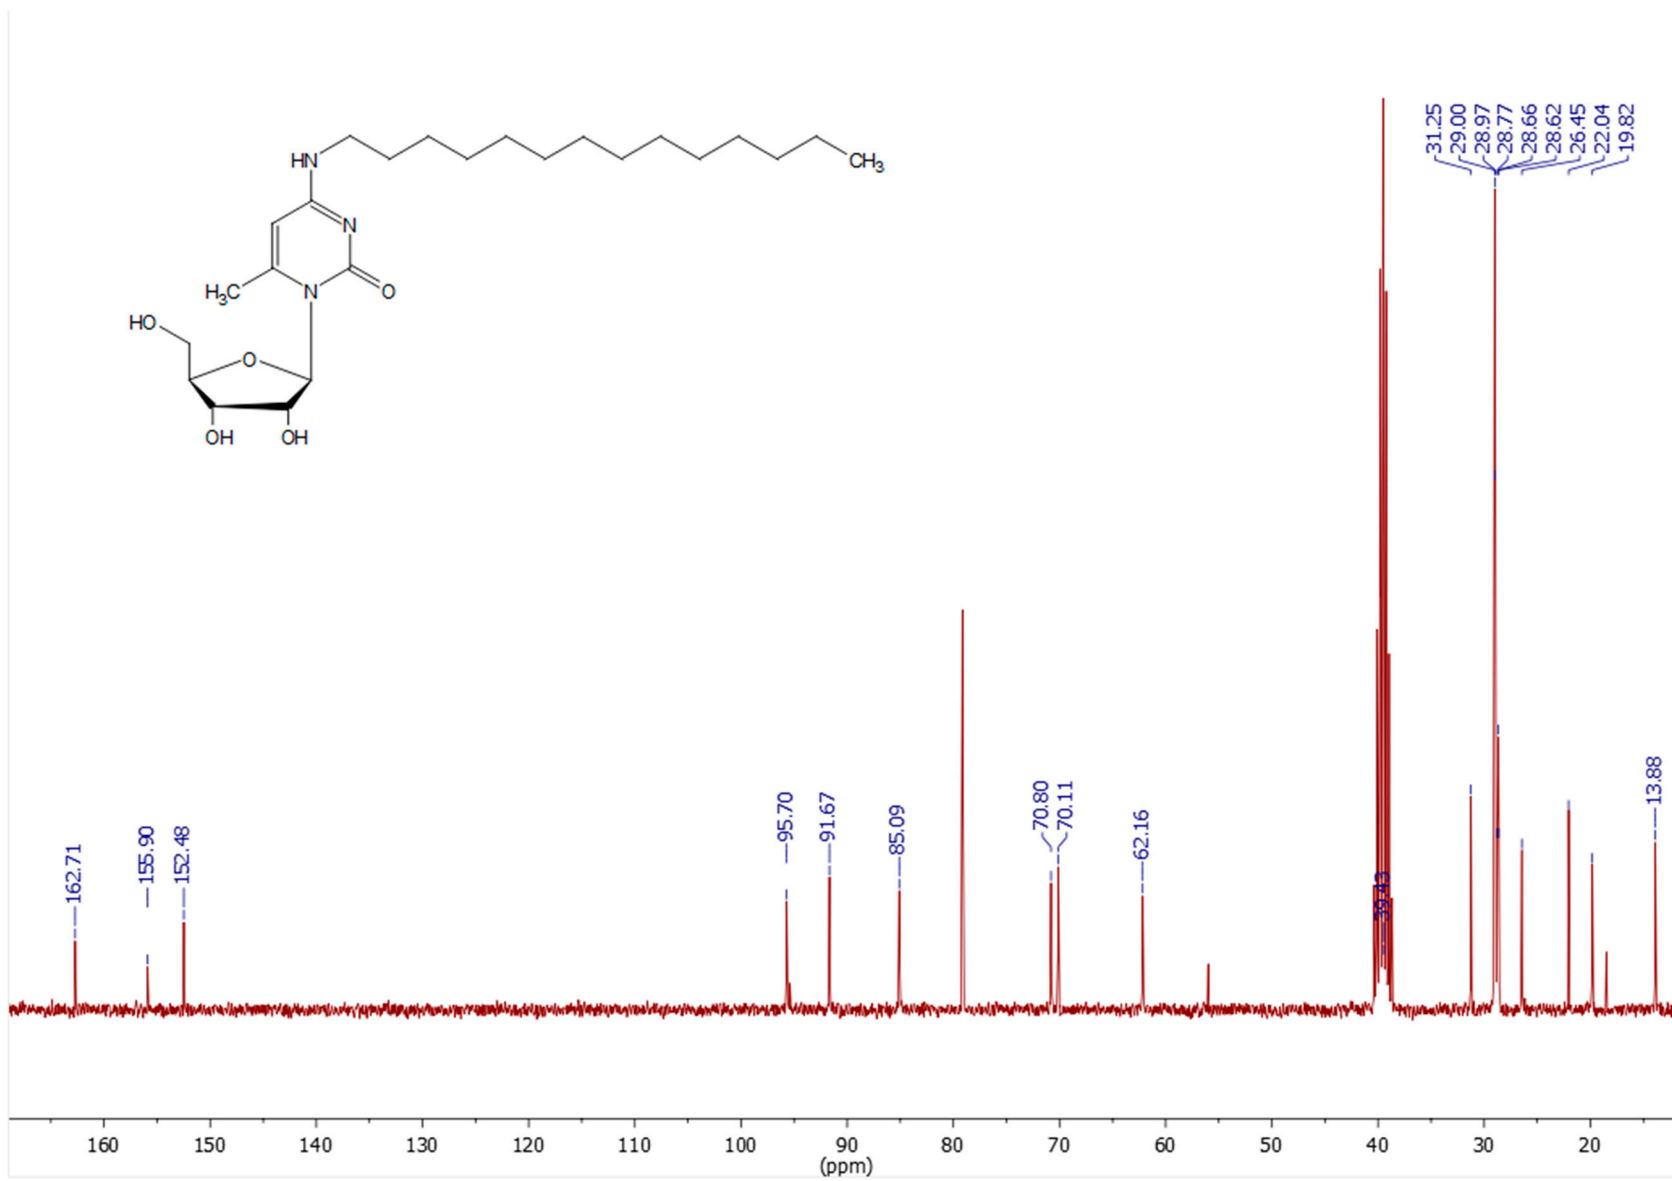

S19

9) 2',3',5'-Tri-*O*-acetyl-6-methyluridine (8)

$^1\text{H}$

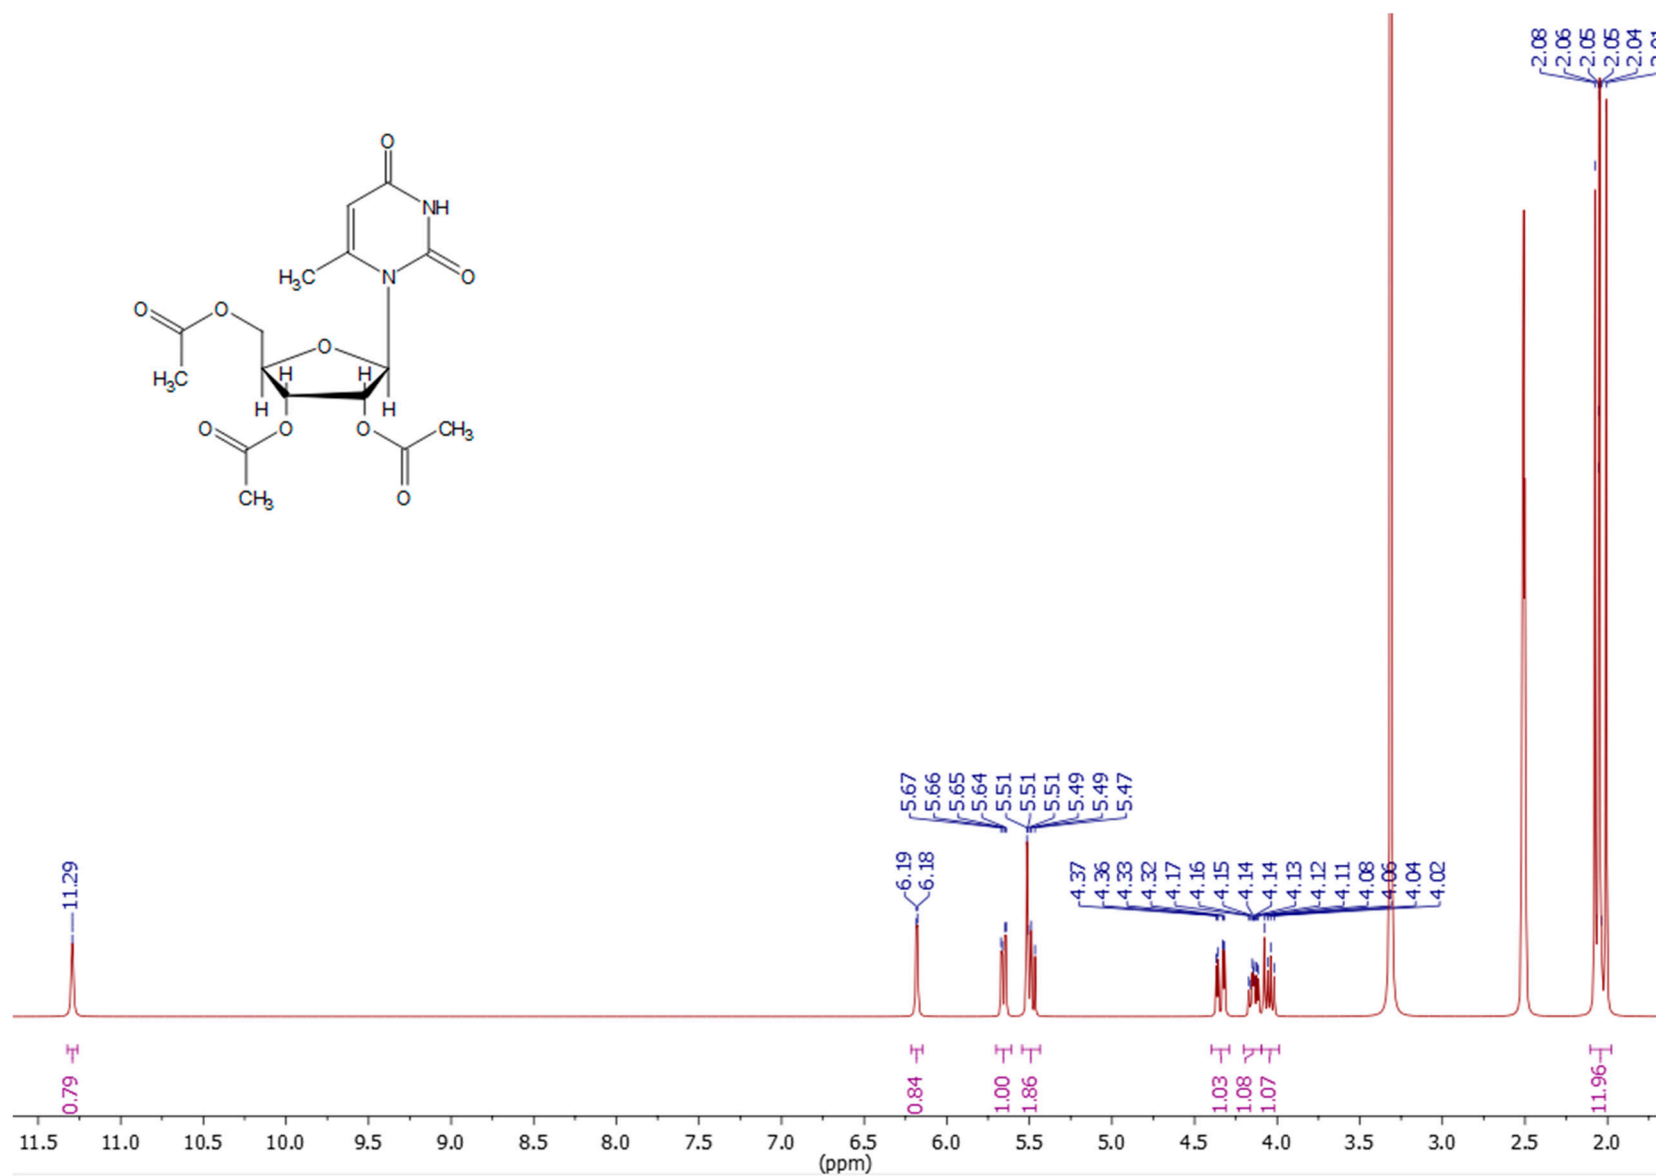



10) 2',3',5'-Tri-*O*-acetyl-6-methyl-4-thiouridine (10)

$^1\text{H}$

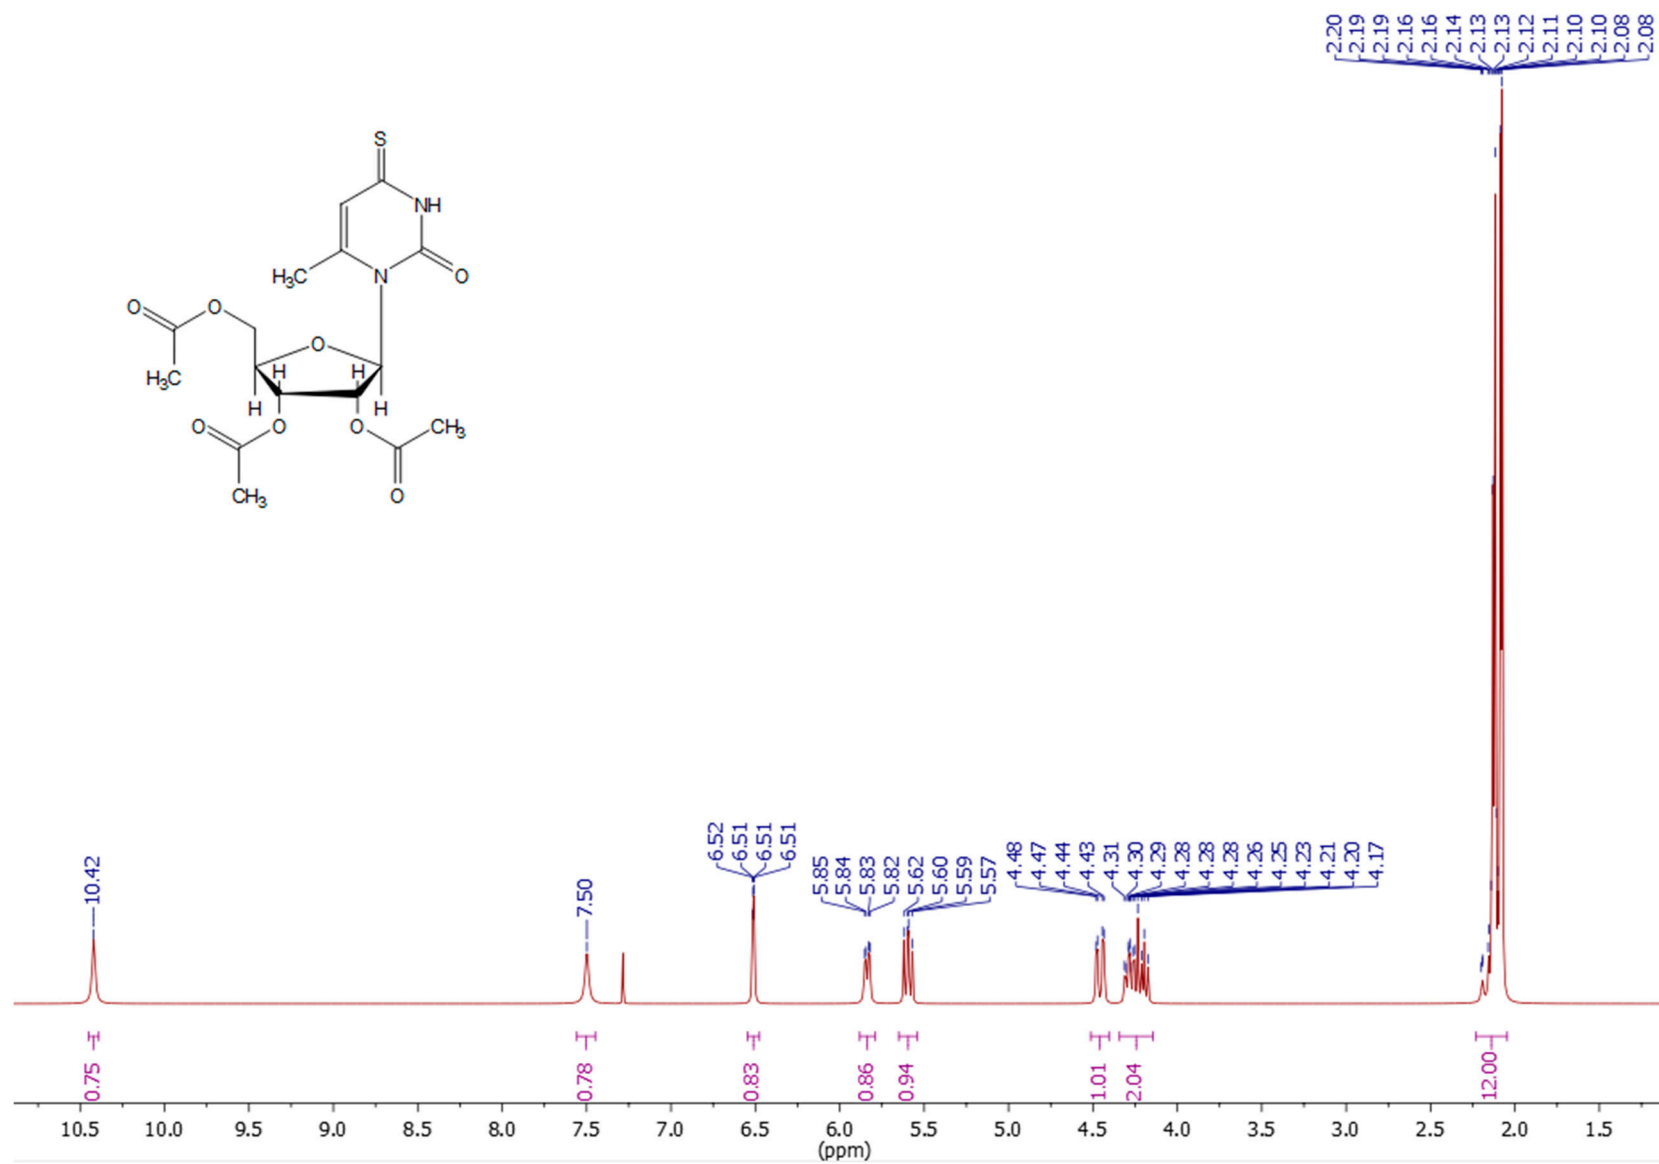

$^{13}\text{C}$

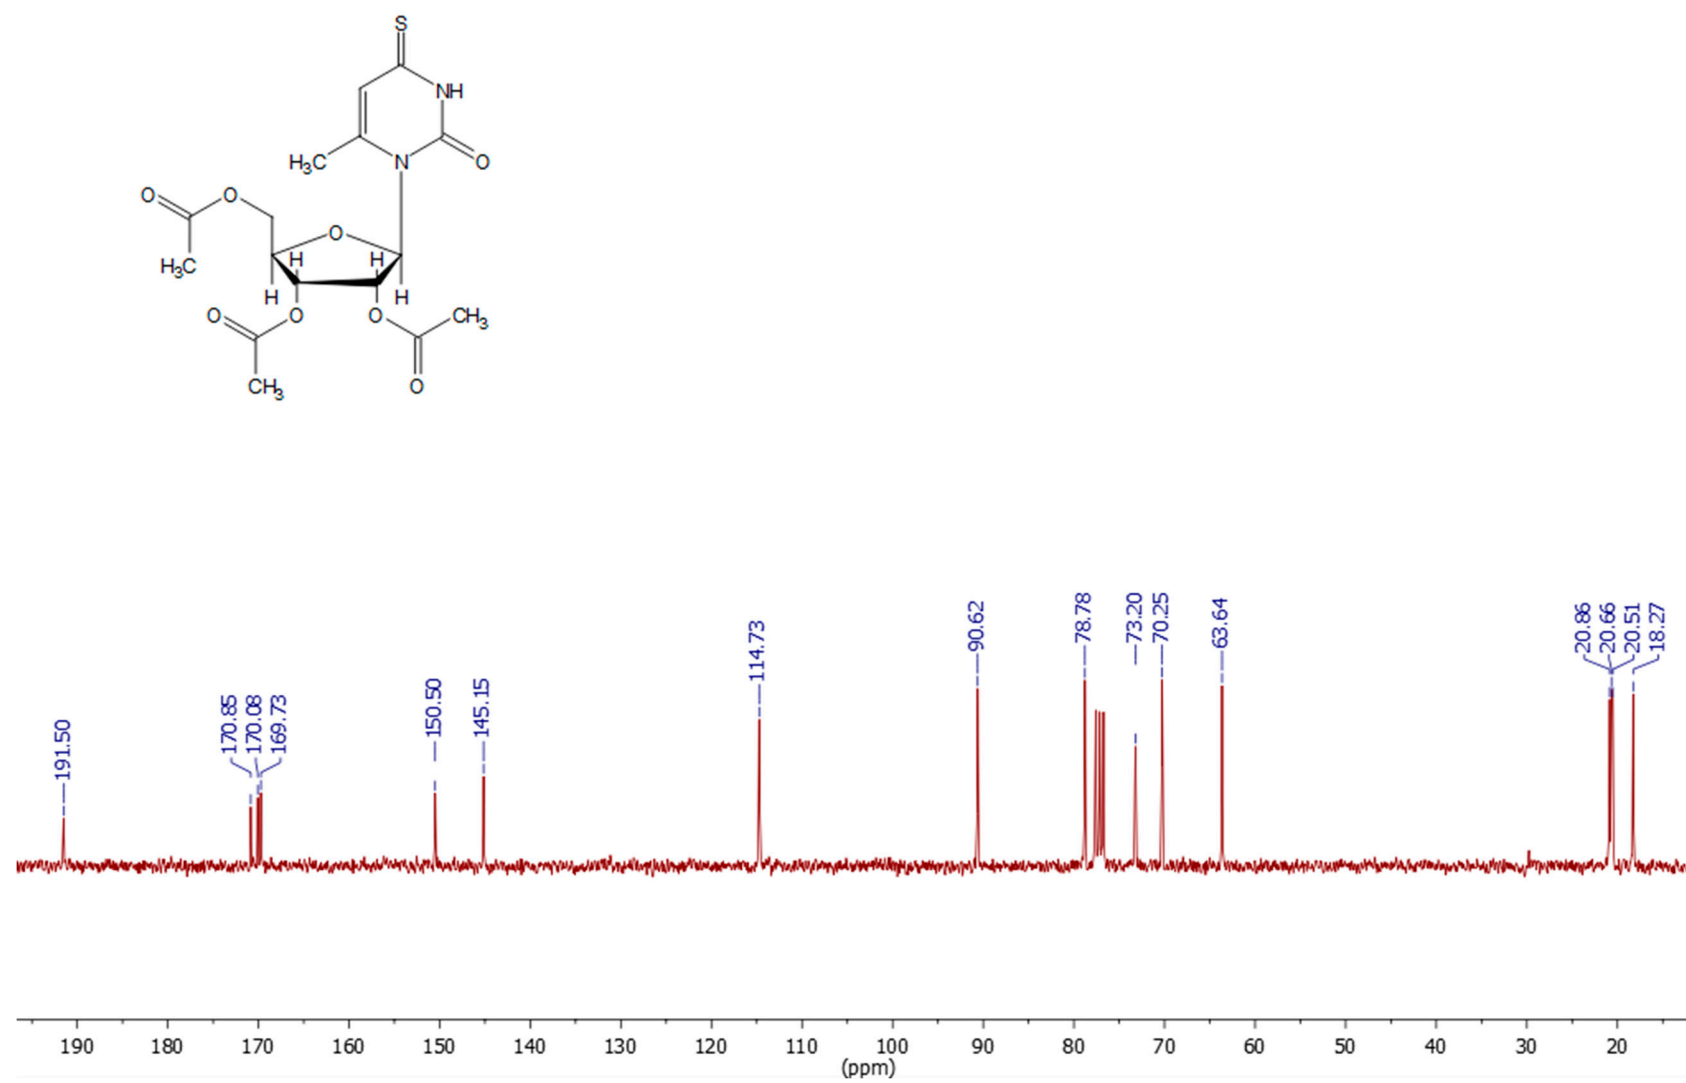

S22

11) 4-Thio-6-methyluracyl (11)

$^1\text{H}$

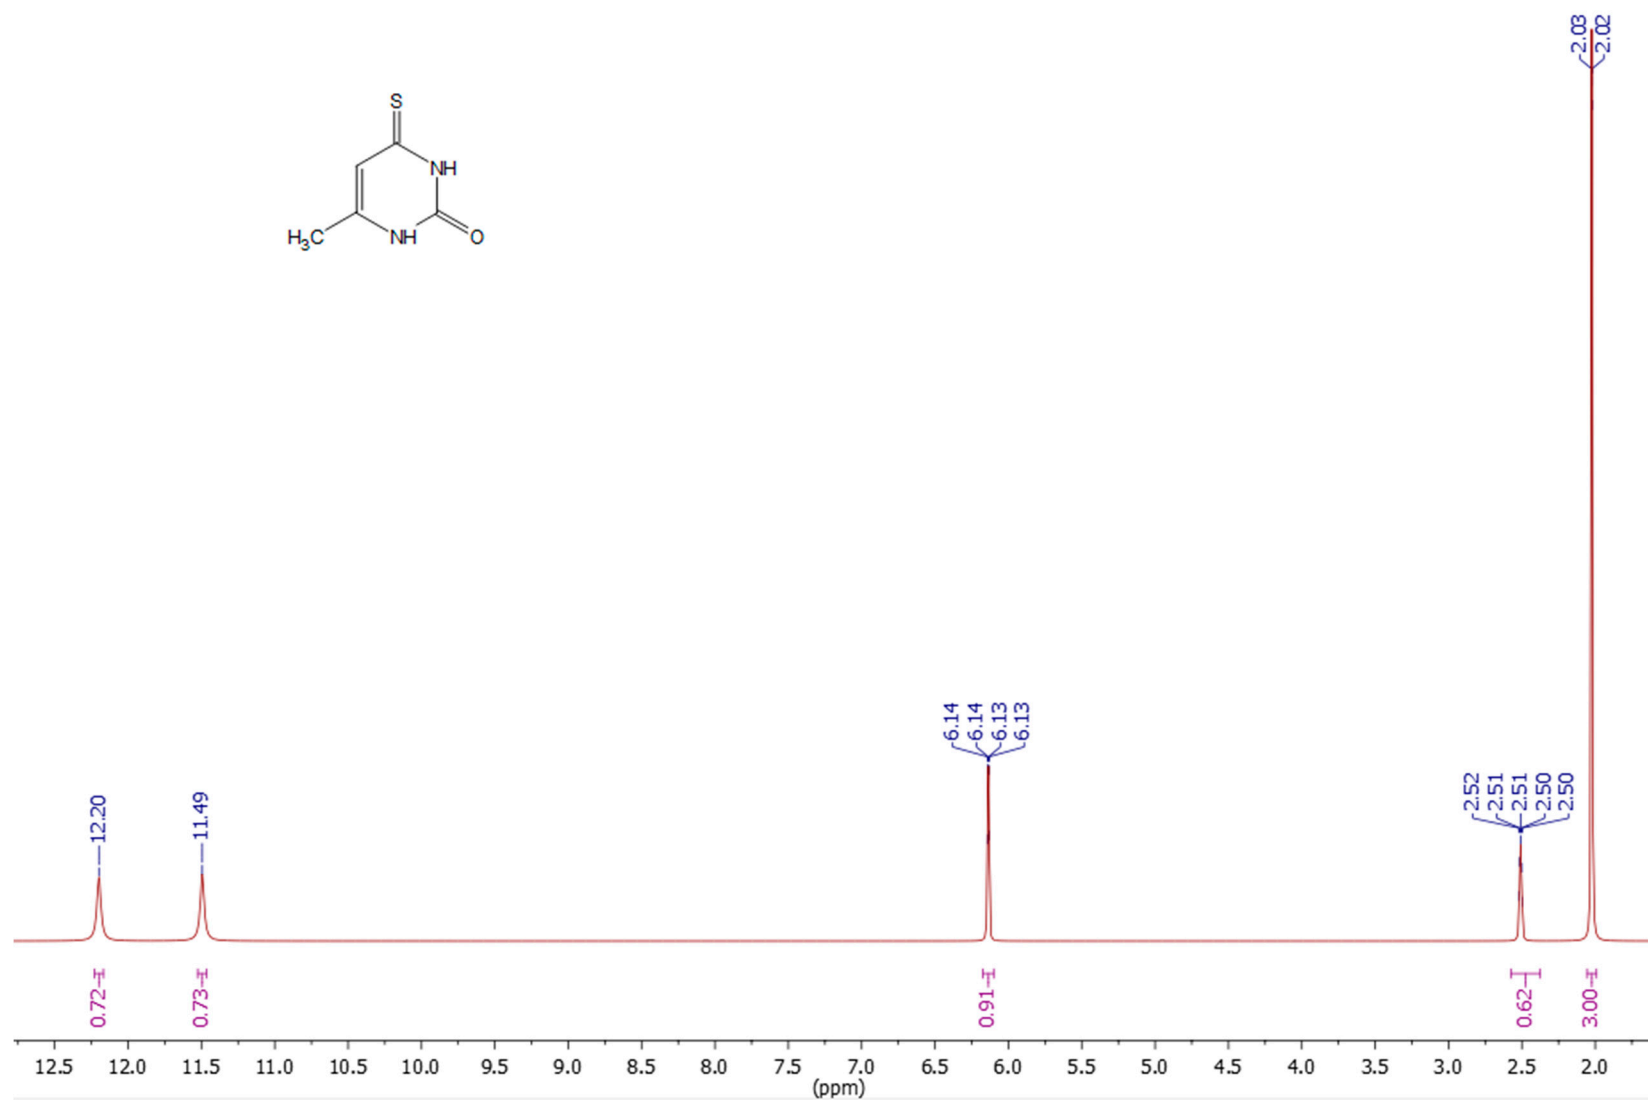

12) *N*<sup>4</sup>-Decyl-6-methylcytosine (12a)

<sup>1</sup>H

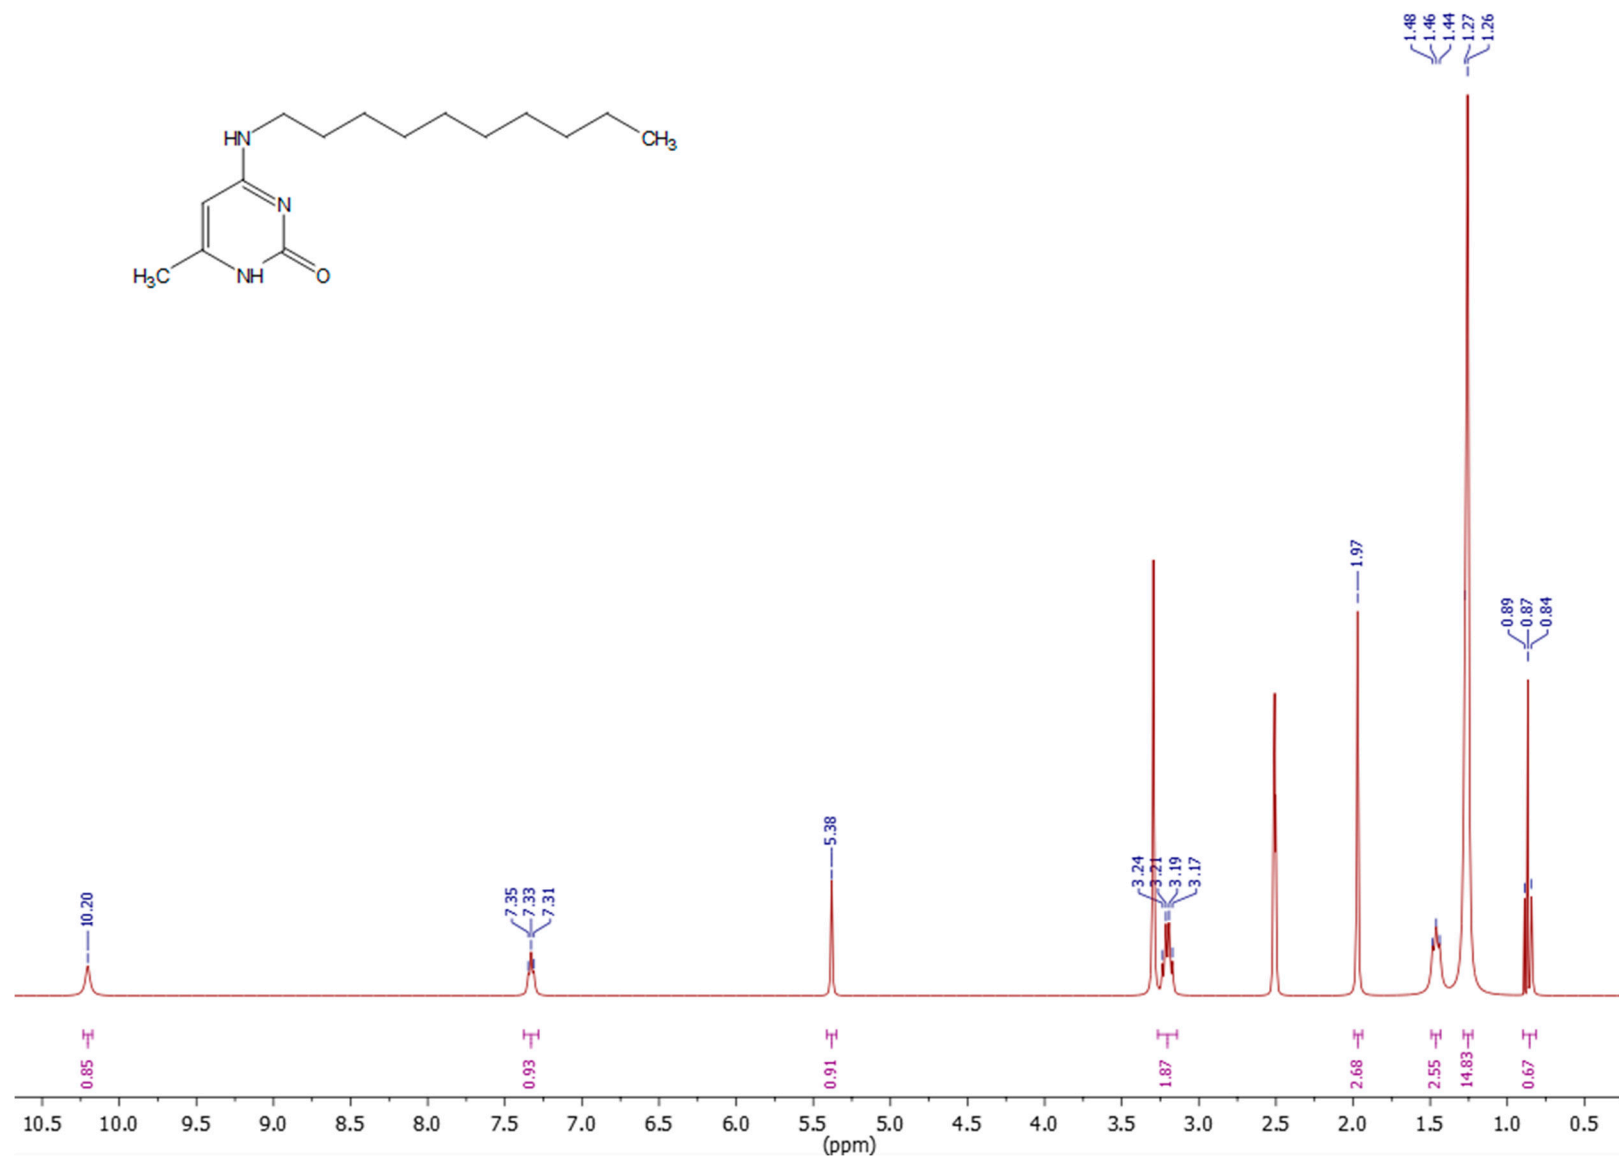

13) *N*<sup>4</sup>-Dodecyl-6-methylcytosine (12b)

<sup>1</sup>H

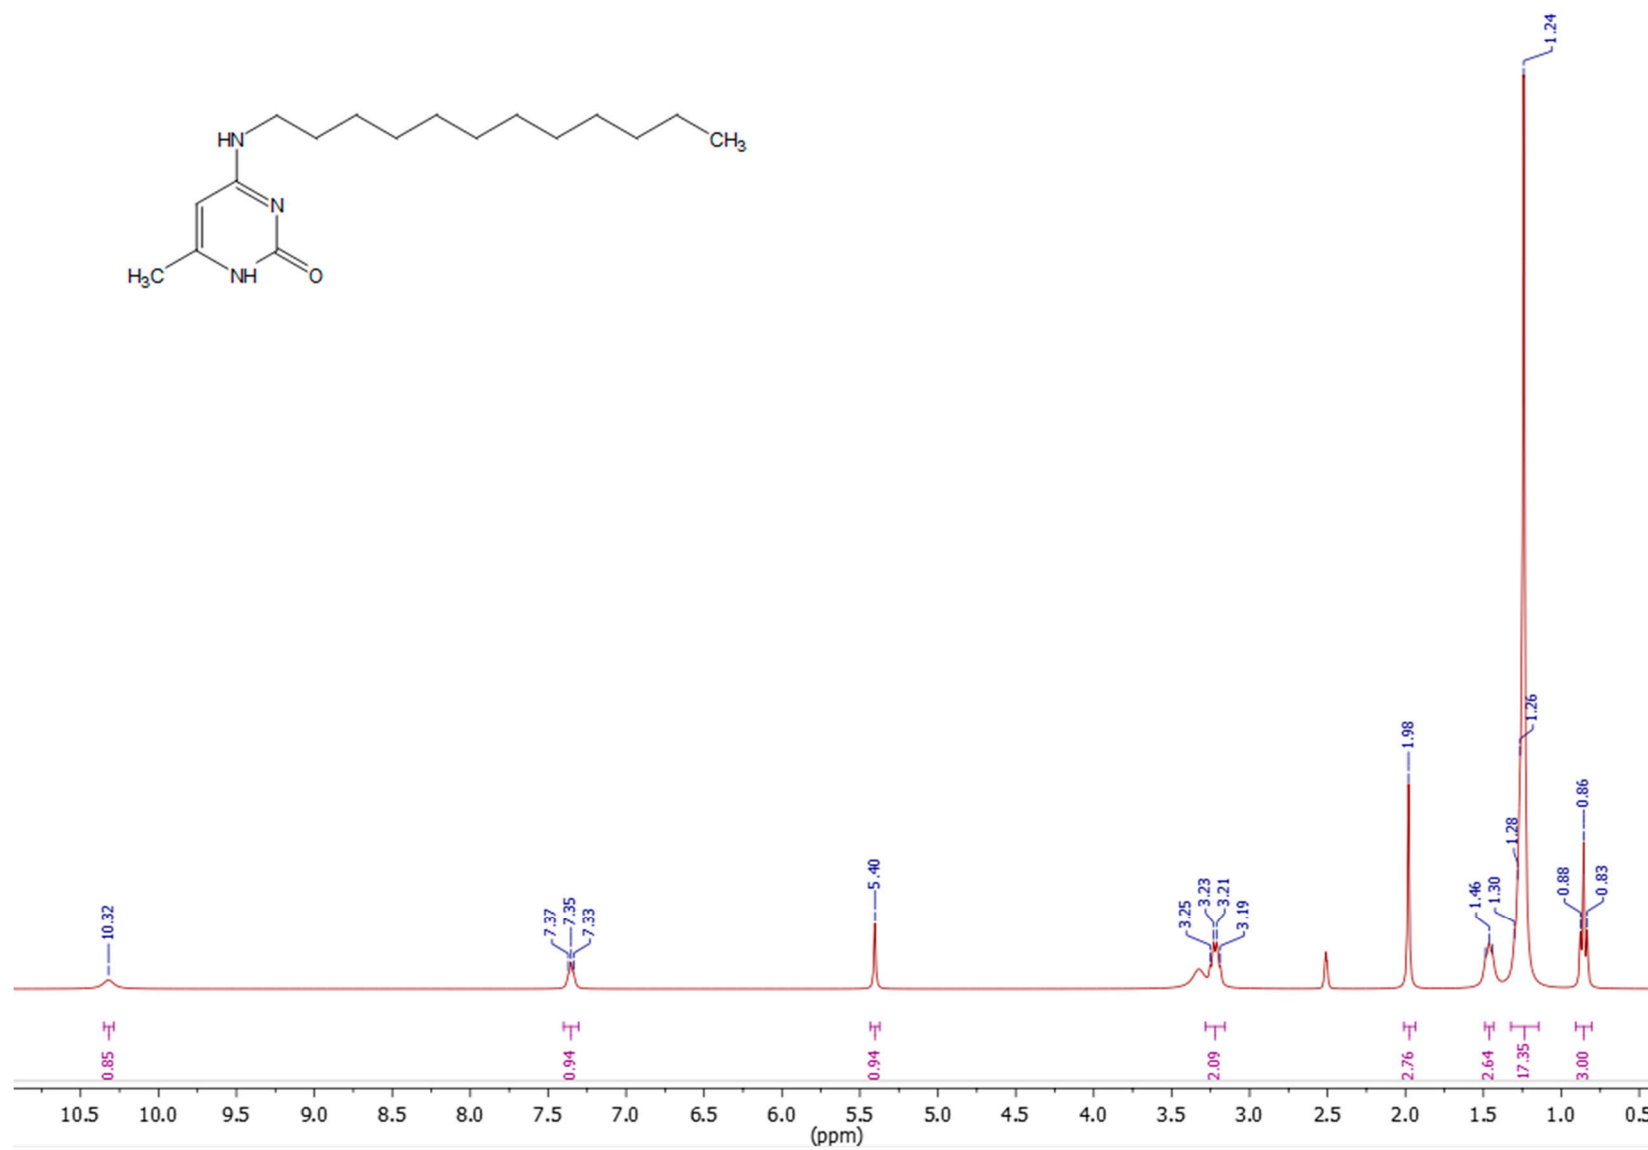

14) *N*<sup>4</sup>-Tetradecyl-6-methylcytosine (12c)

<sup>1</sup>H

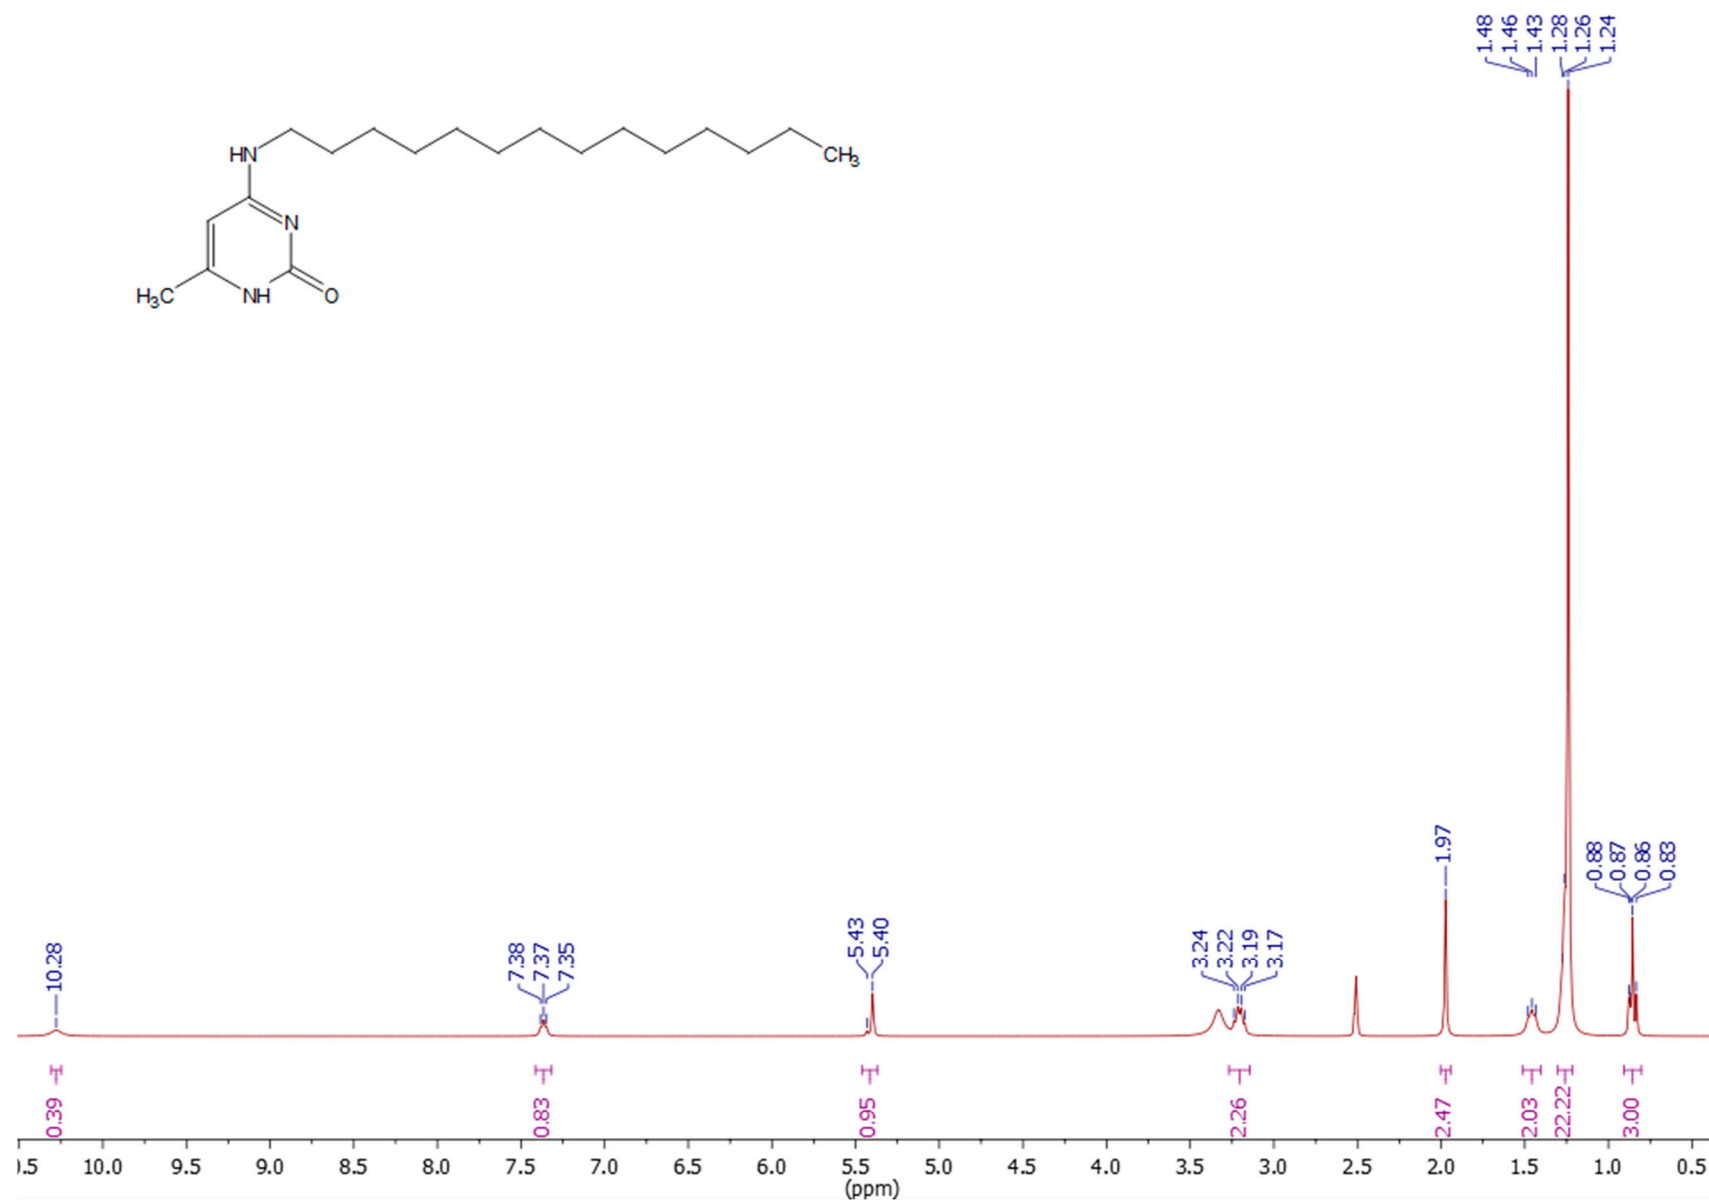

15) 2',3',5'-Tri-*O*-acetyl-*N*<sup>4</sup>-decyl-6-methylcytidine (13a)

<sup>1</sup>H

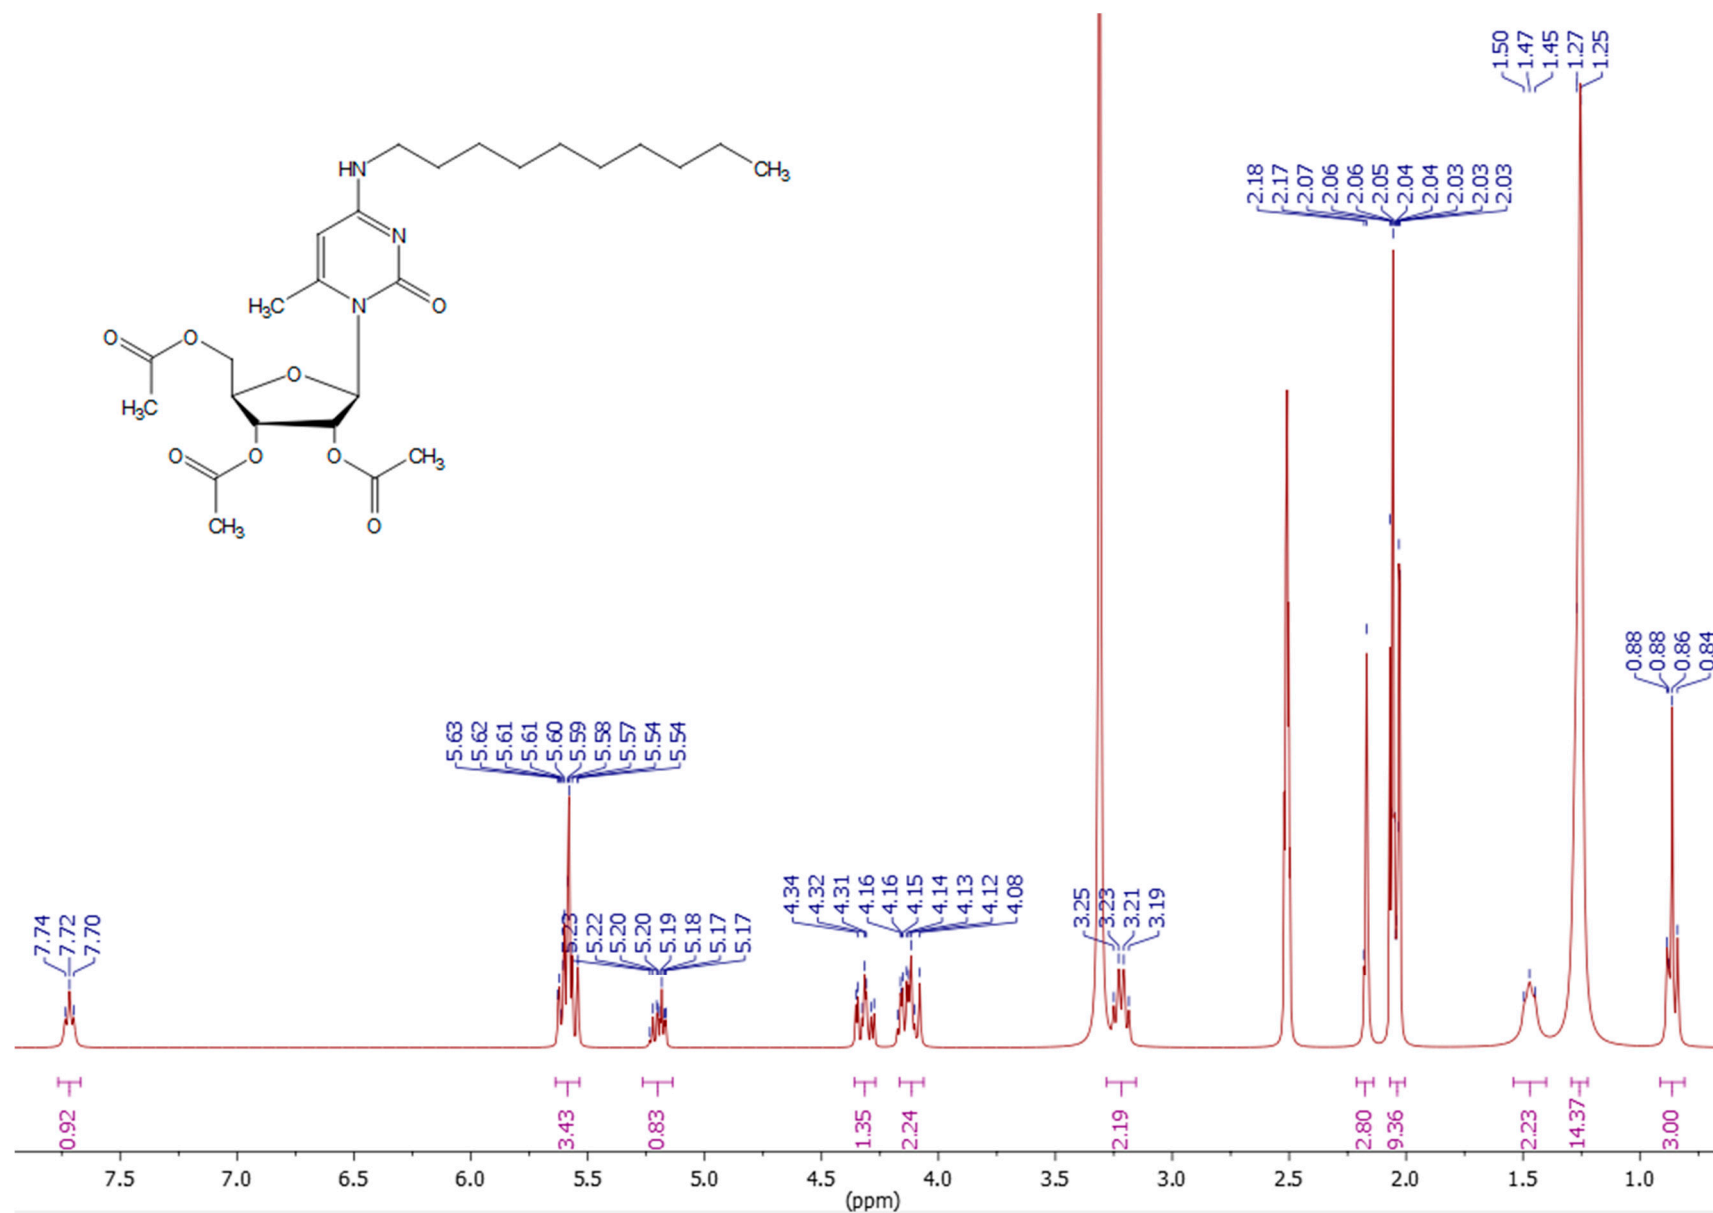

S27

16) 2',3',5'-Tri-*O*-acetyl-*N*<sup>4</sup>-dodecyl-6-methylcytidine (13b)

<sup>1</sup>H

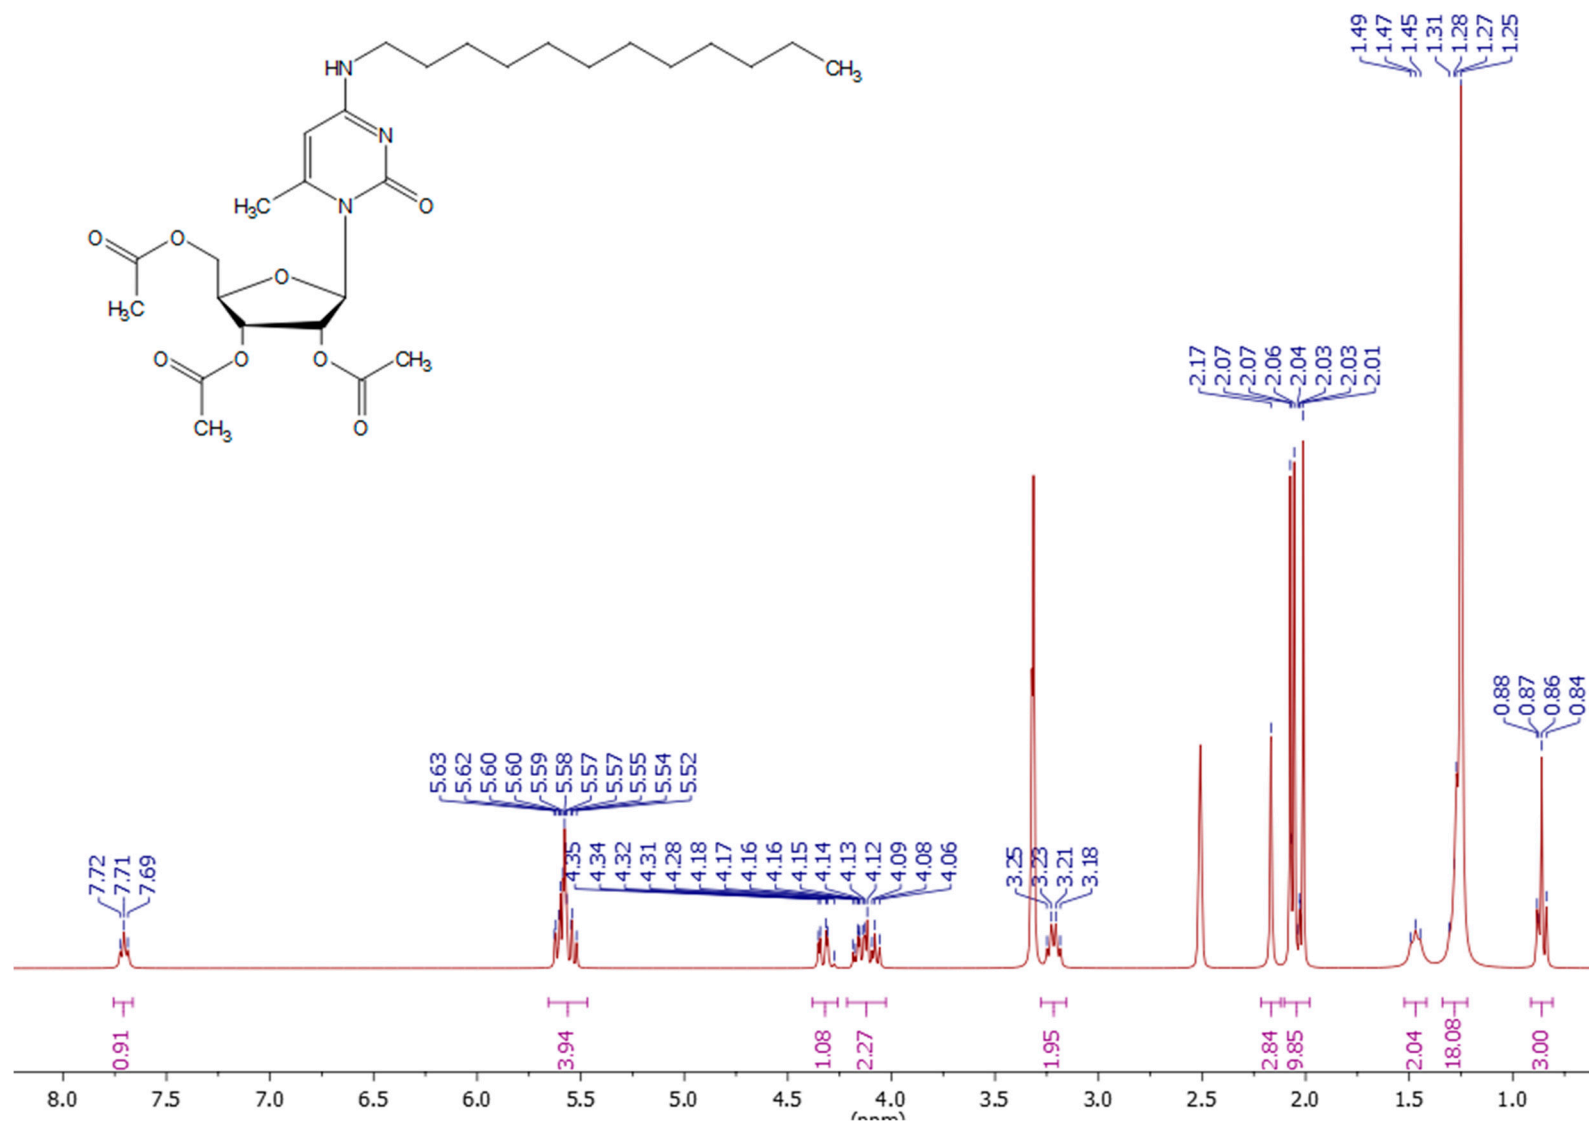



17) 2',3',5'-Tri-*O*-acetyl-*N*<sup>4</sup>-tetradecyl-6-methylcytidine (13c)

<sup>1</sup>H

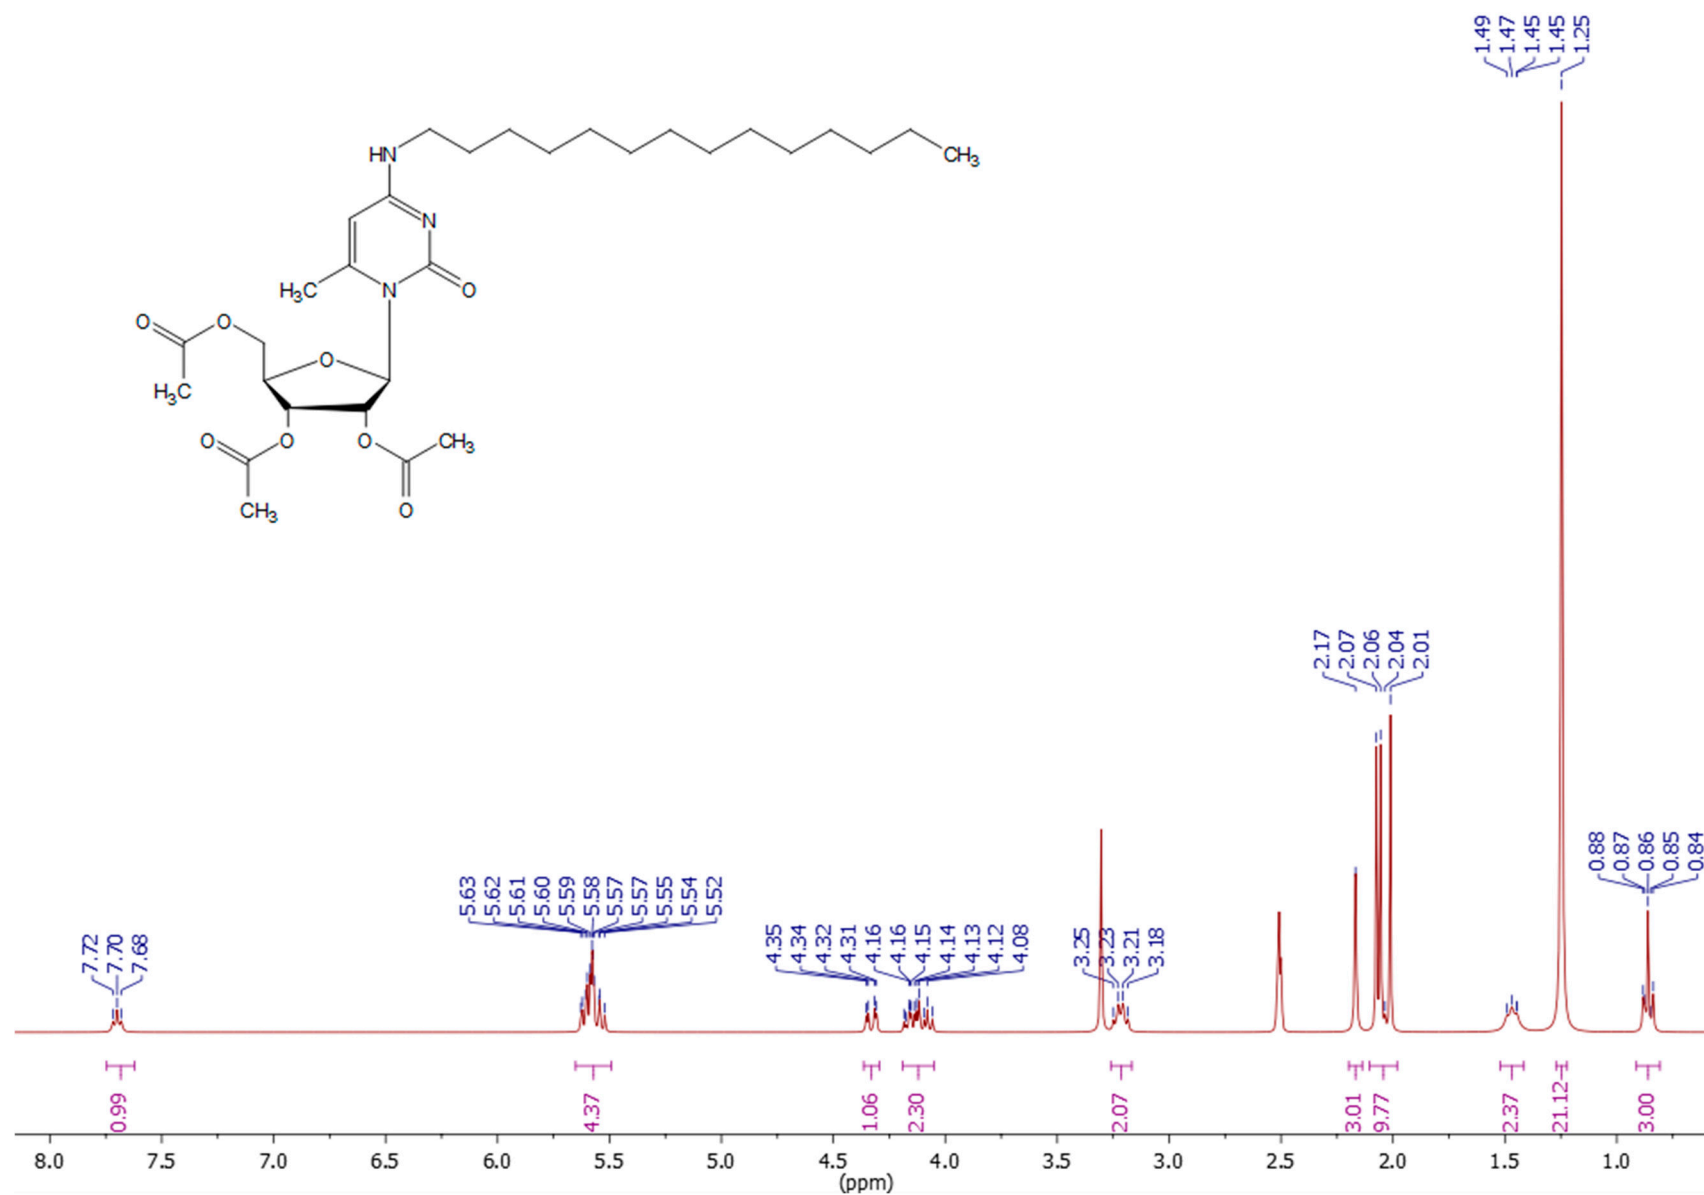

Figure S3. Mass spectra of new compounds

1) *N*<sup>4</sup>-decyl-5-methylcytidine (2a)

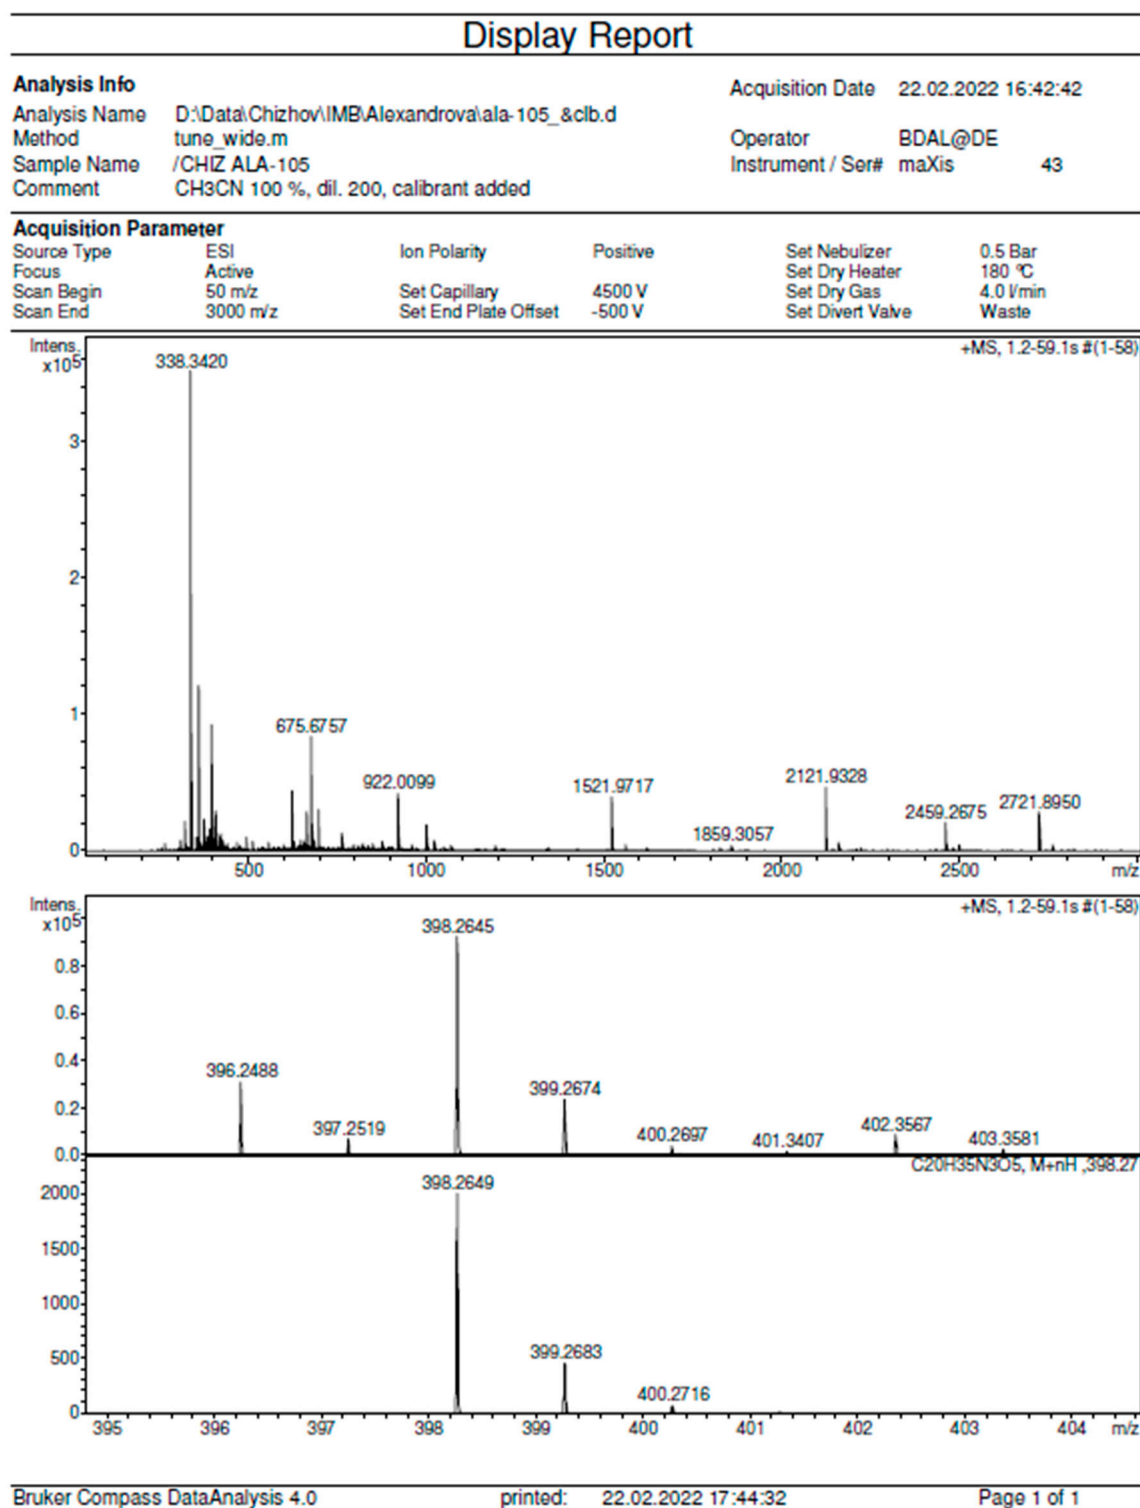

## 2) *N*<sup>4</sup>-dodecyl-5-methylcytidine (2b)

### Display Report

#### Analysis Info

Analysis Name D:\Data\Chizhov\IMB\Alexandrova\ala-106\_&clb.d  
 Method tune\_wide.m  
 Sample Name /CHIZ ALA-106  
 Comment CH3CN : H2O 50/50 %, dil. 400, calibrant added

Acquisition Date 22.02.2022 16:52:26

Operator BDAL@DE

Instrument / Ser# maXis 43

#### Acquisition Parameter

|             |          |                      |          |                  |           |
|-------------|----------|----------------------|----------|------------------|-----------|
| Source Type | ESI      | Ion Polarity         | Positive | Set Nebulizer    | 0.5 Bar   |
| Focus       | Active   |                      |          | Set Dry Heater   | 180 °C    |
| Scan Begin  | 50 m/z   | Set Capillary        | 4500 V   | Set Dry Gas      | 4.0 l/min |
| Scan End    | 3000 m/z | Set End Plate Offset | -500 V   | Set Divert Valve | Waste     |

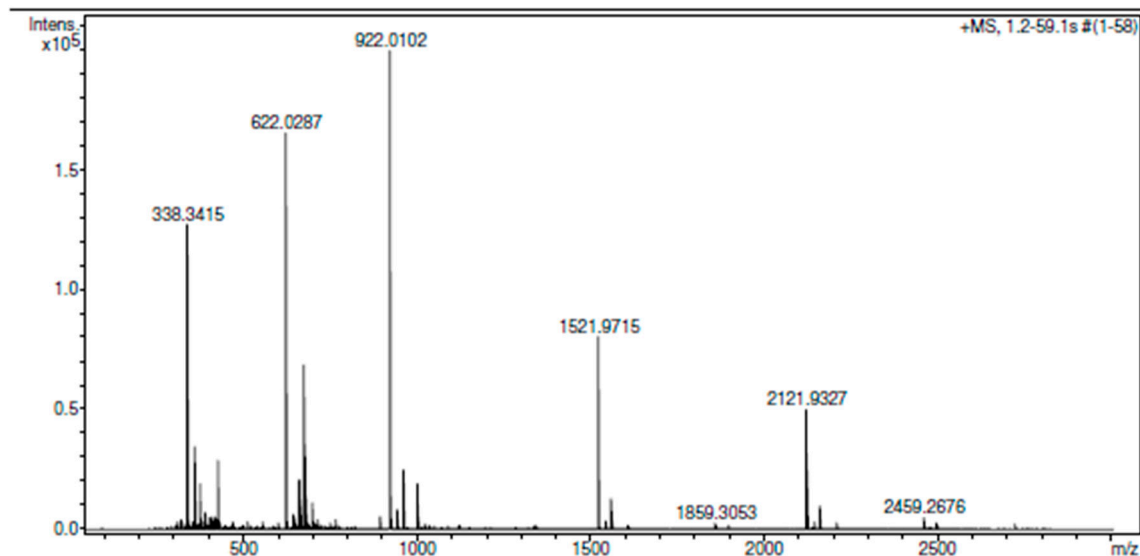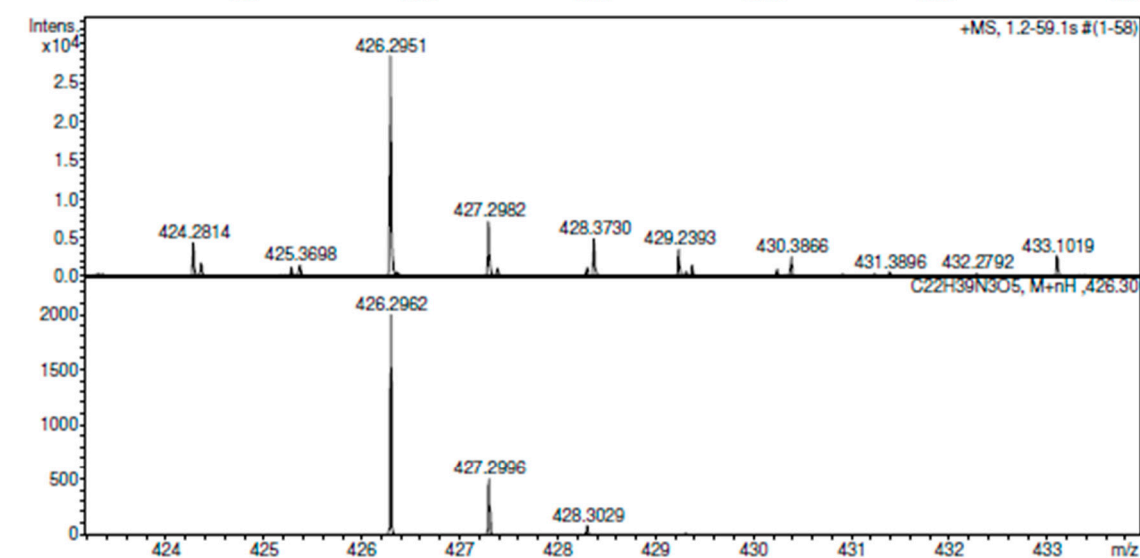

### 3) *N*<sup>4</sup>-tetradecyl-5-methylcytidine (2c)

## Display Report

### Analysis Info

Analysis Name D:\Data\Chizhov\IMB\Alexandrova\ala-107\_&clb.d  
 Method tune\_wide.m  
 Sample Name /CHIZ ALA-107  
 Comment CH3CN : H2O 50/50 %, dil. 400, calibrant added

Acquisition Date 22.02.2022 17:00:46

Operator BDAL@DE  
 Instrument / Ser# maXis 43

### Acquisition Parameter

|             |          |                      |          |                  |           |
|-------------|----------|----------------------|----------|------------------|-----------|
| Source Type | ESI      | Ion Polarity         | Positive | Set Nebulizer    | 0.5 Bar   |
| Focus       | Active   |                      |          | Set Dry Heater   | 180 °C    |
| Scan Begin  | 50 m/z   | Set Capillary        | 4500 V   | Set Dry Gas      | 4.0 l/min |
| Scan End    | 3000 m/z | Set End Plate Offset | -500 V   | Set Divert Valve | Waste     |

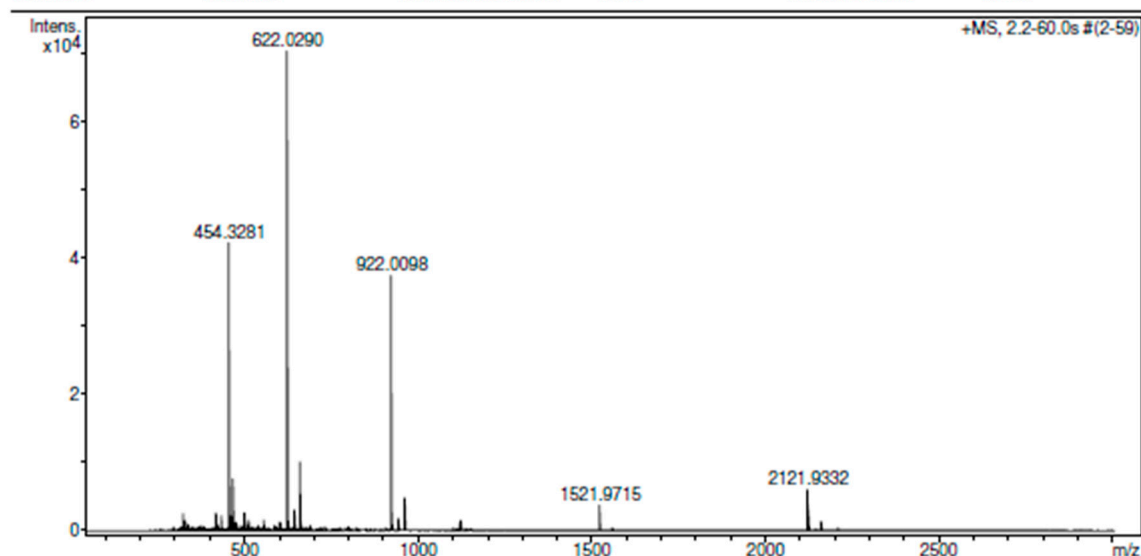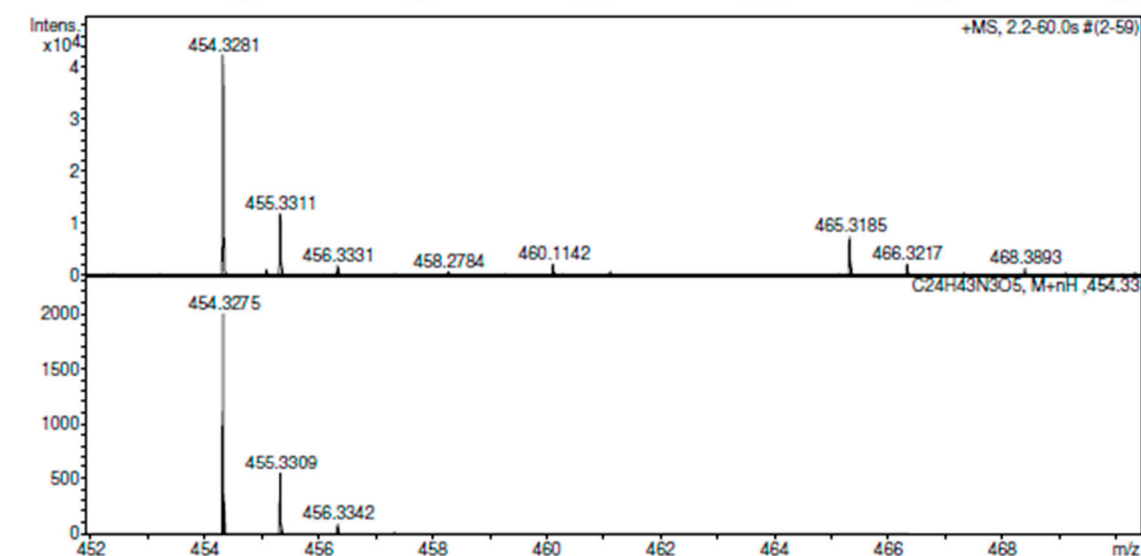

# 4) N<sup>4</sup>-dodecylcytidine (2d)

## Display Report

### Analysis Info

Analysis Name D:\Data\Chizhov\IMB\Alexandrova\ala-103\_&clb.d  
 Method tune\_wide.m  
 Sample Name /CHIZ ALA-103  
 Comment CH<sub>3</sub>CN 100 %, dil. 200, calibrant added

Acquisition Date 22.02.2022 15:05:27

Operator BDAL@DE  
 Instrument / Ser# maXis 43

### Acquisition Parameter

|             |          |                      |          |                  |           |
|-------------|----------|----------------------|----------|------------------|-----------|
| Source Type | ESI      | Ion Polarity         | Positive | Set Nebulizer    | 0.5 Bar   |
| Focus       | Active   |                      |          | Set Dry Heater   | 180 °C    |
| Scan Begin  | 50 m/z   | Set Capillary        | 4500 V   | Set Dry Gas      | 4.0 l/min |
| Scan End    | 3000 m/z | Set End Plate Offset | -500 V   | Set Divert Valve | Waste     |

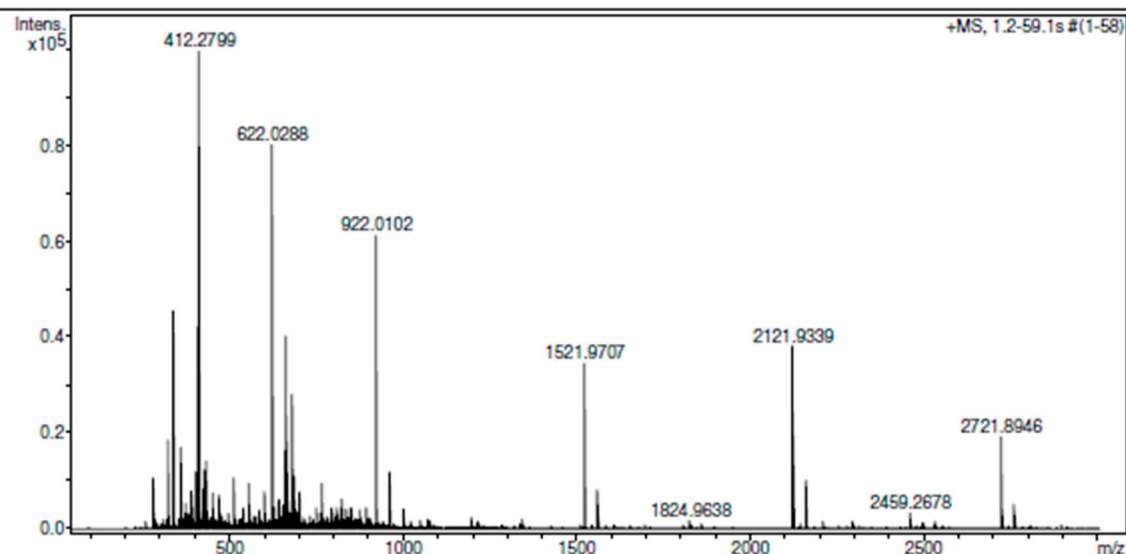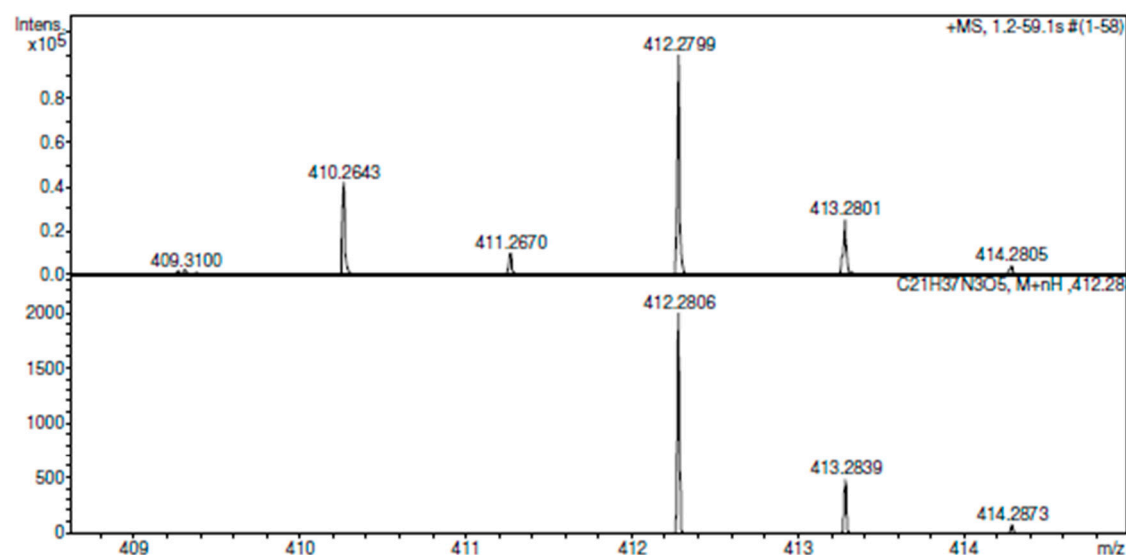

# 5) *N*<sup>4</sup>-tetradecylcytidine (2e)

## Display Report

### Analysis Info

Analysis Name D:\Data\Chizhov\IMB\Alexandrova\ala-104\_&clb.d  
 Method tune\_wide.m  
 Sample Name /CHIZ ALA-104  
 Comment CH3CN 100 %, dil. 2000, calibrant added

Acquisition Date 22.02.2022 15:12:37

Operator BDAL@DE

Instrument / Ser# maXis 43

### Acquisition Parameter

|             |          |                      |          |                  |           |
|-------------|----------|----------------------|----------|------------------|-----------|
| Source Type | ESI      | Ion Polarity         | Positive | Set Nebulizer    | 0.5 Bar   |
| Focus       | Active   |                      |          | Set Dry Heater   | 180 °C    |
| Scan Begin  | 50 m/z   | Set Capillary        | 4500 V   | Set Dry Gas      | 4.0 l/min |
| Scan End    | 3000 m/z | Set End Plate Offset | -500 V   | Set Divert Valve | Waste     |

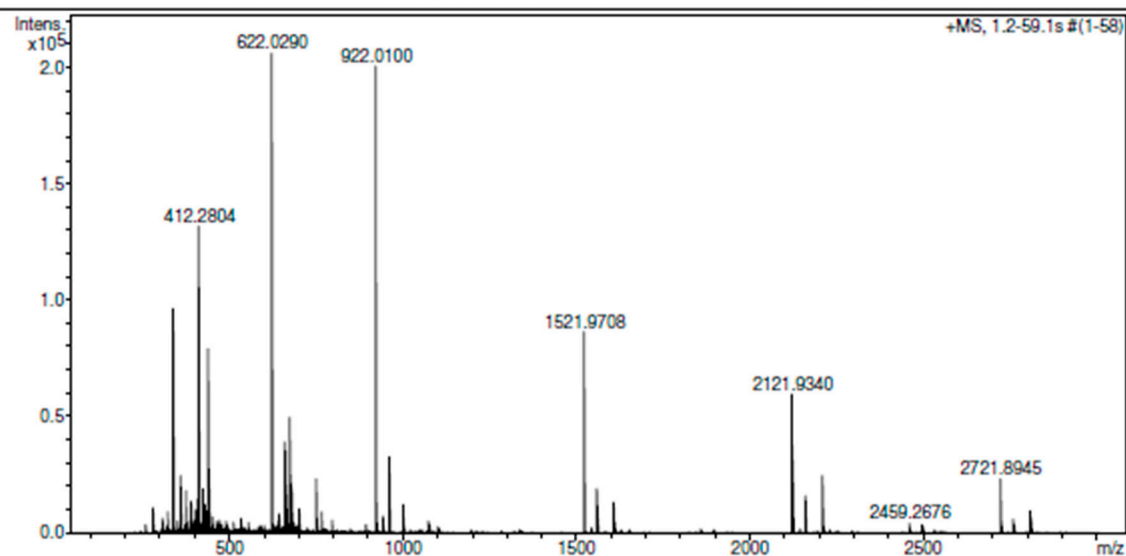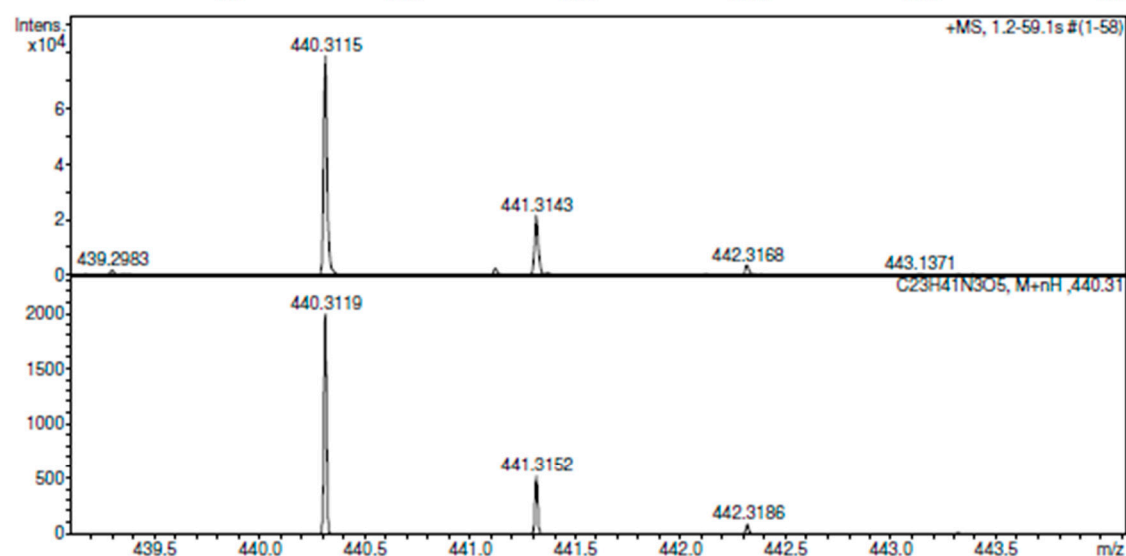

6) N<sup>4</sup>-Decyl-6-methylcytidine (3a)

## Display Report

## Analysis Info

Analysis Name D:\Data\Chizhov\IMB\Aleksandrova\Oskol'ski\osk-1\_clblow.d  
 Method tune\_low.m  
 Sample Name /CHIZ OSK-1  
 Comment CH3CN:H2O 50/50 %, dil. 20, low conc. calibrant added

Acquisition Date 19.01.2024 17:57:39

Operator BDAL@DE

Instrument / Ser# microTOF 10248

## Acquisition Parameter

|             |            |                      |          |                  |           |
|-------------|------------|----------------------|----------|------------------|-----------|
| Source Type | ESI        | Ion Polarity         | Positive | Set Nebulizer    | 0.4 Bar   |
| Focus       | Not active |                      |          | Set Dry Heater   | 180 °C    |
| Scan Begin  | 50 m/z     | Set Capillary        | 4500 V   | Set Dry Gas      | 4.0 l/min |
| Scan End    | 3000 m/z   | Set End Plate Offset | -500 V   | Set Divert Valve | Waste     |

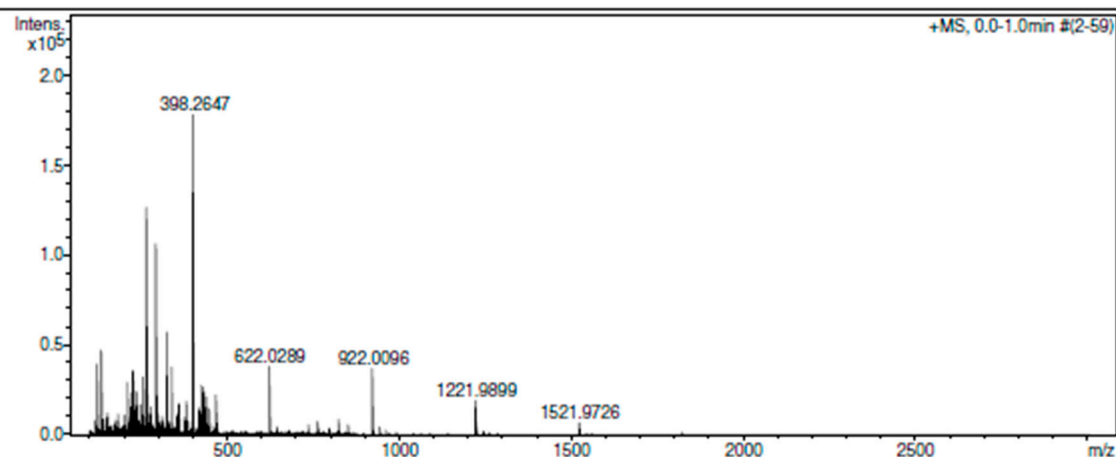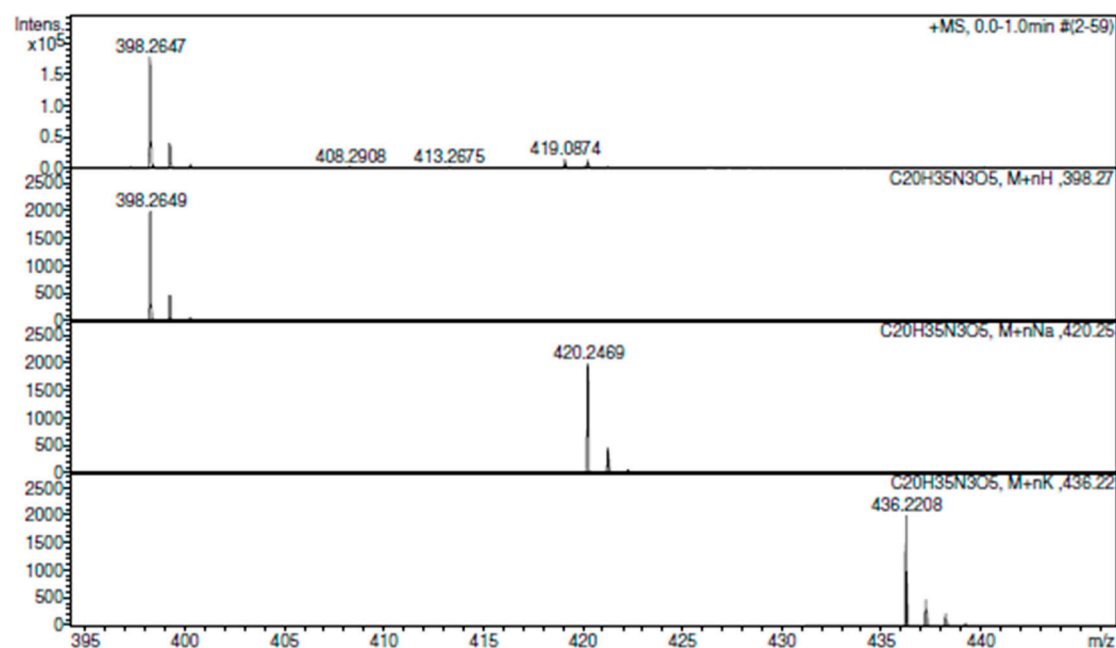

7) N<sup>4</sup>-Dodecyl-6-methylcytidine (3b)

## Display Report

## Analysis Info

Analysis Name D:\Data\Chizhov\IMB\Aleksandrova\Oskol'ski\osk-2\_&clblow.d  
 Method tune\_low.m  
 Sample Name /CHIZ OSK-2  
 Comment CH3CN:H2O 50/50 %, dil. 20, low conc. calibrant added

Acquisition Date 19.01.2024 18:02:22

Operator BDAL@DE

Instrument / Ser# micrOTOF 10248

## Acquisition Parameter

|             |            |                      |          |                  |           |
|-------------|------------|----------------------|----------|------------------|-----------|
| Source Type | ESI        | Ion Polarity         | Positive | Set Nebulizer    | 0.4 Bar   |
| Focus       | Not active |                      |          | Set Dry Heater   | 180 °C    |
| Scan Begin  | 50 m/z     | Set Capillary        | 4500 V   | Set Dry Gas      | 4.0 l/min |
| Scan End    | 3000 m/z   | Set End Plate Offset | -500 V   | Set Divert Valve | Waste     |

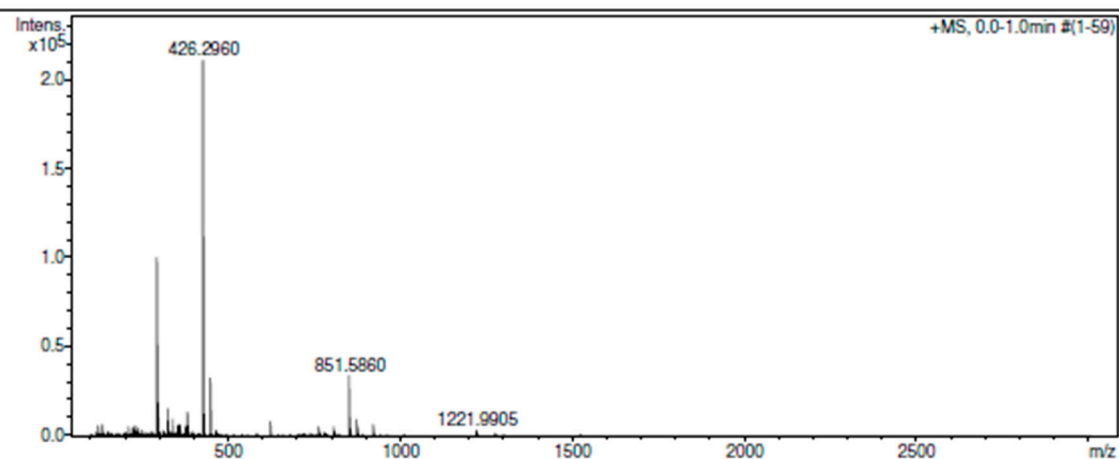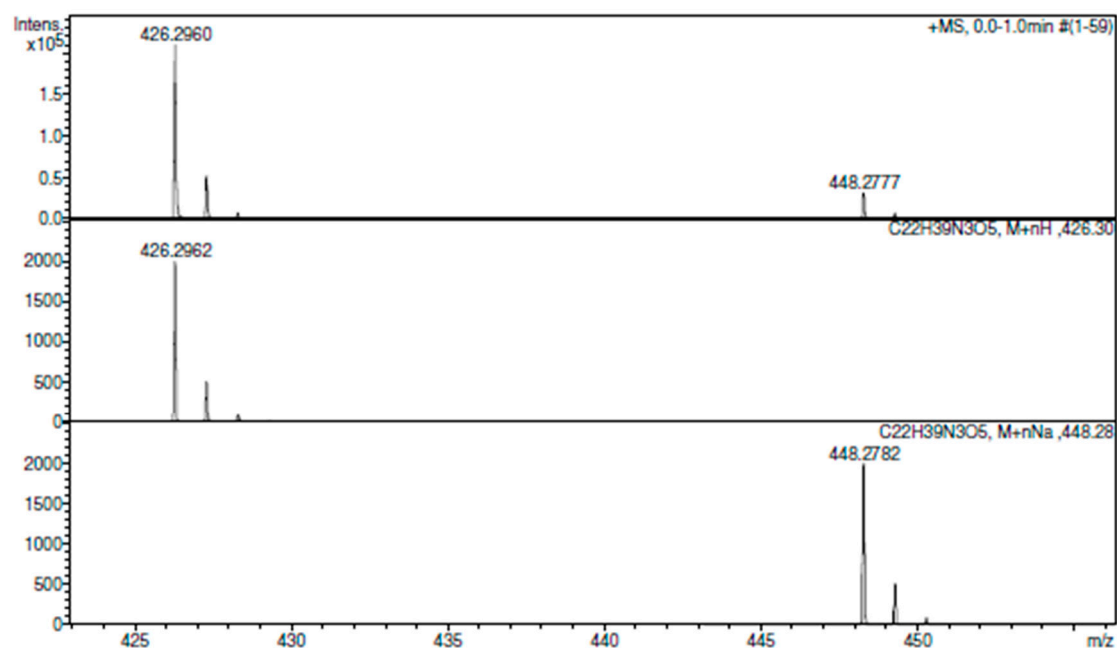



8)  $N^4$ -Tetradecyl-6-methylcytidine (3c)

## Display Report

## Analysis Info

Analysis Name D:\Data\Chizhov\IMB\Aleksandrova\Oskol'ski\osk-3\_cblow.d  
 Method tune\_low.m  
 Sample Name /CHIZ OSK-3  
 Comment CH<sub>3</sub>CN:H<sub>2</sub>O 50/50 %, dil. 200, low conc. calibrant added

Acquisition Date 19.01.2024 18:09:39

Operator BDAL@DE

Instrument / Ser# micrOTOF 10248

## Acquisition Parameter

|             |            |                      |          |                  |           |
|-------------|------------|----------------------|----------|------------------|-----------|
| Source Type | ESI        | Ion Polarity         | Positive | Set Nebulizer    | 0.4 Bar   |
| Focus       | Not active |                      |          | Set Dry Heater   | 180 °C    |
| Scan Begin  | 50 m/z     | Set Capillary        | 4500 V   | Set Dry Gas      | 4.0 l/min |
| Scan End    | 3000 m/z   | Set End Plate Offset | -500 V   | Set Divert Valve | Waste     |

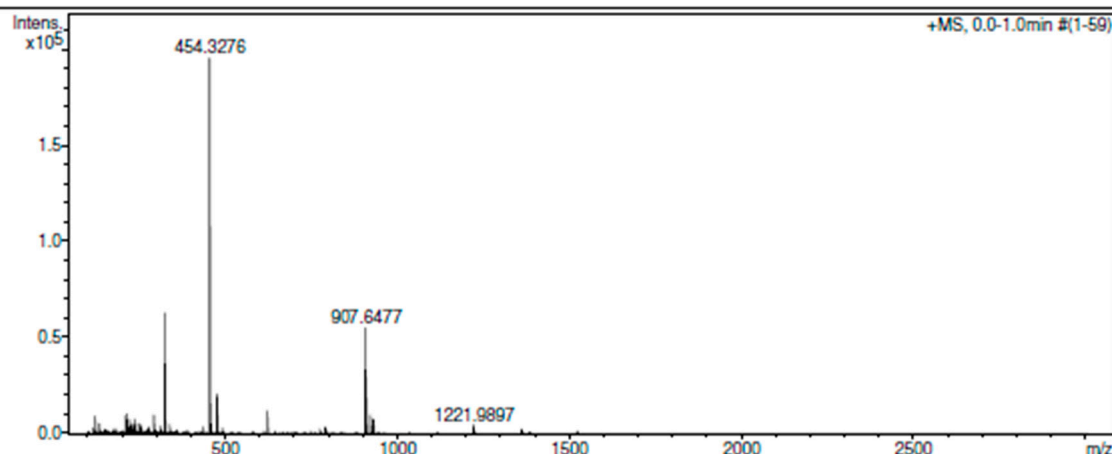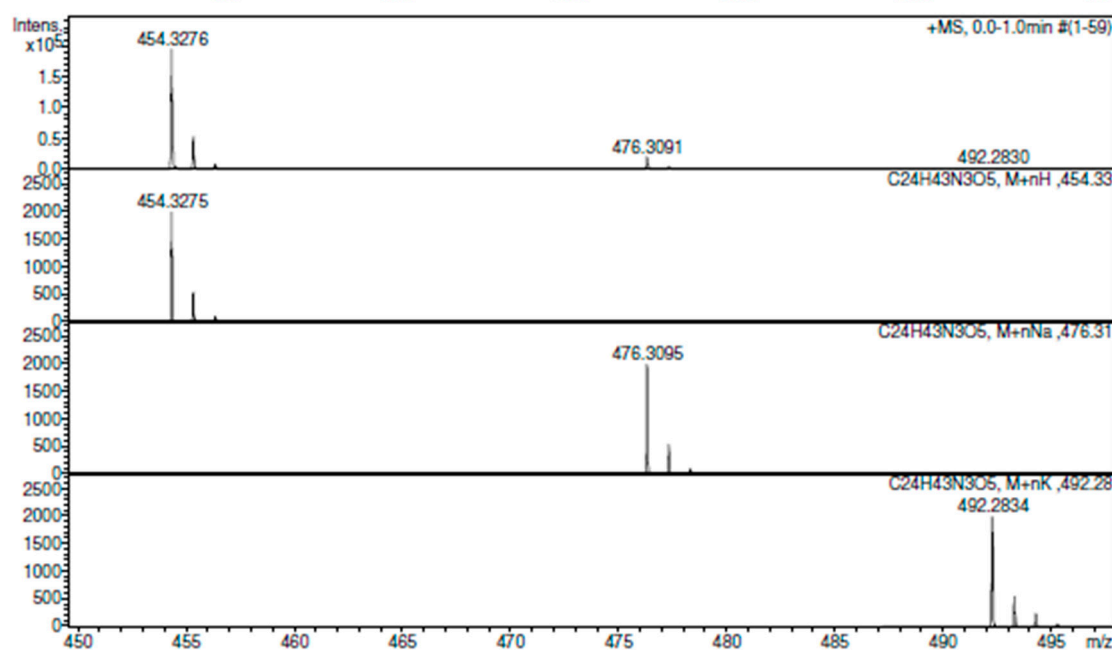

9) *N*<sup>4</sup>-Decyl-6-methylcytosine (12a)

## Display Report

## Analysis Info

Analysis Name D:\Data\Chizhov\IMB\Aleksandrova\Oskol'skii\osk-4\_.clblow.d  
 Method tune\_low.m  
 Sample Name /CHIZ OSK-4  
 Comment CH<sub>3</sub>CN:H<sub>2</sub>O 50/50 %, dil.200, low conc. calibrant added

Acquisition Date 19.01.2024 18:19:07  
 Operator BDAL@DE  
 Instrument / Ser# microTOF 10248

## Acquisition Parameter

|             |            |                      |          |                  |           |
|-------------|------------|----------------------|----------|------------------|-----------|
| Source Type | ESI        | Ion Polarity         | Positive | Set Nebulizer    | 0.4 Bar   |
| Focus       | Not active |                      |          | Set Dry Heater   | 180 °C    |
| Scan Begin  | 50 m/z     | Set Capillary        | 4500 V   | Set Dry Gas      | 4.0 l/min |
| Scan End    | 3000 m/z   | Set End Plate Offset | -500 V   | Set Divert Valve | Waste     |

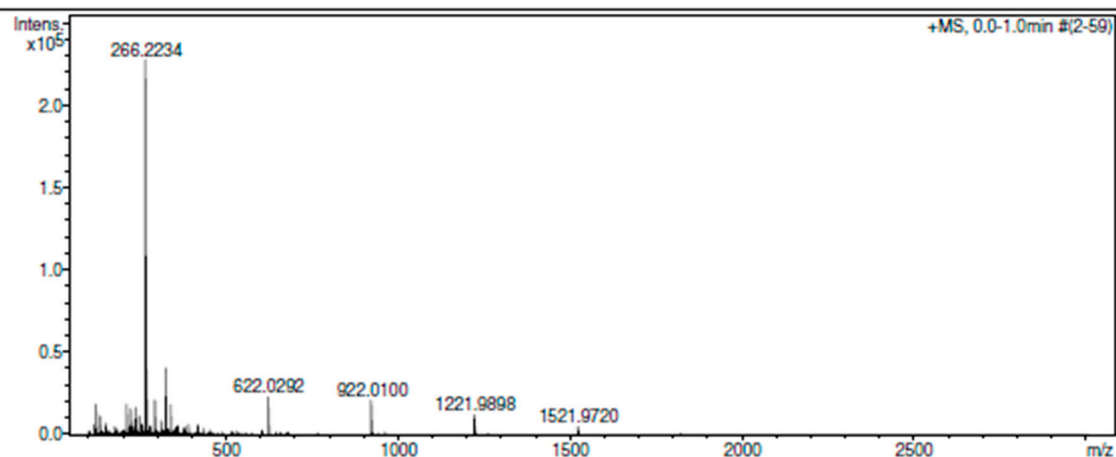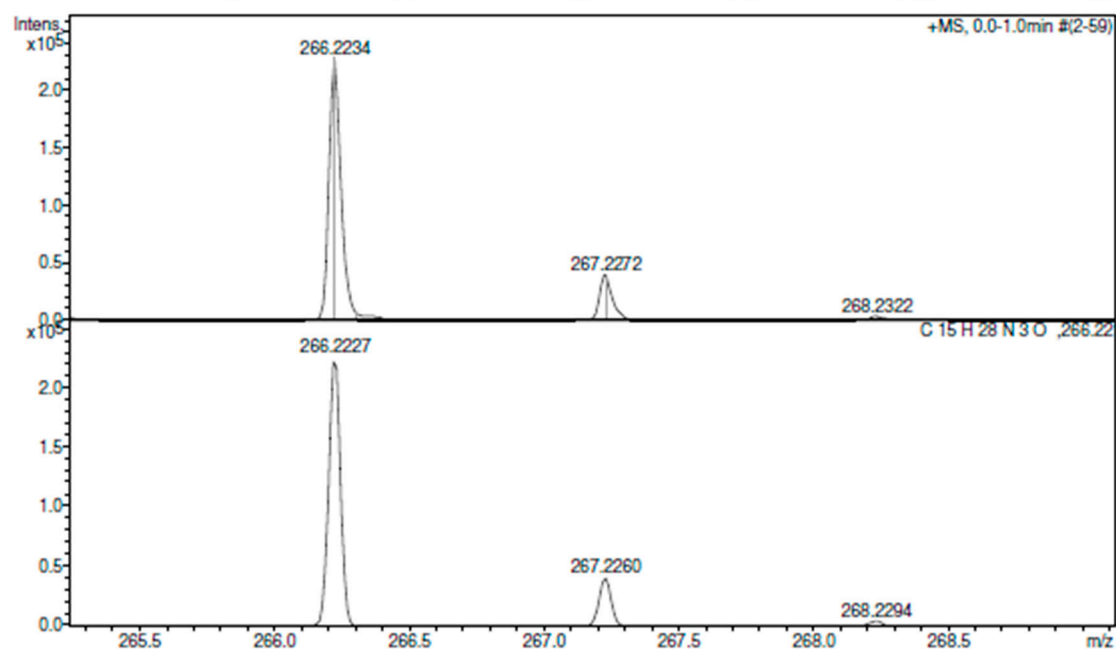

10) N<sup>4</sup>-Dodecyl-6-methylcytosine (12b)

# Display Report

## Analysis Info

Analysis Name D:\Data\Chizhov\IMB\Aleksandrova\Oskol'ski\osk-5\_&clblow.d  
 Method tune\_low.m  
 Sample Name /CHIZ OSK-5  
 Comment CH3CN:H2O 50/50 %, dil.200, low conc. calibrant added

Acquisition Date 19.01.2024 18:23:26

Operator BDAL@DE

Instrument / Ser# micrOTOF 10248

## Acquisition Parameter

|             |            |                      |          |                  |           |
|-------------|------------|----------------------|----------|------------------|-----------|
| Source Type | ESI        | Ion Polarity         | Positive | Set Nebulizer    | 0.4 Bar   |
| Focus       | Not active |                      |          | Set Dry Heater   | 180 °C    |
| Scan Begin  | 50 m/z     | Set Capillary        | 4500 V   | Set Dry Gas      | 4.0 l/min |
| Scan End    | 3000 m/z   | Set End Plate Offset | -500 V   | Set Divert Valve | Waste     |

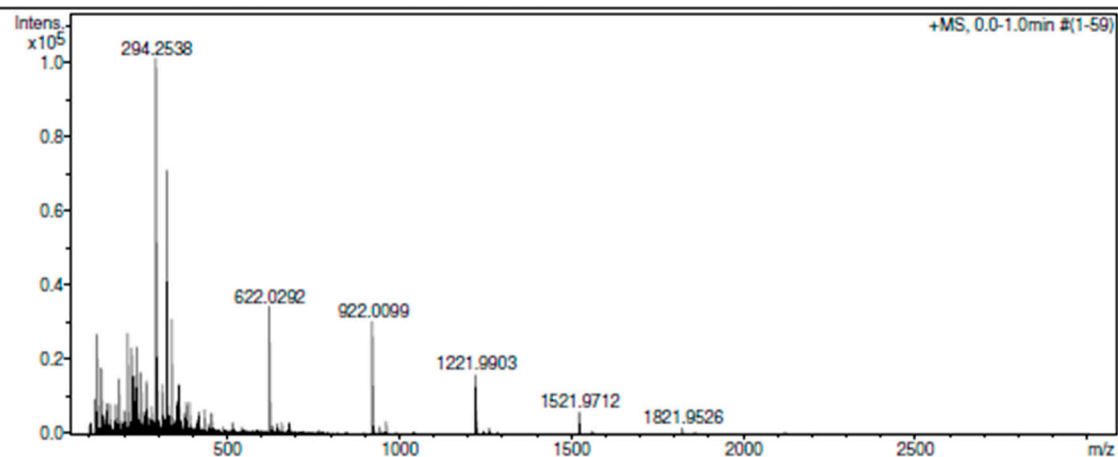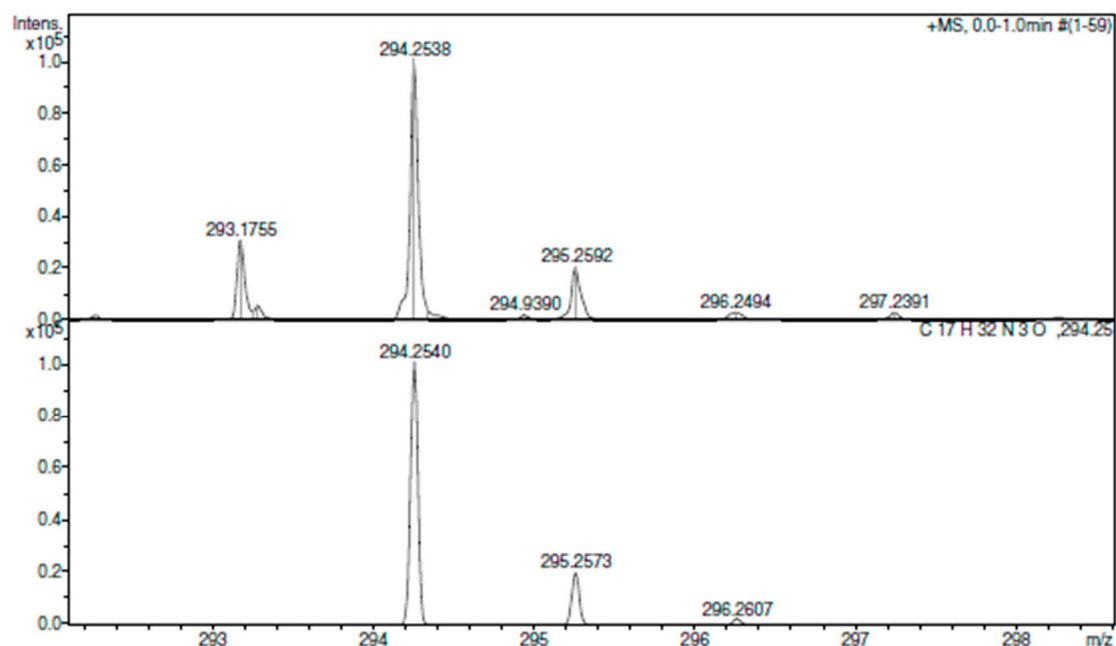

# 11) N<sup>4</sup>-Tetradecyl-6-methylcytosine (12c)

## Display Report

### Analysis Info

Analysis Name D:\Data\Chizhov\IMB\Aleksandrova\Oskol'ski\osk-6\_low.d  
 Method tune\_low.m  
 Sample Name /CHIZ OSK-6  
 Comment CH<sub>3</sub>CN:H<sub>2</sub>O 50/50 %, dil.200, no calibrant added

Acquisition Date 19.01.2024 18:28:37

Operator BDAL@DE

Instrument / Ser# micrOTOF 10248

### Acquisition Parameter

|             |            |                      |          |                  |           |
|-------------|------------|----------------------|----------|------------------|-----------|
| Source Type | ESI        | Ion Polarity         | Positive | Set Nebulizer    | 0.4 Bar   |
| Focus       | Not active |                      |          | Set Dry Heater   | 180 °C    |
| Scan Begin  | 50 m/z     | Set Capillary        | 4500 V   | Set Dry Gas      | 4.0 l/min |
| Scan End    | 3000 m/z   | Set End Plate Offset | -500 V   | Set Divert Valve | Waste     |

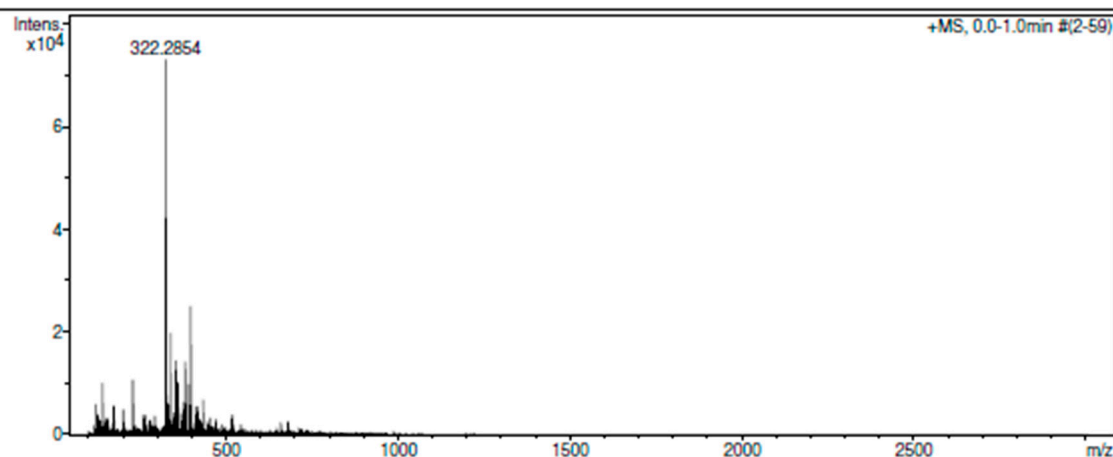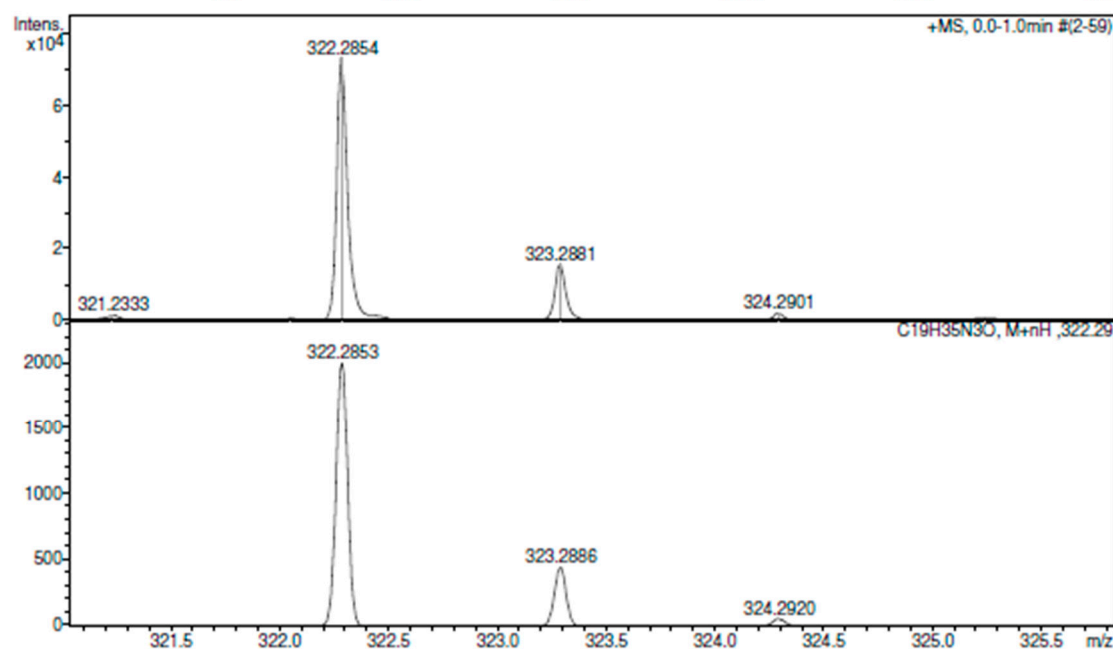

Supplement: s1 [file s1]
